# Supplementary material
Source: MDPI journal article supplement (https://www.mdpi.com/2313-4321/3/1/7)
Supplement: s1 [file s1]

## Supplementary Material:

# Material Implications of Rural Electrification – A methodological framework to assess in-use stocks of off-grid solar products and EEE in rural households in Bangladesh

Alexander Batteiger<sup>1,2, \*</sup> and Vera Susanne Rotter<sup>2</sup>

<sup>1</sup> Microenergy Systems Research Group at Technische Universität Berlin, batteiger@ztg.tu-berlin.de

<sup>2</sup> Chair of Circular Economy and Recycling Technologies at Technische Universität Berlin

\* Correspondence: batteiger@ztg.tu-berlin.de

---

## Content

|    |                                                                                              |    |
|----|----------------------------------------------------------------------------------------------|----|
| 1. | S1: Selection of SHS bundles distributed by Grameen Shakti in Bangladesh in 2016 .....       | 2  |
| 2. | S2: Verbal Description of the attribution of Tier Status (Supply Simple 2015).....           | 2  |
| 3. | S3: Tier Status of households .....                                                          | 3  |
| 4. | S4: Physical Properties of Solar Off-Grid Products: Raw data of the market research.....     | 3  |
| 5. | S5: Linear Regression of the weight of pv-panels and lead-acid batteries over capacity ..... | 17 |
| 6. | S6: Distribution of SHS capacity within the surveyed sample .....                            | 17 |
| 7. | S7: Modelling assumptions and used literature values. ....                                   | 18 |
| 8. | S8: Statistical Distribution of the in-use stocks by different clusters.....                 | 19 |
| 9. | S9: Questionnaire of the Access to electricity survey .....                                  | 19 |

## 1. S1: Selection of SHS bundles distributed by Grameen Shakti in Bangladesh in 2016

Grameen Shakti installed over 1 million Solar Home Systems in Bangladesh. It is the biggest distributor of Solar Home Systems in Bangladesh. As Bangladesh is the biggest market for SHS, it is probable, that Grameen Shakti is the biggest off-grid solar distributor of the world. For more information, please visit [www.gshakti.org](http://www.gshakti.org)

Exchange Rate for Taka into US Dollar retrieved from [xe.com](http://xe.com) 1 USD = 80 Taka (accessed: 10.03.2017)

| System Capacity [W <sub>p</sub> ] | Possible Loads                                                                         | Equipment to be supplied by Grameen Shakti                                                                 | Package Price in cash [Taka / USD]* |
|-----------------------------------|----------------------------------------------------------------------------------------|------------------------------------------------------------------------------------------------------------|-------------------------------------|
| 10                                | 2 x 2.5 Watt LED tube light, mobile phone charging                                     | A 10 Watt panel, 2 x 2.5 Watt LED tube light, a 15 Ah battery, a charge controller, a frame and cables     | 6000 / 75                           |
| 20                                | 3 x 3 Watt LED tube light, mobile phone charging and a 15" LCD/LED TV                  | A 20 Watt panel, 3 x 3 Watt LED light, a 20/30 Ah battery, a charge controller, a frame and cables         | 10000 / 125                         |
| 40/42                             | 3 x 3 Watt LED tube light, mobile phone charging and a 15" LCD/LED TV                  | A 40/42 Watt panel, 3 x 3 Watt LED tube light, a 40/45 Ah battery, a charge controller, a frame and cables | 17000 / 212                         |
| 75                                | 6 x 3 Watt LED tube light, mobile phone charging, a 12 Watt fan and a 15" LCD/LED TV   | A 75 Watt panel, 6 x 3 Watt LED tube light, a 80 Ah battery, a charge controller, a frame and cables       | 26500 / 330                         |
| 130                               | 7 x 3 Watt LED tube light, mobile phone charging two 12 Watt fans and a 15" LCD/LED TV | A 130 Watt panel, 7 x 3 Watt LED tube light, a 130Ah battery, a charge controller, a frame and cables      | 39000 / 485                         |

## 2. S2: Verbal Description of the attribution of Tier Status (Supply Simple 2015)

The following information was retrieved from the supplementary information of Groh et al. (2016) "What are we measuring? An empirical analysis of household electricity access metrics in rural Bangladesh" (<http://www.sciencedirect.com/science/article/pii/S0973082615001027>)

**Tier 0:** A household has no access to electricity or uses dry cell batteries as its main source, or it has less than 1W of capacity or less than 4h of electricity supply per day, or less than 2h per night.

**Tier 1:** A household that does not fall under the category of tier 0 and with a capacity between 1W-50W or a colored TV or fan that causes tripping or is not allowed to be used. A household that has a solar lantern as primary source or an illegal connection. Or a household that has access to a minigrid, a SHS or rechargeable batteries as the main source of electricity in combination with electricity expenditure higher or equal than 10% of the household's total income. Or a household with an unmetered access to a diesel generator where the diesel expenditure is more than 10% of its total income or a metered access to the grid where the monthly tariff is equal or higher than 10% of its total income.

**Tier 2:** A household that does not fall under the category of tier 0 or 1 with a total capacity between 51W and 500W or a printer, air cooler electric food processor, rice cooker, fridge, toaster or electric hari dryer that causes tripping or is not allowed to be used. Or the household has access to SHS or a rechargeable battery system or less than 8h of electricity supply per day or pays his bill for the grid to a private person or doesn't pay at all. Or the household has experienced damages due to voltage drops.

**Tier 3:** A household that does not fall under the category of tier 0, 1 or 2 that has a capacity between 501W and 2000W. Or a washing machine, water pump, water heater, microwave oven, air conditioner, electric space heater or electric cooling system causes tripping or is not allowed to be used. Or the household has access to a minigrid or a diesel generator as the primary energy source or there is less than 16h of electricity supply during the day, or less than 4h in the evening. Or there is no meter and the household is connected to a diesel generator with a cost higher than 5% of the household's total income (obsolete condition). Or there is a (un-)metered electricity access which costs more than 5% of the household's total income. Or there are more than 3 unpredictable interruptions per week staying on longer than 31min.

**Tier 4:** A household that does not fall under the category of tier 0, 1, 2 or 3 that has three or less unpredictable interruptions per week which last less than half an hour and 22h or less of electricity supply per week.

**Tier 5:** A household that does not fall under the category of tier 0, 1, 2, 3 or 4 that has three or less unpredictable interruptions per week which last less than half an hour and more than 22h of electricity supply per week.

### 3. S3: Tier Status of households

**Table 1.** Tier Status of the households in the sample

| Algorithm                      | NA | Tier 0 | Tier 1 | Tier 2 | Tier 3 | Tier 4 |
|--------------------------------|----|--------|--------|--------|--------|--------|
| Electricity Supply Simple 2015 | -  | 57     | 22     | 135    | 17     | -      |
| Appliances                     | 63 | 69     |        | 86     | -      | 13     |

### 4. S4: Physical Properties of Solar Off-Grid Products: Raw data of the market research.

**Table 2.** Physical Properties of PV-Panels for Solar Off-grid Purposes. \* m = monocrystalline, p = polycrystalline

| Capacity in [Wp] | Weight [kg] | Type* | Voltage in [V] | Company               | Source               |
|------------------|-------------|-------|----------------|-----------------------|----------------------|
| 3                | 0,5         | m     | 12             | Sundaya LEC50         | Phaesun C. 2016/2017 |
| 5                | 0,9         | p     | 12             | Phaesun               | Phaesun C. 2014/2015 |
| 5                | 1,3         | m     | 12             | EtSolar               | Phaesun C. 2014/2015 |
| 5                | 0,9         | p     | 12             | Phaesun Sun Plus 5    | Phaesun C. 2016/2017 |
| 5                | 1,5         | m     | 12             | ETSolar ET-M53605     | Phaesun C. 2016/2017 |
| 6                | 1           | m     | 12             | Sundaya LEC100        | Phaesun C. 2016/2017 |
| 9                | 1,5         | m     | 12             | Sundaya LEC150        | Phaesun C. 2016/2017 |
| 10               | 1,2         | p     | 12             | Phaesun               | Phaesun C. 2014/2015 |
| 10               | 1,6         | p     | 12             | Istar Solar           | Phaesun C. 2014/2015 |
| 10               | 1,08        | p     | 12             | Fosera                | Phaesun C. 2014/2015 |
| 10               | 1,2         | p     | 12             | Phaesun Sun Plus 10   | Phaesun C. 2016/2017 |
| 10               | 1,5         | m     | 12             | Phaesun Sun Plus 10 S | Phaesun C. 2016/2017 |
| 10               | 1,8         | m     | 12             | ETSolar ET-M53610     | Phaesun C. 2016/2017 |
| 12               | 2           | m     | 12             | Sundaya LEC200        | Phaesun C. 2016/2017 |
| 20               | 2,1         | p     | 12             | Phaesun               | Phaesun C. 2014/2015 |
| 20               | 2,4         |       | 12             | EtSolar               | Phaesun C. 2014/2015 |
| 20               | 3           | p     | 12             | Istar Solar           | Phaesun C. 2014/2015 |
| 20               | 1,78        | p     | 12             | Fosera                | Phaesun C. 2014/2015 |
| 20               | 2,1         | p     | 12             | Phaesun Sun Plus 20   | Phaesun C. 2016/2017 |
| 20               | 2,1         | m     | 12             | Phaesun Sun Plus 20 S | Phaesun C. 2016/2017 |

| Capacity<br>in [Wp] | Weight<br>[kg] | Type* | Voltage<br>in [V] | Company                     | Source               |
|---------------------|----------------|-------|-------------------|-----------------------------|----------------------|
| 20                  | 2,4            | m     | 12                | ETSolar ET-M53620 ED        | Phaesun C. 2016/2017 |
| 30                  | 2,95           | m     | 12                | Phaesun                     | Phaesun C. 2014/2015 |
| 30                  | 4              |       | 12                | EtSolar                     | Phaesun C. 2014/2015 |
| 30                  | 4              | p     | 12                | Istar Solar                 | Phaesun C. 2014/2015 |
| 30                  | 4              | m     | 12                | Phaesun Sun Plus 30         | Phaesun C. 2016/2017 |
| 30                  | 2,95           | m     | 12                | Phaesun Sun Peak SPR 30     | Phaesun C. 2016/2017 |
| 30                  | 4              | m     | 12                | ETSolar ET-M53630           | Phaesun C. 2016/2017 |
| 45                  | 5              | p     | 12                | Istar Solar                 | Phaesun C. 2014/2015 |
| 50                  | 5,5            | m     | 12                | Phaesun                     | Phaesun C. 2014/2015 |
| 50                  | 5              |       | 12                | EtSolar                     | Phaesun C. 2014/2015 |
| 50                  | 5,5            | m     | 12                | Phaesun Sun Plus 50 S       | Phaesun C. 2016/2017 |
| 50                  | 5              | m     | 12                | ETSolar ET-M53650           | Phaesun C. 2016/2017 |
| 60                  | 5,7            | m     | 12                | Phaesun                     | Phaesun C. 2014/2015 |
| 60                  | 5,7            | m     | 12                | Phaesun Sun Peak SPR 60     | Phaesun C. 2016/2017 |
| 70                  | 6              | p     | 12                | Istar Solar                 | Phaesun C. 2014/2015 |
| 75                  | 8              | p     | 12                | Istar Solar                 | Phaesun C. 2014/2015 |
| 80                  | 6,2            | m     | 12                | Solarworld                  | Phaesun C. 2014/2015 |
| 80                  | 6,2            | m     | 12                | Phaesun Sun Plus 80         | Phaesun C. 2016/2017 |
| 80                  | 6,2            | m     | 12                | Solarworld SW 80 mono RHA   | Phaesun C. 2016/2017 |
| 85                  | 7              | m     | 12                | Phaesun                     | Phaesun C. 2014/2015 |
| 85                  | 7,5            | m     | 12                | Phaesun                     | Phaesun C. 2014/2015 |
| 85                  | 7              | m     | 12                | Phaesun Sun Peak SPR 85     | Phaesun C. 2016/2017 |
| 85                  | 7,5            | m     | 12                | Phaesun Sun Peak SPR 85 S   | Phaesun C. 2016/2017 |
| 90                  | 8,2            |       | 12                | EtSolar                     | Phaesun C. 2014/2015 |
| 90                  | 7              | m     | 12                | Phaesun Sun Peak SPR 90     | Phaesun C. 2016/2017 |
| 90                  | 7,5            | m     | 12                | Phaesun Sun Peak SPR 90 S   | Phaesun C. 2016/2017 |
| 90                  | 8,2            | m     | 12                | ETSolar ET-M53690           | Phaesun C. 2016/2017 |
| 100                 | 7,8            | m     | 12                | Phaesun                     | Phaesun C. 2014/2015 |
| 100                 | 7,4            | m     | 12                | Phaesun                     | Phaesun C. 2014/2015 |
| 100                 | 8,2            |       | 12                | EtSolar                     | Phaesun C. 2014/2015 |
| 100                 | 8              | m     | 24                | Solarworld                  | Phaesun C. 2014/2015 |
| 100                 | 7,8            | m     | 12                | Phaesun Sun Plus 100        | Phaesun C. 2016/2017 |
| 100                 | 7,4            | m     | 12                | Phaesun Sun Peak SPR 100    | Phaesun C. 2016/2017 |
| 100                 | 8,2            | m     | 12                | ETSolar ET-M536100          | Phaesun C. 2016/2017 |
| 100                 | 8              | p     | 24                | Solarworld SW 80 poly RGP   | Phaesun C. 2016/2017 |
| 110                 | 9,3            | p     | 12                | Istar Solar                 | Phaesun C. 2014/2015 |
| 130                 | 12,25          | m     | 12                | Phaesun                     | Phaesun C. 2014/2015 |
| 130                 | 12,25          | m     | 24                | Phaesun                     | Phaesun C. 2014/2015 |
| 130                 | 12,25          | m     | 12                | Phaesun Sun Peak SPR 130    | Phaesun C. 2016/2017 |
| 130                 | 12,25          | m     | 24                | Phaesun Sun Peak SPR 130    | Phaesun C. 2016/2017 |
| 135                 | 13,2           | p     | 12                | EtSolar                     | Phaesun C. 2014/2015 |
| 135                 | 13,2           | p     | 12                | ETSolar ET-M536135          | Phaesun C. 2016/2017 |
| 140                 | 12,25          | m     | 12                | Phaesun Sun Peak SPR 140_12 | Phaesun C. 2016/2017 |
| 140                 | 12,25          | m     | 24                | Phaesun Sun Peak SPR 140_24 | Phaesun C. 2016/2017 |
| 150                 | 11,8           | m     | 12                | Solarworld                  | Phaesun C. 2014/2015 |
| 150                 | 13             | p     | 12                | Istar Solar                 | Phaesun C. 2014/2015 |

| Capacity<br>in [Wp] | Weight<br>[kg] | Type* | Voltage<br>in [V] | Company                    | Source               |
|---------------------|----------------|-------|-------------------|----------------------------|----------------------|
| 150                 | 11             | p     | 12                | Phaesun Sun Plus 150_12    | Phaesun C. 2016/2017 |
| 150                 | 16,5           | p     | 24                | Phaesun Sun Plus 150_24    | Phaesun C. 2016/2017 |
| 150                 | 11,8           | p     | 12                | Solarworld SW 150 poly R6A | Phaesun C. 2016/2017 |

**Table 3** Physical Properties of Lead-Acid Batteries for Solar Off-grid Purposes

| Capacity<br>[Ah] | Weight<br>[kg] | Type            | Producer                                       | Source               |
|------------------|----------------|-----------------|------------------------------------------------|----------------------|
| 1,2              | 0,6            | AGM             | Intact Block-Power BP 12-1.2                   | Phaesun C. 2016/2017 |
| 2,1              | 0,9            | AGM             | Intact Block-Power BP 12-2.1                   | Phaesun C. 2016/2017 |
| 2,9              | 1,1            | AGM             | Intact Block-Power BP 12-2.9                   | Phaesun C. 2016/2017 |
| 3,5              | 1,3            | AGM             | Intact Block-Power BP 12-3.5                   | Phaesun C. 2016/2017 |
| 4                | 1,5            | AGM             | Intact Block-Power BP 12-4                     | Phaesun C. 2016/2017 |
| 6,6              | 2,6            | AGM             | Sonnenschein Solar S12/6,6S                    | Phaesun C. 2016/2017 |
| 7                | 2,5            | AGM             | Intact Block-Power BP 12-7                     | Phaesun C. 2016/2017 |
| 10               | 3,4            | AGM             | Intact Block-Power BP 12-10                    | Phaesun C. 2016/2017 |
| 12               | 3,8            | AGM             | Intact Block-Power BP 12-12                    | Phaesun C. 2016/2017 |
| 17               | 6,1            | AGM             | Sonnenschein Solar S12/17.0 G5                 | Phaesun C. 2016/2017 |
| 17               | 5,6            | AGM             | Intact Block-Power BP 12-17                    | Phaesun C. 2016/2017 |
| 18               | 6              | Gel             | Intact                                         | Phaesun C. 2014/2015 |
| 18               | 6              | Gel             | Intact Gel-Power 16                            | Phaesun C. 2016/2017 |
| 20               | 10,75          | Tubular Plate   | Hamko                                          | Data Sheet           |
| 20               | 14,2           | Tubular Plate   | Gaston                                         | Data Sheet           |
| 24               | 5,8            | AGM             | Intact Block-Power BP 12-24N                   | Phaesun C. 2016/2017 |
| 26               | 8,4            | AGM             | Intact Block-Power BP 12-26                    | Phaesun C. 2016/2017 |
| 26               | 8              | AGM             | Intact Block-Power BP 12-26N                   | Phaesun C. 2016/2017 |
| 27               | 9,5            | Gel             | intact                                         | Phaesun C. 2014/2015 |
| 27               | 9,6            | AGM             | Sonnenschein Solar S12/27 G5                   | Phaesun C. 2016/2017 |
| 27               | 9,5            | Gel             | Intact Gel-Power 25                            | Phaesun C. 2016/2017 |
| 30               | 17,1           | Tubular Plate   | Hamko                                          | Data Sheet           |
| 30               | 16             | Tubular Plate   | Gaston                                         | Data Sheet           |
| 32               | 11,1           | Gel             | Intact                                         | Phaesun C. 2014/2015 |
| 32               | 11,1           | AGM             | Sonnenschein S12/32 G6                         | Phaesun C. 2016/2017 |
| 32               | 11,1           | Gel             | Intact Gel-Power 30                            | Phaesun C. 2016/2017 |
| 35               | 11,2           | AGM             | Intact Block-Power BP 12-35                    | Phaesun C. 2016/2017 |
| 38               | 13,5           | AGM             | Intact Block-Power BP 12-38                    | Phaesun C. 2016/2017 |
| 40               | 20,73          | Tubular Plate   | Hamko                                          | Data Sheet           |
| 40               | 17,4           | Tubular Plate   | Gaston                                         | Data Sheet           |
| 41               | 14,6           | Gel             | intact                                         | Phaesun C. 2014/2015 |
| 41               | 14,2           | AGM             | Sonnenschein Solar S12/41 A                    | Phaesun C. 2016/2017 |
| 41               | 14,6           | Gel             | Intact Gel-Power 40 B                          | Phaesun C. 2016/2017 |
| 52               | 14,8           | AGM             | Intact Block-Power BP 12-50                    | Phaesun C. 2016/2017 |
| 55               | 26,9           | Tubular Plate   | Hamko                                          | Data Sheet           |
| 55               | 18             | Gel             | Intact                                         | Phaesun C. 2014/2015 |
| 55               | 18             | Gel             | Intact Gel-Power 50 B                          | Phaesun C. 2016/2017 |
| 55               | 13,3           | Flooded Battery | Intact Solar-Power Batteries<br>Solar-Power 55 | Phaesun C. 2016/2017 |

| Capacity [Ah] | Weight [kg] | Type                       | Producer                                            | Source               |
|---------------|-------------|----------------------------|-----------------------------------------------------|----------------------|
| 60            | 29,2        | Tubular Plate              | Gaston                                              | Data Sheet           |
| 60            | 19          | Gel                        | intact                                              | Phaesun C. 2014/2015 |
| 60            | 18,1        | AGM                        | Sonnenschein Solar S12/60 A                         | Phaesun C. 2016/2017 |
| 60            | 19          | AGM                        | sun.power VR-M 12 V 58                              | Phaesun C. 2016/2017 |
| 60            | 19          | Gel                        | Intact Gel-Power 55                                 | Phaesun C. 2016/2017 |
| 65            | 21,8        | Gel                        | Intact                                              | Phaesun C. 2014/2015 |
| 65            | 22          | AGM                        | Intact Block-Power BP 12-65                         | Phaesun C. 2016/2017 |
| 65            | 21,8        | Gel                        | Intact Gel-Power 60                                 | Phaesun C. 2016/2017 |
| 65            | 21,8        | Gel                        | Intact Gel-Power 60 B                               | Phaesun C. 2016/2017 |
| 70            | 23          | AGM                        | sun.power VR-M 12 V 70                              | Phaesun C. 2016/2017 |
| 70            | 14          | Flooded Battery            | Intact Solar-Power Batteries<br>Solar-Power 70      | Phaesun C. 2016/2017 |
| 70            | 37          | Flooded Battery            | Hoppecke 12V 1 OPzS bloc<br>solar.power 70          | Phaesun C. 2016/2017 |
| 72            | 22          | AGM                        | Phaesun Sun Store 65                                | Phaesun C. 2016/2017 |
| 72            | 20          | AGM                        | Phaesun Store Rich 70                               | Phaesun C. 2016/2017 |
| 75            | 15,5        | Flooded Battery            | Intact Solar-Power Batteries<br>Solar-Power 75      | Phaesun C. 2016/2017 |
| 78            | 23,8        | AGM                        | Intact Block-Power BP 12-75                         | Phaesun C. 2016/2017 |
| 80            | 36,53       | Tubular Plate              | Hamko                                               | Data Sheet           |
| 80            | 33,35       | Tubular Plate              | Gaston                                              | Data Sheet           |
| 80            | 23          | Gel                        | intact                                              | Phaesun C. 2014/2015 |
| 80            | 24          | AGM                        | sun.power VR-M 12 V 80                              | Phaesun C. 2016/2017 |
| 80            | 23          | Gel                        | Intact Gel-Power 75                                 | Phaesun C. 2016/2017 |
| 81            | 35          | Flooded Battery            | GNB Industrial Power Classic OPzS<br>Solar Block 70 | Phaesun C. 2016/2017 |
| 85            | 26          | Gel                        | Intact                                              | Phaesun C. 2014/2015 |
| 85            | 26,8        | AGM                        | Sonnenschein Solar S12/85 A                         | Phaesun C. 2016/2017 |
| 85            | 26          | Gel                        | Intact Gel-Power 80 B                               | Phaesun C. 2016/2017 |
| 90            | 32          | Gel                        | intact                                              | Phaesun C. 2014/2015 |
| 90            | 29,2        | AGM                        | Sonnenschein Solar S12/90 A                         | Phaesun C. 2016/2017 |
| 90            | 24,5        | AGM                        | Intact Block-Power BP 12-90                         | Phaesun C. 2016/2017 |
| 90            | 28          | AGM                        | sun.power VR-M 12 V 90                              | Phaesun C. 2016/2017 |
| 90            | 32          | Gel                        | Intact Gel-Power 85                                 | Phaesun C. 2016/2017 |
| 90            | 17,4        | Flooded Battery            | Intact Solar-Power Batteries<br>Solar-Power 90      | Phaesun C. 2016/2017 |
| 92            | 23,5        | AGM                        | Phaesun Sun Store 80                                | Phaesun C. 2016/2017 |
| 92            | 34          | AGM                        | Phaesun Store Rich 70                               | Phaesun C. 2016/2017 |
| 100           | 42,6        | Tubular Plate<br>Lead-Acid | Hamko                                               | Data Sheet           |
| 100           | 36,9        | Tubular Plate<br>Lead-Acid | Gaston                                              | Data Sheet           |
| 100           | 38          | AGM                        | sun.power VR-M 12 V 105                             | Phaesun C. 2016/2017 |
| 107           | 31          | AGM                        | Intact Block-Power BP 12-100                        | Phaesun C. 2016/2017 |
| 110           | 18,2        | Flooded Battery            | Intact Solar-Power Batteries<br>Solar-Power 110     | Phaesun C. 2016/2017 |
| 115           | 30          | AGM                        | Phaesun Sun Store 100                               | Phaesun C. 2016/2017 |
| 115           | 28          | Flooded Battery            | Intact Solar-Power Batteries<br>Solar-Power 115     | Phaesun C. 2016/2017 |
| 120           | 26          | Flooded Battery            | Intact Solar-Power Batteries                        | Phaesun C. 2016/2017 |

| Capacity<br>[Ah] | Weight<br>[kg] | Type                       | Producer                                             | Source               |
|------------------|----------------|----------------------------|------------------------------------------------------|----------------------|
|                  |                |                            | Solar-Power 120                                      |                      |
| 124              | 38             | AGM                        | Intact Block-Power BP 12-120                         | Phaesun C. 2016/2017 |
| 125              | 28,7           | Flooded Battery            | Intact Solar-Power Batteries<br>Solar-Power 125      | Phaesun C. 2016/2017 |
| 128              | 23,7           | Flooded Battery            | Intact Solar-Power Batteries<br>Solar-Power 128      | Phaesun C. 2016/2017 |
| 130              | 54,5           | Tubular Plate<br>Lead-Acid | Hamko                                                | Information Sheet    |
| 130              | 53             | Tubular Plate<br>Lead-Acid | Gaston                                               | Information Sheet    |
| 130              | 40             | Gel                        | Intact                                               | Phaesun C. 2014/2015 |
| 130              | 37,5           | AGM                        | Sonnenschein Solar S12/130 A                         | Phaesun C. 2016/2017 |
| 130              | 46             | AGM                        | sun.power VR-M 12 V 135                              | Phaesun C. 2016/2017 |
| 130              | 40             | Gel                        | Intact Gel-Power 115                                 | Phaesun C. 2016/2017 |
| 130              | 32,3           | Flooded Battery            | Intact Solar-Power Batteries<br>Solar-Power 130      | Phaesun C. 2016/2017 |
| 130              | 48             | Flooded Battery            | Hoppecke 12V 1 OPzS bloc<br>solar.power 130          | Phaesun C. 2016/2017 |
| 135              | 41             | Gel                        | intact                                               | Phaesun C. 2014/2015 |
| 135              | 41             | Gel                        | Intact Gel-Power 120                                 | Phaesun C. 2016/2017 |
| 136              | 45             | Flooded Battery            | GNB Industrial Power Classic OPzS<br>Solar Block 140 | Phaesun C. 2016/2017 |
| 138              | 37,6           | AGM                        | Phaesun Sun Store 120                                | Phaesun C. 2016/2017 |
| 140              | 40             | Gel                        | Intact Gel-Power 125                                 | Phaesun C. 2016/2017 |
| 140              | 37,2           | Flooded Battery            | Intact Solar-Power Batteries<br>Solar-Power 140      | Phaesun C. 2016/2017 |
| 149              | 45             | AGM                        | Intact Block-Power BP 12-140                         | Phaesun C. 2016/2017 |
| 150              | 55             | AGM                        | sun.power VR-M 12 V 150                              | Phaesun C. 2016/2017 |
| 155              | 48             | Gel                        | Intact Gel-Power 140                                 | Phaesun C. 2016/2017 |
| 156              | 48             | AGM                        | Intact Block-Power BP 12-150                         | Phaesun C. 2016/2017 |
| 172              | 48,2           | AGM                        | Phaesun Sun Store 150                                | Phaesun C. 2016/2017 |
| 190              | 32             | AGM                        | sun.power VR-M 6 V 200                               | Phaesun C. 2016/2017 |
| 200              | 33             | Gel                        | Intact Gel-Power 180-06 V1                           | Phaesun C. 2016/2017 |
| 200              | 33             | Gel                        | Intact Gel-Power 180-06 V2                           | Phaesun C. 2016/2017 |
| 200              | 48             | Flooded Battery            | Intact Solar-Power Batteries<br>Solar-Power 200      | Phaesun C. 2016/2017 |
| 200              | 67             | Flooded Battery            | Hoppecke 12V 1 OPzS bloc<br>solar.power 200          | Phaesun C. 2016/2017 |
| 203              | 65             | Flooded Battery            | GNB Industrial Power Classic OPzS<br>Solar Block 210 | Phaesun C. 2016/2017 |
| 208              | 66             | AGM                        | Intact Block-Power BP 12-200                         | Phaesun C. 2016/2017 |
| 230              | 64             | AGM                        | Phaesun Sun Store 200                                | Phaesun C. 2016/2017 |
| 230              | 70             | Gel                        | Intact Gel-Power 210                                 | Phaesun C. 2016/2017 |
| 250              | 41             | AGM                        | sun.power VR-M 6 V 250                               | Phaesun C. 2016/2017 |
| 250              | 61             | Flooded Battery            | Intact Solar-Power Batteries<br>Solar-Power 250      | Phaesun C. 2016/2017 |
| 262              | 73             | AGM                        | Intact Block-Power BP 12-250                         | Phaesun C. 2016/2017 |
| 330              | 48             | Gel                        | Intact Gel-Power 300-06                              | Phaesun C. 2016/2017 |

**Table 4** Physical Properties of other battery technologies for off-grid solar proposes

| Capacity | Type    | Weight [kg] | Producer                         | Source                                                                                                                                                                        |
|----------|---------|-------------|----------------------------------|-------------------------------------------------------------------------------------------------------------------------------------------------------------------------------|
| 4 Ah     | LiFEPO4 | 0.68        | Phaesun Solar Side 4             | Phaesun C. 2016/2017                                                                                                                                                          |
| 7 Ah     | LiFEPO4 | 1.03        | Phaesun Solar Side 7             | Phaesun C. 2016/2017                                                                                                                                                          |
| 4,5 Ah   | LiFEPO4 | 0.8         | Vision Power Green<br>LFP124.5 T | Phaesun C. 2016/2017                                                                                                                                                          |
| 10 Ah    | LiFEPO4 | 1.4         | Vision Power Green<br>LFP1210    | Phaesun C. 2016/2017                                                                                                                                                          |
| 15 Ah    | LiFEPO4 | 1.8         | Vision Power Green<br>LFP1215    | Phaesun C. 2016/2017                                                                                                                                                          |
| 17 Ah    | LiFEPO4 | 2.7         | Vision Power Green<br>LFP1217    | Phaesun C. 2016/2017                                                                                                                                                          |
| 25 Ah    | LiFEPO4 | 4.0         | Vision Power Green<br>LFP1225    | Phaesun C. 2016/2017                                                                                                                                                          |
| 40 Ah    | LiFEPO4 | 6.0         | Vision Power Green<br>LFP1240    | Phaesun C. 2016/2017                                                                                                                                                          |
| 580 kJ   | Li-Ion  | 1.25        | Sundaya Joule Box 500            | <a href="http://www.sundaya.se/files/JouleBox500_datash_eets_Feb_2015.pdf">http://www.sundaya.se/files/JouleBox500_datash_eets_Feb_2015.pdf</a><br>[Accessed 06.12.2016]      |
| 1000 kJ  | Li-Ion  | 2.1         | Sundaya Joule Box 1000           | <a href="http://sundaya.com/files/Sundaya_JouleBox_data_sheets_July2016.pdf">http://sundaya.com/files/Sundaya_JouleBox_data_sheets_July2016.pdf</a><br>[accessed: 06.12.2016] |
| 4Ah      | LiFEPO4 | 0.680       | Zimpertec LS 4000                | <a href="http://www.zimpertec.com/Lithium-Battery-Systems">http://www.zimpertec.com/Lithium-Battery-Systems</a>                                                               |
| 7Ah      | LiFEPO4 | 1030        | Zimpertec LS 7000                | <a href="http://www.zimpertec.com/Lithium-Battery-Systems">http://www.zimpertec.com/Lithium-Battery-Systems</a>                                                               |

**Table 5.** Physical Properties of Lighting Equipment for solar off-grid purposes

| Wattage [W] | Weight [g] | Type     | Lumen | Additional Inform. | Company                        | Source Company       |
|-------------|------------|----------|-------|--------------------|--------------------------------|----------------------|
| 1,3         | 48         | bulb     |       | Only LED           | Phaesun                        | Phaesun C. 2016/2017 |
| 3           | 60         | bulb     |       | Only LED           | Phaesun                        | Phaesun C. 2016/2017 |
| 4,5         | 80         | bulb     |       | Only LED           | Phaesun                        | Phaesun C. 2016/2017 |
| 4,4         | 10         | LED bulb | 500   | Only LED           | Steca LED Lamp<br>Steca LED 4  | Phaesun C. 2016/2017 |
| 5,6         | 12         | LED bulb | 600   | Only LED           | Steca LED Lamp<br>Steca LED 6  | Phaesun C. 2016/2017 |
| 7,8         | 15         | LED bulb | 800   | Only LED           | Steca LED Lamp<br>Steca LED 8  | Phaesun C. 2016/2017 |
| 11,5        | 29         | LED bulb | 1100  | Only LED           | Steca LED Lamp<br>Steca LED 12 | Phaesun C. 2016/2017 |
| 1,6         | 60         | LED bulb | 176   | Only LED           | Phaesun Lux Me<br>WW 150_12    | Phaesun C. 2016/2017 |
| 3           | 60         | LED bulb | 300   | Only LED           | Phaesun Lux Me<br>NW 270_12    | Phaesun C. 2016/2017 |
| 8           | 140        | LED bulb | 760   | Only LED           | Phaesun Lux Me<br>WW 720_12    | Phaesun C. 2016/2017 |
| 4,5         | 80         | LED bulb | 420   | Only LED           | Phaesun PN-OP                  | Phaesun C. 2016/2017 |



| Wattage [W] | Weight [g] | Type              | Lumen     | Additional Inform.     | Company                   | Source Company                                                                                                                                    |
|-------------|------------|-------------------|-----------|------------------------|---------------------------|---------------------------------------------------------------------------------------------------------------------------------------------------|
|             |            |                   |           |                        | 401T E27 12V W            |                                                                                                                                                   |
| 3           | 120        | tube light        | 300       | Only LED tube light    | Phaesun Super Illu 270_12 | Phaesun C. 2016/2017                                                                                                                              |
| 5           | 120        | tube light        | 500       | Only LED tub light     | Phaesun Super Illu 450_12 | Phaesun C. 2016/2017                                                                                                                              |
| 10          | 140        | tube light        | 1000      | Only LED tube light    | Phaesun Super Illu 900_12 | Phaesun C. 2016/2017                                                                                                                              |
| 5           | 120        | tube light        | 500       | Only LED tube light    | Phaesun Super Illu 450_24 | Phaesun C. 2016/2017                                                                                                                              |
| 10          | 140        | tube light        | 1000      | Only LED tube light    | Phaesun Super Illu 900_24 | Phaesun C. 2016/2017                                                                                                                              |
| 0,8         | 16,5       | LED bulb          | 100       | only Led               | Sundaya Ulite 100         | <a href="http://sundaya.com/files/Sundaya_JouleBox_datasheets_July2016.pdf">http://sundaya.com/files/Sundaya_JouleBox_datasheets_July2016.pdf</a> |
| 1,9         | 30         | LED bulb          | 200       | only LED               | Sundaya Ulite 200         | <a href="http://sundaya.com/files/Sundaya_JouleBox_datasheets_July2016.pdf">http://sundaya.com/files/Sundaya_JouleBox_datasheets_July2016.pdf</a> |
| 3,6         | 41         | LED bulb          | 400       | only LED               | Sundaya Ulite 400         | <a href="http://sundaya.com/files/Sundaya_JouleBox_datasheets_July2016.pdf">http://sundaya.com/files/Sundaya_JouleBox_datasheets_July2016.pdf</a> |
| 5,8         | 41         | LED bulb          | 600       | only LED               | Sundaya Ulite 400         | <a href="http://sundaya.com/files/Sundaya_JouleBox_datasheets_July2016.pdf">http://sundaya.com/files/Sundaya_JouleBox_datasheets_July2016.pdf</a> |
| 0,78        | 330        | bulb              |           | Incl. Cable and switch | Fosera                    | Datasheet                                                                                                                                         |
| 1,56        | 330        | bulb              |           | Incl. Cable and switch | Fosera                    | Datasheet                                                                                                                                         |
| 1,1         | 690        | bulb              | 20/50/100 | Incl. 4m Cable         | Niwa LED Lamp Home 100    | Phaesun C. 2016/2017                                                                                                                              |
| 3,3         | 690        | bulb              |           | including Cable        | Niwa                      | Datasheet                                                                                                                                         |
| 2           | 117        | Lamp Sun Flower   | 200       | Lamp and lampshade     | Phaesun Sun Flower 180_12 | Phaesun C. 2016/2017                                                                                                                              |
| 3           | 117        | Lamp Sun Flower   | 300       | Lamp and lampshade     | Phaesun Sun Flower 270_12 | Phaesun C. 2016/2017                                                                                                                              |
| 5           | 117        | Lamp Sun Flower   | 500       | Lamp and lampshade     | Phaesun Sun Flower 450_12 | Phaesun C. 2016/2017                                                                                                                              |
| 7           | 117        | Lamp Sun Flower   | 700       | Lamp and lampshade     | Phaesun Sun Flower 630_12 | Phaesun C. 2016/2017                                                                                                                              |
| 2,5         | 320        | LED lighting Unit | 165       | Lighting unit          | Microlux SI3 2-1          | Phaesun C. 2016/2017                                                                                                                              |
| 5           | 568        | LED lighting Unit | 165       | Lighting unit          | Microlux SI3 2-3          | Phaesun C. 2016/2017                                                                                                                              |
| 7           | 460        | LED lighting Unit | 900       | Lighting unit          | Powerlux SI3 5-1MV        | Phaesun C. 2016/2017                                                                                                                              |
| 12,5        | 460        | LED lighting Unit | 1420      | Lighting unit          | Powerlux SI3 5-3MV        | Phaesun C. 2016/2017                                                                                                                              |

Table 6 Charge Controller for solar off-grid proposes

| Current | Voltage [V] | Weight [g] | Company           | Source               |
|---------|-------------|------------|-------------------|----------------------|
| 3A      | 12/24       | 160        | Steca             | Phaesun C. 2014/2015 |
| 5A      |             | 160        | Steca             | Phaesun C. 2014/2015 |
| 6A      | 12/24       | 150        | Steca Solsum 6.6F | Phaesun C. 2016/2017 |
| 8A      | 12/24       | 150        | Steca Solsum 8.8F | Phaesun C. 2016/2017 |

| Current | Voltage [V] | Weight [g] | Company                                             | Source                                                                                                                      |
|---------|-------------|------------|-----------------------------------------------------|-----------------------------------------------------------------------------------------------------------------------------|
| 10A     | 12/24       | 150        | Steca Solsum 10.10F                                 | Phaesun C. 2016/2017                                                                                                        |
| 25A     | 12/24       | 345        | Steca Solsum 2525                                   | Phaesun C. 2016/2017                                                                                                        |
| 40A     | 12/24       | 345        | Steca Solsum 4040                                   | Phaesun C. 2016/2017                                                                                                        |
| 10A     | 12/24       | 345        | Steca Solarix PRS 1010                              | Phaesun C. 2016/2017                                                                                                        |
| 15A     | 12/24       | 345        | Steca Solarix PRS 1515                              | Phaesun C. 2016/2017                                                                                                        |
| 20A     | 12/24       | 345        | Steca Solarix PRS 2020                              | Phaesun C. 2016/2017                                                                                                        |
| 30A     | 12/24       | 345        | Steca Solarix PRS 3030                              | Phaesun C. 2016/2017                                                                                                        |
| 15A     | 12/24       | 340        | Morningstar PS-15M                                  | Phaesun C. 2016/2017                                                                                                        |
| 15A     | 48          | 340        | Morningstar PS-15M-48V                              | Phaesun C. 2016/2017                                                                                                        |
| 15A     | 48          | 340        | Morningstar PS-15M-48V-PG                           | Phaesun C. 2016/2017                                                                                                        |
| 30A     | 12/24       | 340        | Morningstar PS-30M                                  | Phaesun C. 2016/2017                                                                                                        |
| 6       | 12          | 230        | Morningstar SunSaver SS-6L-15V                      | Phaesun C. 2016/2017                                                                                                        |
| 10      | 12          | 230        | Morningstar SunSaver SS-10L-12V                     | Phaesun C. 2016/2017                                                                                                        |
| 20      | 12          | 230        | Morningstar SunSaver SS-20L-12V                     | Phaesun C. 2016/2017                                                                                                        |
| 10      | 24          | 230        | Morningstar SunSaver SS-10L-24V                     | Phaesun C. 2016/2017                                                                                                        |
| 20      | 24          | 230        | Morningstar SunSaver SS-20L-24V                     | Phaesun C. 2016/2017                                                                                                        |
| 5       | 12/24       | 150        | Phocos CIS05                                        | Phaesun C. 2016/2017                                                                                                        |
| 5       | 12/24       | 150        | Phocos CIS05 2L                                     | Phaesun C. 2016/2017                                                                                                        |
| 10      | 12/24       | 150        | Phocos CIS10                                        | Phaesun C. 2016/2017                                                                                                        |
| 10      | 12/24       | 150        | Phocos CIS10 2L                                     | Phaesun C. 2016/2017                                                                                                        |
| 20      | 12/24       | 150        | Phocos CIS20                                        | Phaesun C. 2016/2017                                                                                                        |
| 20      | 12/24       | 150        | Phocos CIS20 2L                                     | Phaesun C. 2016/2017                                                                                                        |
| 5       | 12/24       | 210        | Phocos CIS LED 5A                                   | Phaesun C. 2016/2017                                                                                                        |
| 10      | 12/24       | 210        | Phocos CIS-N-LED 10A                                | Phaesun C. 2016/2017                                                                                                        |
| 20      | 12/24       | 250        | Phocos CIS-N-LED-1050 20A                           | Phaesun C. 2016/2017                                                                                                        |
| 20      | 12/24       | 250        | Phocos CISN-LED-2800 20A                            | Phaesun C. 2016/2017                                                                                                        |
| 10      | 12          | 110        | Phocos ECO 10                                       | Phaesun C. 2016/2017                                                                                                        |
| 14      | 12          | 160        | Phocos Ecoterm 14                                   | Phaesun C. 2016/2017                                                                                                        |
| 10      | 12/24       | 130        | Phocos CMLup 10                                     | Phaesun C. 2016/2017                                                                                                        |
| 20      | 12/24       | 130        | Phocos CMLup 20                                     | Phaesun C. 2016/2017                                                                                                        |
| 30      | 12/24       | 420        | Phocos Cmsolid 30A                                  | Phaesun C. 2016/2017                                                                                                        |
| 12      | 12          | 900        | Schneider Electric C series - charge controller C12 | <a href="http://www.ops-ecat.schneider-electric.com/ecatalogue/">http://www.ops-ecat.schneider-electric.com/ecatalogue/</a> |
| 3       | 12          | 270        | Schneider Electric AEH-SCC01-3A                     | <a href="http://www.ops-ecat.schneider-electric.com/ecatalogue/">http://www.ops-ecat.schneider-electric.com/ecatalogue/</a> |
| 6       | 12          | 210        | Schneider Electric AEH-SCC04-6A-BD                  | <a href="http://www.ops-ecat.schneider-electric.com/ecatalogue/">http://www.ops-ecat.schneider-electric.com/ecatalogue/</a> |
| 6       | 12          | 280        | Schneider Electric                                  | <a href="http://www.ops-ecat.schneider-electric.com/">http://www.ops-ecat.schneider-electric.com/</a>                       |

| Current | Voltage [V] | Weight [g] | Company                                | Source                                                                                                                                     |
|---------|-------------|------------|----------------------------------------|--------------------------------------------------------------------------------------------------------------------------------------------|
| 10      | 12          | 300        | AEH-SCC05-6A-BD<br>Schneider Electric  | ecatalogue/<br><a href="http://www.ops-ecat.schneider-electric.com/ecatalogue/">http://www.ops-ecat.schneider-electric.com/ecatalogue/</a> |
| 10      | 12          | 290        | AEH-SCC06-10A-BD<br>Schneider Electric | ecatalogue/<br><a href="http://www.ops-ecat.schneider-electric.com/ecatalogue/">http://www.ops-ecat.schneider-electric.com/ecatalogue/</a> |

**Table 7.** Physical Properties of Solar Lanterns

| Company                               | Usage                                             | Wattage [W] | Battery Type | Battery Capacity (mAh) | Weight [g] | Source                                                                                                                                    |
|---------------------------------------|---------------------------------------------------|-------------|--------------|------------------------|------------|-------------------------------------------------------------------------------------------------------------------------------------------|
| Pico PV Lamp Niwa Uno 50              | Lighting                                          | 0,5         | LiFePO4      | 400                    | 280        | Phaesun C. 2016/2017                                                                                                                      |
| Pico PV Lamp Niwa Multi 300 XL        | Lighting + USB Charging                           | 3           | LiFePO4      | 3000                   | 1170       | Phaesun C. 2016/2017                                                                                                                      |
| Modular Solar System Niwa Home 200 X2 | Lighting + USB Charging                           | 5           | LiFePO4      | 3000                   | 3250       | Phaesun C. 2016/2017                                                                                                                      |
| JouLite Kits 1                        | Lighting + USB Charging                           | 1,8         |              | 2250                   | 550        | Phaesun C. 2016/2017                                                                                                                      |
| JouLite Kits 2                        | Lighting (2Lamps) + USB Charging                  | 1,8         |              | 2250                   | 650        | Phaesun C. 2016/2017                                                                                                                      |
| T-lite 180 1 Lightkit                 | Lighting (1 Lamp)                                 | 3           | LiCoO2       | 4500                   | 1700       | Phaesun C. 2016/2017                                                                                                                      |
| T-lite 180 2 Lightkit                 | Lighting (2 Lamp)                                 | 6           | LiCoO2       | 4500                   | 2600       | Phaesun C. 2016/2017                                                                                                                      |
| T-lite 180 3 Lightkit                 | Lighting (3 Lamp)                                 | 9           | LiCoO2       | 4500                   | 3600       | Phaesun C. 2016/2017                                                                                                                      |
| T-lite 180 4 Lightkit                 | Lighting (4 Lamp)                                 | 12          | LiCoO2       | 4500                   | 4700       | Phaesun C. 2016/2017                                                                                                                      |
| 1 Ulitium Kits                        | Lighting (1 Lamp) + USB Charging                  | 3           | LiCoO2       | 4500                   | 1700       | Phaesun C. 2016/2017                                                                                                                      |
| 2 Ulitium Kits                        | Lighting (2 Lamp) + USB Charging                  | 6           | LiCoO2       | 4500                   | 2600       | Phaesun C. 2016/2017                                                                                                                      |
| 3 Ulitium Kits                        | Lighting (3 Lamp) + USB Charging                  | 9           | LiCoO2       | 4500                   | 3600       | Phaesun C. 2016/2017                                                                                                                      |
| 4 Ulitium Kits                        | Lighting (4 Lamp) + USB Charging                  | 12          | LiCoO2       | 4500                   | 4700       | Phaesun C. 2016/2017                                                                                                                      |
| WakaWaka Base 10                      | Lighting (2 Lamps + 1 Light Torch) + USB Charging | 10          | LiPo         | 10000                  | 1880       | <a href="https://za.waka-waka.com/store/catalogue/wakawaka-base-10_31/">https://za.waka-waka.com/store/catalogue/wakawaka-base-10_31/</a> |

| Company          | Usage                            | Wattage [W] | Battery Type | Battery Capacity (mAh) | Weight [g] | Source                                                                                                                          |
|------------------|----------------------------------|-------------|--------------|------------------------|------------|---------------------------------------------------------------------------------------------------------------------------------|
| WakaWaka Light   | Lighting (1 Lamp + USB Charging) | 0,75        | NiMh         | 800                    | 130        | <a href="https://waka-waka.com/store/catalogue/wakawaka-light_15/">https://waka-waka.com/store/catalogue/wakawaka-light_15/</a> |
| Fosera PSHS 2800 | 4 Loads + USB                    | 1,5         | LiFePO4      | 2800                   | 390        | <a href="http://www.fosera.com/downloads/data-sheets.html">http://www.fosera.com/downloads/data-sheets.html</a>                 |
| Fosera PSHS 4200 | 4 Loads + USB                    | 2,5         | LiFePO4      | 4200                   | 410        | <a href="http://www.fosera.com/downloads/data-sheets.html">http://www.fosera.com/downloads/data-sheets.html</a>                 |
| Fosera PSHS 7000 | 4 Loads + USB                    | 6           | LiFePO4      | 7200                   | 500        | <a href="http://www.fosera.com/downloads/data-sheets.html">http://www.fosera.com/downloads/data-sheets.html</a>                 |

**Table 8.** Solar Lanterns and Pico Solar Systems

| Liters | Voltage [V] | Weight [kg] | Article                            | Source                                                                                              |
|--------|-------------|-------------|------------------------------------|-----------------------------------------------------------------------------------------------------|
| 14     | 12/24       | 11,5        | Engel Portable cooling box MD14-F  | Phaesun C. 2016/2017                                                                                |
| 15     | 12/24       | 16          | Engel Portable cooling box MT17-F  | Phaesun C. 2016/2017                                                                                |
| 21     | 12/24       | 17          | Engel Portable cooling box MT27-F  | Phaesun C. 2016/2017                                                                                |
| 25     | 12/24       | 13          | Wemo E25                           | <a href="http://www.wemo.ch/download/catalogEng.pdf">http://www.wemo.ch/download/catalogEng.pdf</a> |
| 26     | 12/24       | 18          | WEMO 200                           | <a href="http://www.wemo.ch/download/catalogEng.pdf">http://www.wemo.ch/download/catalogEng.pdf</a> |
| 32     | 12/24       | 21          | Engel Portable cooling box MT35-F  | Phaesun C. 2016/2017                                                                                |
| 32     | 12/24       | 21          | Engel Portable cooling box MT35-FS | Phaesun C. 2016/2017                                                                                |
| 40     | 12/24       | 24          | Engel Portable cooling box MT45-F  | Phaesun C. 2016/2017                                                                                |
| 40     | 12/24       | 24          | Engel Portable cooling box MT45-FS | Phaesun C. 2016/2017                                                                                |
| 40     | 12/24       | 22          | Engel Portable cooling box MR040   | Phaesun C. 2016/2017                                                                                |
| 41     | 12/24       | 22,5        | WEMO 26                            | <a href="http://www.wemo.ch/download/catalogEng.pdf">http://www.wemo.ch/download/catalogEng.pdf</a> |
| 42     | 12/24       | 14,9        | WEMO 42                            | <a href="http://www.wemo.ch/download/catalogEng.pdf">http://www.wemo.ch/download/catalogEng.pdf</a> |
| 45     | 12/24       | 16,7        | Wemo E45                           | <a href="http://www.wemo.ch/download/catalogEng.pdf">http://www.wemo.ch/download/catalogEng.pdf</a> |

| Liters | Voltage [V]       | Weight [kg] | Article                            | Source                                                                                                                                                                                                                                                                                                                      |
|--------|-------------------|-------------|------------------------------------|-----------------------------------------------------------------------------------------------------------------------------------------------------------------------------------------------------------------------------------------------------------------------------------------------------------------------------|
| 48     | 12 (DC) and AC    | 13,2        | Solageo TWB-BCH-48ACDC             | <a href="http://www.solageo.com/ProductResourceFiles/BUABZWQRGPXQ.pdf">http://www.solageo.com/ProductResourceFiles/BUABZWQRGPXQ.pdf</a>                                                                                                                                                                                     |
| 50     | 12/24             | 17          | Frigor FHK 50 12-24 V              | <a href="http://order.phaesun.com/index.php/loads-40891/refrigeratorandfreezerboxes-40910/frigorfridgesandfreezers-46779/refrigerator-frigor-fhk-50-12-24v.html">http://order.phaesun.com/index.php/loads-40891/refrigeratorandfreezerboxes-40910/frigorfridgesandfreezers-46779/refrigerator-frigor-fhk-50-12-24v.html</a> |
| 50     | 10-31             | 34          | Sundanzer DCR50                    | <a href="http://www.sundanzer.com/app/uploads/2016/03/SunDanzer-Main.pdf">http://www.sundanzer.com/app/uploads/2016/03/SunDanzer-Main.pdf</a>                                                                                                                                                                               |
| 50     | 12/24             | 34          | Onergy ONCool                      | GIZ DC Appliances Catalog                                                                                                                                                                                                                                                                                                   |
| 50     | 12                | 17,8        | Solageo TWB-BC-50                  | <a href="http://www.solageo.com/ProductResourceFiles/XVWPVEQQXSJT.pdf">http://www.solageo.com/ProductResourceFiles/XVWPVEQQXSJT.pdf</a>                                                                                                                                                                                     |
| 51     | 12/24             | 18          | WEMO 51                            | <a href="http://www.wemo.ch/download/catalogEng.pdf">http://www.wemo.ch/download/catalogEng.pdf</a>                                                                                                                                                                                                                         |
| 60     | 12/24             | 31          | Engel Portable cooling box MD60-FC | Phaesun C. 2016/2017                                                                                                                                                                                                                                                                                                        |
| 60     | 12/24             | 28          | WEMO 60 GTA                        | <a href="http://www.wemo.ch/download/catalogEng.pdf">http://www.wemo.ch/download/catalogEng.pdf</a>                                                                                                                                                                                                                         |
| 60     | 12/24             | 18,9        | WEMO 66                            | <a href="http://www.wemo.ch/download/catalogEng.pdf">http://www.wemo.ch/download/catalogEng.pdf</a>                                                                                                                                                                                                                         |
| 62     | 12/24             | 18          | WEMO 62                            | <a href="http://www.wemo.ch/download/catalogEng.pdf">http://www.wemo.ch/download/catalogEng.pdf</a>                                                                                                                                                                                                                         |
| 73     | 12/24             | 34          | WEMO WL 73 P                       | <a href="http://www.wemo.ch/download/catalogEng.pdf">http://www.wemo.ch/download/catalogEng.pdf</a>                                                                                                                                                                                                                         |
| 75     | 12/24             | 21,8        | WEMO 76                            | <a href="http://www.wemo.ch/download/catalogEng.pdf">http://www.wemo.ch/download/catalogEng.pdf</a>                                                                                                                                                                                                                         |
| 80     | 12/24 (DC) and AC | 29          | Engel Fridge CK-100                | <a href="https://solarkontor.de/Engel-Kuehlbox-CK-100-Kompressor-Kuehlschrank [xxx]">https://solarkontor.de/Engel-Kuehlbox-CK-100-Kompressor-Kuehlschrank [xxx]</a>                                                                                                                                                         |
| 90     | 12/24             | 26          | WEMO 85                            | <a href="http://www.wemo.ch/download/catalogEng.pdf">http://www.wemo.ch/download/catalogEng.pdf</a>                                                                                                                                                                                                                         |
| 96     | 12/24             | 26          | WEMO 96                            | <a href="http://www.wemo.ch/download/catalogEng.pdf">http://www.wemo.ch/download/catalogEng.pdf</a>                                                                                                                                                                                                                         |
| 99     | 12/24             | 25,5        | WEMO WL 91                         | <a href="http://www.wemo.ch/download/catalogEng.pdf">http://www.wemo.ch/download/catalogEng.pdf</a>                                                                                                                                                                                                                         |
| 103    | 12/24             | 30          | Frigor FHC 85 12-24V               | <a href="http://order.phaesun.com/index.php/refrigerator-frigor-fhc-85-12-24v.html">http://order.phaesun.com/index.php/refrigerator-frigor-fhc-85-12-24v.html</a>                                                                                                                                                           |
| 133    | 12/24             | 26          | WEMO 106                           | <a href="http://www.wemo.ch/download/catalogEng.pdf">http://www.wemo.ch/download/catalogEng.pdf</a>                                                                                                                                                                                                                         |
| 134    | 12/24             | 28,3        | WEMO WL 152                        | <a href="http://www.wemo.ch/download/catalogEng.pdf">http://www.wemo.ch/download/catalogEng.pdf</a>                                                                                                                                                                                                                         |
| 143    | 12/24             | 36          | WEMO WL 160                        | <a href="http://www.wemo.ch/download/catalogEng.pdf">http://www.wemo.ch/download/catalogEng.pdf</a>                                                                                                                                                                                                                         |

| Liters | Voltage [V] | Weight [kg] | Article                                | Source                                                                                                                                                                                            |
|--------|-------------|-------------|----------------------------------------|---------------------------------------------------------------------------------------------------------------------------------------------------------------------------------------------------|
| 165    | 12/24       | 51          | Phocos FR165R/F                        | <a href="http://www.phocos.com/wp-content/uploads/Product/Information/Library/Datasheet_FR_ENG.pdf">http://www.phocos.com/wp-content/uploads/Product/Information/Library/Datasheet_FR_ENG.pdf</a> |
| 165    | 10-31       | 54,4        | Sundanzer DCR165                       | <a href="http://www.sundanzer.com/app/uploads/2016/03/SunDanzer-Main.pdf">http://www.sundanzer.com/app/uploads/2016/03/SunDanzer-Main.pdf</a>                                                     |
| 165    | 12/24       | 59          | Onergy ONCool                          | GIZ DC Appliances Catalog                                                                                                                                                                         |
| 166    | 12/24       | 47          | Steca Solar Refrigerator/Freezer PF166 | Phaesun C. 2016/2017                                                                                                                                                                              |
| 212    | 12/24       | 17          | Frigor FHK 142 12-24 V                 | <a href="http://order.phaesun.com/index.php/refrigerator-frigor-fhc-142-12-24v.html">http://order.phaesun.com/index.php/refrigerator-frigor-fhc-142-12-24v.html</a>                               |
| 225    | 12/24       | 59          | Phocos FR225R/F                        | <a href="http://www.phocos.com/wp-content/uploads/Product/Information/Library/Datasheet_FR_ENG.pdf">http://www.phocos.com/wp-content/uploads/Product/Information/Library/Datasheet_FR_ENG.pdf</a> |
| 225    | 10-31       | 63,5        | Sundazner DCR225                       | <a href="http://www.sundanzer.com/app/uploads/2016/03/SunDanzer-Main.pdf">http://www.sundanzer.com/app/uploads/2016/03/SunDanzer-Main.pdf</a>                                                     |
| 240    | 12/24       | 62          | Steca Solar Refrigerator/Freezer PF240 | Phaesun C. 2016/2017                                                                                                                                                                              |
| 317    | 12/24       | 53          | WEMO WL270                             | <a href="http://www.wemo.ch/download/catalogEng.pdf">http://www.wemo.ch/download/catalogEng.pdf</a>                                                                                               |

**Table 9.** Physical Properties of Off-Grid Solar Fans

| Article                   | Watt age [W] | Volt age [V] | Weight [kg] | Type     | Source                                                                                                                                                      |
|---------------------------|--------------|--------------|-------------|----------|-------------------------------------------------------------------------------------------------------------------------------------------------------------|
| Phaesun Cool Breeze 12 RC | 3 - 18       | 12           | 3           | Ceiling  | Phaesun C. 2016/2017                                                                                                                                        |
| Phaesun Cool Breeze 24    | 19           | 24           | 4,65        | Ceiling  | Phaesun C. 2016/2017                                                                                                                                        |
| Phaesun Cool Breeze RC 24 | 19           | 24           | 4,65        | Ceiling  | Phaesun C. 2016/2017                                                                                                                                        |
| Phaesun Table Fast Breeze | 2,7 - 10,4   | 12           | 2,1         | Table    | Phaesun C. 2016/2017                                                                                                                                        |
| Fosera Ceiling Fan 40     | 4            | 12 - 14      | 0,374       | Ceiling  | <a href="http://www.fosera.com/products/power-line/applications.html">http://www.fosera.com/products/power-line/applications.html</a> [accessed 06.12.2016] |
| Sundaya Ceiling Fan500    | 5,5          | 12 - 18      | 0,2         | Ceiling  | <a href="http://sundaya.com/files/Sundaya_JouleBox_datasheets_July2016.pdf">http://sundaya.com/files/Sundaya_JouleBox_datasheets_July2016.pdf</a>           |
| Fosera Ceiling Fan 50     | 4            | 13           | 0,41        | Ceiling  | <a href="http://www.fosera.com/downloads/data-sheets.html">http://www.fosera.com/downloads/data-sheets.html</a>                                             |
| Fan Onergy                | 15           | 12           | 5,5         | Standing | GIZ DC Product Catalog                                                                                                                                      |

| Article                       | Watt<br>age<br>[W] | Volt<br>age<br>[V] | Weight [kg] | Type     | Source                                                                                                                                                                |
|-------------------------------|--------------------|--------------------|-------------|----------|-----------------------------------------------------------------------------------------------------------------------------------------------------------------------|
| Pedestal Fan                  |                    |                    |             |          |                                                                                                                                                                       |
| BBOX 12"<br>FAN               | 10                 | 12                 | 2           | Standing | <a href="http://buenpower.com/pdf/ventilador.pdf">http://buenpower.com/pdf/ventilador.pdf</a>                                                                         |
| OmniVoltaic<br>16in Stand Fan | 10                 | 12                 | 4,5         | Standing | <a href="http://www.omnivoltaic.com/wp-content/uploads/2014/03/spsf-16_datasheet.pdf">http://www.omnivoltaic.com/wp-content/uploads/2014/03/spsf-16_datasheet.pdf</a> |

**Table 10** Physical properties of off-grid solar DC TVs

| Type        | Wattage<br>[W] | Size<br>[in] | Voltage [V] | Weight<br>[kg] | Article                                  | source                                                                                                                                                                                            |
|-------------|----------------|--------------|-------------|----------------|------------------------------------------|---------------------------------------------------------------------------------------------------------------------------------------------------------------------------------------------------|
| LED         | 16             | 15           | 12          | 3,1            | alphatronics                             | Phaesun C. 2014/2015                                                                                                                                                                              |
| LED         | 19             | 19           | 12          | 3,1            | Mobisol                                  | company information                                                                                                                                                                               |
| LED         | 24             | 24           | 12          | 4,2            | Mobisol                                  | company information                                                                                                                                                                               |
| LED         | 6              | 15,6         | 12          | 2,21           | Fosera                                   | Data Sheet Product                                                                                                                                                                                |
| LED         | 8              | 15,6         | 12          | 1,5            | Niwa Solar ELED<br>TV Niwa 15,6"         | Phaesun C. 2016/2017                                                                                                                                                                              |
| LED         | 19             | 19           | 12/24       | 3,7            | alphatronics<br>R-19eWDSB                | Phaesun C. 2014/2015<br>catalog                                                                                                                                                                   |
| LED         | 23             | 22           | 12/24       | 4,2            | alphatronics<br>R-22eWDSB                | Phaesun C. 2014/2015<br>catalog                                                                                                                                                                   |
| LED         | 26             | 24           | 12/24       | 5              | alphatronics<br>R-24eWDSB                | Phaesun C. 2014/2015                                                                                                                                                                              |
| LCD-<br>TFT | 12             | 14           | 12          | 2,64           | Omnivoltaic<br>ovCamp™ 12V<br>DC TV 14in | <a href="http://www.omnivoltaic.com/wp-content/uploads/2014/03/SPM-14_datasheet.pdf">http://www.omnivoltaic.com/wp-content/uploads/2014/03/SPM-14_datasheet.pdf</a>                               |
| LCD-<br>TFT | 10             | 19           | 12          | 3,4            | Omnivoltaic<br>ovCamp™ 12V<br>DC TV 19in | <a href="http://www.omnivoltaic.com/wp-content/uploads/2014/03/SPM-19_datasheet.pdf">http://www.omnivoltaic.com/wp-content/uploads/2014/03/SPM-19_datasheet.pdf</a>                               |
| LED         | 8              | 15,6         | 12          | 2,2            | Solargeo<br>TWB-TVE1603A                 | <a href="http://www.solageo.com/ProductResourceFiles/PXASRJSFSZUC.pdf">http://www.solageo.com/ProductResourceFiles/PXASRJSFSZUC.pdf</a>                                                           |
| LED         | 30             | 18,6         | 12          | 3,4            | Solargeo<br>TWB-TVE1801A                 | <a href="http://www.solageo.com/ProductResourceFiles/VJDOESVNHKNS.pdf">http://www.solageo.com/ProductResourceFiles/VJDOESVNHKNS.pdf</a>                                                           |
| LED         | 35             | 24           | 12          | 4,8            | Solargeo<br>TWB-TVE2315A                 | <a href="http://www.solageo.com/ProductResourceFiles/XNYBVSXFUSIN.pdf">http://www.solageo.com/ProductResourceFiles/XNYBVSXFUSIN.pdf</a>                                                           |
| LED         | 10             | 15,6         | 12 DC .     | 1,7            | MAKS Solar LED<br>Television             | <a href="http://www.maksgroupbd.com/temp/MS40MjI3OTA3NDE1OUUrMTM_3D/MS40MjI3OTA3NDE1OUUrMTM_3D.pdf">http://www.maksgroupbd.com/temp/MS40MjI3OTA3NDE1OUUrMTM_3D/MS40MjI3OTA3NDE1OUUrMTM_3D.pdf</a> |
| LCD-<br>TFT | 12             | 14           | 12          | 2,64           | OmniVoltaic 14,1"<br>Solar TV            | <a href="http://www.omnivoltaic.com/wp-content/uploads/2014/03/SPM-14_datasheet.pdf">http://www.omnivoltaic.com/wp-content/uploads/2014/03/SPM-14_datasheet.pdf</a>                               |

| Type    | Wattage [W] | Size [in] | Voltage [V] | Weight [kg] | Article                    | source                                                                                                                                                                          |
|---------|-------------|-----------|-------------|-------------|----------------------------|---------------------------------------------------------------------------------------------------------------------------------------------------------------------------------|
| LCD-TFT | 10          | 18,5      | 12          | 3,4         | OmniVoltaic 19 " Solar TV  | heet.pdf<br><a href="http://www.omnivoltaic.com/wp-content/uploads/2014/03/SPM-19_datasheet.pdf">http://www.omnivoltaic.com/wp-content/uploads/2014/03/SPM-19_datasheet.pdf</a> |
| LED     | 13          | 16        | 12          | 3,5         | Barfoot Power 16" Solar TV | <a href="http://www.amazon.in/Barefoot-Power-12V-Digital-Player/dp/B01LQCP5K0">http://www.amazon.in/Barefoot-Power-12V-Digital-Player/dp/B01LQCP5K0</a>                         |

**Table 11** Physical properties of cables for off-grid solar products

| Product                                                                 | Length | Weight | Source               |
|-------------------------------------------------------------------------|--------|--------|----------------------|
| Phaesun Load Cable Extension /5 Solar Side                              | 5      | 0.18   | Phaesun C. 2016/2017 |
| Phaesun Load Cable /0,4 Solar Side                                      | 0,4    | 0.01   | Phaesun C. 2016/2017 |
| Phaesun Load Cable Extension /3 Solar Side                              | 3      | 0.12   | Phaesun C. 2016/2017 |
| Phaesun Load Cable E27 /5 Solar Side                                    | 5      | 0.19   | Phaesun C. 2016/2017 |
| Phaesun Load Cable E27 /9 Solar Side                                    | 9      | 0.43   | Phaesun C. 2016/2017 |
| Phaesun Load Cable Illu /5 Solar Side                                   | 5      | 0.22   | Phaesun C. 2016/2017 |
| Phaesun Load Cable E27 /3 Solar Side                                    | 3      | 0.15   | Phaesun C. 2016/2017 |
| Phaesun Load Cable Extension /1,3 Solar Side                            | 1.3    | 0.08   | Phaesun C. 2016/2017 |
| Load Cable Illu /5                                                      | 5      | 0.21   | Phaesun C. 2016/2017 |
| Load Cable 3X /3 Solar Side                                             | 3      | 0.14   | Phaesun C. 2016/2017 |
| Extension Cable Phaesun High Drive 3M 1X                                | 3      | 0.06   | Phaesun C. 2016/2017 |
| DC Cable 360 Cm Sundaya With Bayonet Plug                               | 3.6    | 0.1    | Phaesun C. 2016/2017 |
| DC Cable 120 Cm Sundaya With Bayonet Plug                               | 1.2    | 0.05   | Phaesun C. 2016/2017 |
| DC Cable 240 Cm Sundaya With Bayonet Plug                               | 2.4    | 0.1    | Phaesun C. 2016/2017 |
| DC Cable 480 Cm Sundaya With Bayonet Plug                               | 4.8    | 0.15   | Phaesun C. 2016/2017 |
| DC Cable 600 Cm Sundaya With Bayonet Plug                               | 6      | 0.20   | Phaesun C. 2016/2017 |
| Cable Drop Light Fitting E27 12 VDC                                     | 0.7    | 0.1    | Phaesun C. 2016/2017 |
| Battery Cable With 20A Fuse No Clamp, With Ring Terminal M8             | 1.5    | 0.4    | Phaesun C. 2016/2017 |
| Battery Cable 1.5m 16 mm <sup>2</sup> incl. Battery Terminal Clamps +/- | 1,5    | 1.1    | Phaesun C. 2016/2017 |
| Battery Cable 1,5 M 25 Mm <sup>2</sup>                                  | 1.5    | 1.2    | Phaesun C. 2016/2017 |
| Battery Cable With 15A Fuse No Clamp, With Ring Terminal M8             | 1.5    | 0.35   | Phaesun C. 2016/2017 |



5. S5: Linear Regression of the weight of pv-panels and lead-acid batteries over capacity

S5. Linear regression of weight of Lead-Acid batteries used for solar off-grid products based on market review data; (b) Linear Regression of weight of PV panels used for solar off-grid products based on market review data.

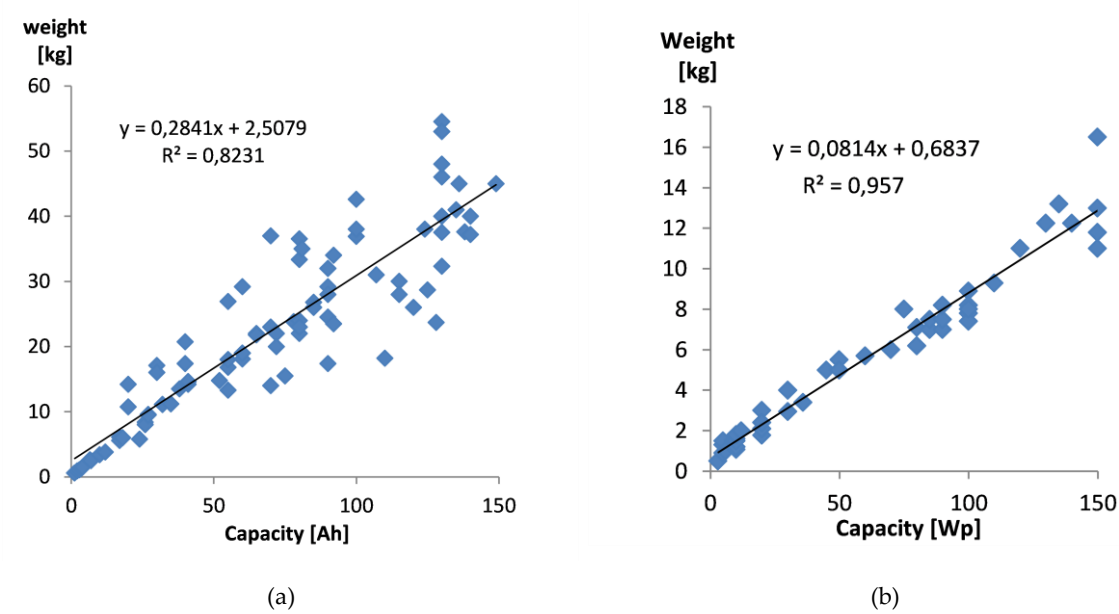

6. S6: Distribution of SHS capacity within the surveyed sample

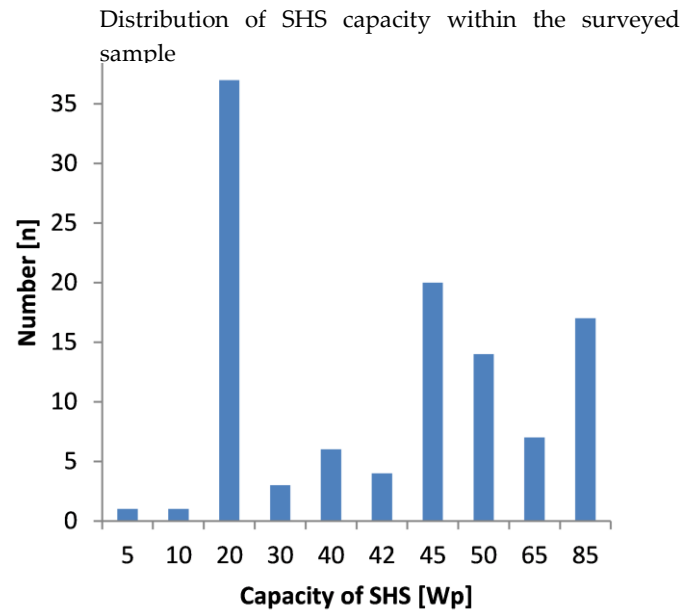

### 7. S7: Modelling assumptions and used literature values.

For grid connected households almost exclusively literature values from the Global E-Waste Monitor were used. For households with Solar Home Systems, several assumptions had to be taken.

| Type of EEE                                                      | chosen value [kg] | Source      | Assumption                                                                                                                                                                                                                                                                                                                                                                                                                                                                                                                                                                             |
|------------------------------------------------------------------|-------------------|-------------|----------------------------------------------------------------------------------------------------------------------------------------------------------------------------------------------------------------------------------------------------------------------------------------------------------------------------------------------------------------------------------------------------------------------------------------------------------------------------------------------------------------------------------------------------------------------------------------|
| Lighting point                                                   | 0.1               | GEM         | To the extent of the knowledge of the author, there are only light bulbs, light tubes and no combination of bulb and shading in use                                                                                                                                                                                                                                                                                                                                                                                                                                                    |
| Mobile Phone                                                     | 0.1               | GEM         | Regular mobile phone                                                                                                                                                                                                                                                                                                                                                                                                                                                                                                                                                                   |
| Phone Charger                                                    | 0.13              | GEM         | Regular mobile phone charger                                                                                                                                                                                                                                                                                                                                                                                                                                                                                                                                                           |
| BW TV                                                            | 8.0               | *           | Black and White TVs were almost exclusively found in SHS households. They used to be 20 W CRT-TVs. Newer SHS will exclusively be distributed with LED color TVs. It is hard to assess small CRT TVs, as they are not sold in high numbers. One product was found at Amazon India <a href="http://www.amazon.in/Bipl-14-CRT-TV-Conventional/dp/B01L8N22US/ref=sr_1_1?ie=UTF8&amp;qid=1492754135&amp;sr=8-1&amp;keywords=crt+tv+14+inch">http://www.amazon.in/Bipl-14-CRT-TV-Conventional/dp/B01L8N22US/ref=sr_1_1?ie=UTF8&amp;qid=1492754135&amp;sr=8-1&amp;keywords=crt+tv+14+inch</a> |
| Color TV                                                         | 21.35             | GEM         | The ratio between CRT TVs and LCD/LED TVs was assumed to be 1:1. Any added new TV will be an LCD/LED TV.                                                                                                                                                                                                                                                                                                                                                                                                                                                                               |
| Electric Fan                                                     | 2.7               | S3 Table 8  | It was assumed, that all fans in rural Bangladesh follow the properties of off-grid fans.                                                                                                                                                                                                                                                                                                                                                                                                                                                                                              |
| Computer                                                         | 9.4               | GEM         | The Value from the Global E-Waste Monitor was chosen                                                                                                                                                                                                                                                                                                                                                                                                                                                                                                                                   |
| Refrigerator                                                     | 54.1              | GEM         | "                                                                                                                                                                                                                                                                                                                                                                                                                                                                                                                                                                                      |
| Rice Cooker                                                      | 2.6               | GEM         | "                                                                                                                                                                                                                                                                                                                                                                                                                                                                                                                                                                                      |
| Iron                                                             | 0.8               | GEM         | "                                                                                                                                                                                                                                                                                                                                                                                                                                                                                                                                                                                      |
| Sound box                                                        | 2.1               | GEM         | "                                                                                                                                                                                                                                                                                                                                                                                                                                                                                                                                                                                      |
| Battery Cable                                                    | 1                 | S3 Table 10 | The average weight of the battery cable was assumed to be 1 kg                                                                                                                                                                                                                                                                                                                                                                                                                                                                                                                         |
| TV HH <sub>SHS+G</sub>                                           |                   | Assumption  | Based on the results for HH <sub>G</sub> and HH <sub>SHS</sub> it was assumed, that the black and white TV are powered by a SHS and the color TVs by the grid.                                                                                                                                                                                                                                                                                                                                                                                                                         |
| Appliance cable                                                  | 0.13              | S3 Table 10 | The average weight of the cables was calculated to be 0.13 kg. Every appliance found in a HH was assumed to be connected with one cable                                                                                                                                                                                                                                                                                                                                                                                                                                                |
| Households without primary access to electricity HH <sub>0</sub> | 0                 | Assumption  | Based on the possession data for HH <sub>G</sub> and HH <sub>SHS</sub> , it can be assumed, that HH <sub>0</sub> do not possess any EEE in significant numbers.                                                                                                                                                                                                                                                                                                                                                                                                                        |

## 8. S8: Statistical Distribution of the in-use stocks by different clusters

**Table 12.** Statistical distribution of the in-use stocks clustered by Tier Status using the Supply Simple 2015 algorithm

| Supply Simple 2015 | n   | min | Quartile (1/4) | Median | Quartile (3/4) | max   |
|--------------------|-----|-----|----------------|--------|----------------|-------|
| Tier 0             | 57  | 0.1 | 0.1            | 0.1    | 0.1            | 3.4   |
| Tier 1             | 23  | 0.3 | 1.4            | 3.4    | 6.8            | 11.9  |
| Tier 2             | 134 | 0.1 | 0.9            | 3.6    | 9.4            | 149.6 |
| Tier 3             | 17  | 0.1 | 0.1            | 5.0    | 28.8           | 182.1 |
| Tier 4             | 0   | 0.0 | 0.0            | 0.0    | 0.0            | 0.0   |
| Tier 5             | 0   | 0.0 | 0.0            | 0.0    | 0.0            | 0.0   |

**Table 13** Statistical distribution of the in-use stocks clustered by Tier Status using appliance ownership algorithm

| Appliance | n  | min | Quartile (1/4) | Median | Quartile (3/4) | max   |
|-----------|----|-----|----------------|--------|----------------|-------|
| NA        | 63 | 0.0 | 0.1            | 0.1    | 0.1            | 22.3  |
| Tier 0,5  | 69 | 0.3 | 0.6            | 0.8    | 1.1            | 22.0  |
| Tier 2    | 86 | 3.2 | 3.7            | 4.6    | 12.0           | 182.1 |
| Tier 3    | 0  | 0.0 | 0.0            | 0.0    | 0.0            | 0.0   |
| Tier 4    | 13 | 3.3 | 4.7            | 76.0   | 86.6           | 95.6  |
| Tier 5    | 0  | 0.0 | 0.0            | 0.0    | 0.0            | 0.0   |

**Table 14** Statistical distribution of the in-use stocks clustered by income quintile

| Income Quintile | n  | min | Quartile (1/4) | Median | Quartile (3/4) | max   |
|-----------------|----|-----|----------------|--------|----------------|-------|
| NA              | 6  | 0.0 | 0.0            | 0.0    | 0.0            | 0.0   |
| <0,2            | 51 | 0.1 | 0.1            | 0.3    | 3.4            | 182.1 |
| <0,4            | 67 | 0.1 | 0.1            | 0.8    | 4.1            | 57.4  |
| <0,6            | 18 | 0.1 | 0.1            | 0.8    | 3.9            | 16.7  |
| <0,8            | 53 | 0.1 | 0.7            | 3.4    | 9.5            | 89.0  |
| <1              | 36 | 0.1 | 1.4            | 4.1    | 20.2           | 95.6  |

## 9. S9: Questionnaire of the Access to electricity survey

**INTRODUCTION AND GENERAL INFORMATION**

"Hello, my name is \_\_\_\_\_. We are conducting a survey on behalf of the United International University. This survey is part of a study aimed to measure the access to electricity in Bangladesh. We would like to ask you few questions which will take about 20min. All the answers that you provide will be kept anonymous—only members of the survey team will have access to this information. You can stop the interview at any time, ask me to clarify any question, or ask me to repeat something if you don't understand. Your cooperation is greatly appreciated."

**HOUSEHOLD IDENTIFICATION**

|                                 | CODE                                                                                                                                                                                                              | NAME                 |                                                        |
|---------------------------------|-------------------------------------------------------------------------------------------------------------------------------------------------------------------------------------------------------------------|----------------------|--------------------------------------------------------|
| 1. REGION <sup>1</sup>          | <input type="text"/> <input type="text"/>                                                                                                                                                                         | _____                | GPS COORDINATES OF THE DWELLING:                       |
| 2. UPOZILLA <sup>2</sup>        | <input type="text"/> <input type="text"/>                                                                                                                                                                         | _____                |                                                        |
| 3. VILLAGE                      | <input type="text"/> <input type="text"/>                                                                                                                                                                         | _____                |                                                        |
| 4. WARD #                       | <input type="text"/> <input type="text"/>                                                                                                                                                                         |                      |                                                        |
| 5. UNION PARISHAD               | _____                                                                                                                                                                                                             |                      |                                                        |
| LOCALITY                        | URBAN....1    RURAL....2    PERI-<br>URBAN....3                                                                                                                                                                   | <input type="text"/> | [ ][ ] ° [ ][ ] .<br>[ ][ ][ ] 'N                      |
| 7. NAME OF HOUSEHOLD HEAD:      | _____                                                                                                                                                                                                             |                      | 9.                                                     |
| 8. HOUSEHOLD HEAD PHONE NUMBER: | <input type="text"/> |                      | 10. LONGITUDE (E)<br>[ ][ ] ° [ ][ ] .<br>[ ][ ][ ] 'E |
| Special notes:                  |                                                                                                                                                                                                                   |                      |                                                        |

<sup>1</sup> MA = Manikgnaj; BH = Bhola; LA = Lalmonirhath

<sup>2</sup> RA= Razibpur; TE = Tepra; JH = Jhitka | MO = Monpura; DU = Dularhat Charfashion; TA = Tajumuddin | HA = Hatibandha; KA = Kaliganj Lamonirhat; PA = Patgram

## Multi-tier Framework Questionnaire: Bangladesh

### INTERVIEW DETAILS

11. ENUMERATOR ID:

|  |  |
|--|--|
|  |  |
|--|--|

12. ENUMERATOR  
NAME:

|  |
|--|
|  |
|--|

13. DATE OF INTERVIEW  
[DD/MM/YY]

|  |  |   |  |  |   |  |  |
|--|--|---|--|--|---|--|--|
|  |  | / |  |  | / |  |  |
|--|--|---|--|--|---|--|--|

14. TIME INTERVIEW  
STARTED:

|  |   |
|--|---|
|  | : |
|--|---|

15. TIME INTERVIEW  
ENDED:

|  |   |
|--|---|
|  | : |
|--|---|

## Multi-tier Framework Questionnaire: Bangladesh

### MODULE 0: CHARACTERISTICS OF HOUSEHOLD MEMBERS

| 0.1 | 0.2                                                                                                            | 0.3                                                                   | 0.4                        | 0.5                                                                                                                                                                                                                                           | 0.6                                                                                                                                                                                                                                                                                                                                                 | 0.7                                                                                                                                                                                                                                                                                                                                                                                      | 0.8                                    | 0.9                                                                  |
|-----|----------------------------------------------------------------------------------------------------------------|-----------------------------------------------------------------------|----------------------------|-----------------------------------------------------------------------------------------------------------------------------------------------------------------------------------------------------------------------------------------------|-----------------------------------------------------------------------------------------------------------------------------------------------------------------------------------------------------------------------------------------------------------------------------------------------------------------------------------------------------|------------------------------------------------------------------------------------------------------------------------------------------------------------------------------------------------------------------------------------------------------------------------------------------------------------------------------------------------------------------------------------------|----------------------------------------|----------------------------------------------------------------------|
|     | Please state the names of people who currently live in the household, starting with the head of the household. | Is [NAME] a male or female?<br><br><b>1. MALE</b><br><b>2. FEMALE</b> | How old is [NAME]? (YEARS) | What is the highest level/grade of school that [NAME] has attended? <b>[for age 3 and above only]</b> (ENTER 0 FOR NO SCHOOLING)<br><br>1 NURSERY<br>2 PRIMARY<br>3 POST-PRIMARY<br>4 SECONDARY<br>5 HIGHER SEC.<br>6 UNDERGRAD<br>7 POSTGRAD | What is [NAME]'s current main occupation? (FOR MEMBERS AGES 16-65)<br><br>1 FARMER<br>2 TRANSPORT<br>3 FISHERMAN/FISHMONGER<br>4 SKILLED TRADE (CARPENTRY, MASONRY, WEAVER, ELECTRICIAN, REPAIR WORK)<br>5 BARBER, TAILOR, LAUNDRY<br>6 HAWKER<br>7 DOMESTIC HELP<br>8 UNEMPLOYED<br>9 HOMES BUSINESS<br>10 STUDENT<br>11 NRB<br>12 OTHER (SPECIFY) | What is [NAME]'s current main employment status<br><br>1 WAGE EMPLOYMENT (not including casual day labor)<br>2 NON-FARM SELF EMPLOYMENT (EMPLOYER)<br>3 NON-FARM SELF EMPLOYMENT (OWN-ACCOUNT WORKER)<br>4 NON-FARM SELF-EMPLOYMENT (UNPAID FAMILY WORKER)<br>5 FAMILY FARMING<br>6 CASUAL DAY LABORER<br>7 UNPAID INTERNSHIP<br>8 NOT ENGAGED IN ECONOMIC ACTIVITY<br>9 OTHER (SPECIFY) | What is [NAME] average monthly income? | Is [NAME] a business owner or self-employed/ freelancer in the area? |
|     |                                                                                                                |                                                                       | Year                       | Level                                                                                                                                                                                                                                         |                                                                                                                                                                                                                                                                                                                                                     |                                                                                                                                                                                                                                                                                                                                                                                          | Amount in Tk. per month                | yes/ no                                                              |
| 1   |                                                                                                                |                                                                       |                            |                                                                                                                                                                                                                                               |                                                                                                                                                                                                                                                                                                                                                     |                                                                                                                                                                                                                                                                                                                                                                                          |                                        |                                                                      |
| 2   |                                                                                                                |                                                                       |                            |                                                                                                                                                                                                                                               |                                                                                                                                                                                                                                                                                                                                                     |                                                                                                                                                                                                                                                                                                                                                                                          |                                        |                                                                      |
| 3   |                                                                                                                |                                                                       |                            |                                                                                                                                                                                                                                               |                                                                                                                                                                                                                                                                                                                                                     |                                                                                                                                                                                                                                                                                                                                                                                          |                                        |                                                                      |
| 4   |                                                                                                                |                                                                       |                            |                                                                                                                                                                                                                                               |                                                                                                                                                                                                                                                                                                                                                     |                                                                                                                                                                                                                                                                                                                                                                                          |                                        |                                                                      |
| 5   |                                                                                                                |                                                                       |                            |                                                                                                                                                                                                                                               |                                                                                                                                                                                                                                                                                                                                                     |                                                                                                                                                                                                                                                                                                                                                                                          |                                        |                                                                      |
| 6   |                                                                                                                |                                                                       |                            |                                                                                                                                                                                                                                               |                                                                                                                                                                                                                                                                                                                                                     |                                                                                                                                                                                                                                                                                                                                                                                          |                                        |                                                                      |
| 7   |                                                                                                                |                                                                       |                            |                                                                                                                                                                                                                                               |                                                                                                                                                                                                                                                                                                                                                     |                                                                                                                                                                                                                                                                                                                                                                                          |                                        |                                                                      |
| 8   |                                                                                                                |                                                                       |                            |                                                                                                                                                                                                                                               |                                                                                                                                                                                                                                                                                                                                                     |                                                                                                                                                                                                                                                                                                                                                                                          |                                        |                                                                      |
| 9   |                                                                                                                |                                                                       |                            |                                                                                                                                                                                                                                               |                                                                                                                                                                                                                                                                                                                                                     |                                                                                                                                                                                                                                                                                                                                                                                          |                                        |                                                                      |
| 10  |                                                                                                                |                                                                       |                            |                                                                                                                                                                                                                                               |                                                                                                                                                                                                                                                                                                                                                     |                                                                                                                                                                                                                                                                                                                                                                                          |                                        |                                                                      |

## Multi-tier Framework Questionnaire: Bangladesh

## MODULE A: ACCESS TO ELECTRICITY SUPPLY

| SOURCE & CAPACITY     |                                                                                                                                                                                                                                                                                                        |                                                                                                                                                                                                                                                                                                                                                                                                                                                                                                                                                                                                                                                                                                                                                                                                                                                                                                                                                                                                    |                                                                                                                                                                                                                                                                                                  |          |          |          |         |          |          |         |            |  |  |  |  |  |  |              |  |  |  |  |  |  |
|-----------------------|--------------------------------------------------------------------------------------------------------------------------------------------------------------------------------------------------------------------------------------------------------------------------------------------------------|----------------------------------------------------------------------------------------------------------------------------------------------------------------------------------------------------------------------------------------------------------------------------------------------------------------------------------------------------------------------------------------------------------------------------------------------------------------------------------------------------------------------------------------------------------------------------------------------------------------------------------------------------------------------------------------------------------------------------------------------------------------------------------------------------------------------------------------------------------------------------------------------------------------------------------------------------------------------------------------------------|--------------------------------------------------------------------------------------------------------------------------------------------------------------------------------------------------------------------------------------------------------------------------------------------------|----------|----------|----------|---------|----------|----------|---------|------------|--|--|--|--|--|--|--------------|--|--|--|--|--|--|
| A. 01                 | What is the primary source of electricity in the household?<br><br><i>If answer is 4-5-6 please ask the number of devices in the household</i>                                                                                                                                                         | <input type="checkbox"/> 1. National grid connection from [name of utility] → A.02<br><input type="checkbox"/> 2. Local mini-grid (Specify source) → A.02<br><hr/> <input type="checkbox"/> 3. Fossil fuel based generator → A.02<br><input type="checkbox"/> 4. Solar home system → A.13<br>4a How many? (.....)<br><input type="checkbox"/> 5. Solar lantern → A.13<br>5a How many? (.....)                                                                                                                                                                                                                                                                                                                                                                                                                                                                                                                                                                                                      | <input type="checkbox"/> 6. Rechargeable battery system (e.g. car battery) → A.02<br>6a How many? (.....)<br><input type="checkbox"/> 7. Dry cell battery (Non-rechargeable) → AB.01<br><input type="checkbox"/> 8. No electricity → AB.01<br><input type="checkbox"/> 9. Other (specify): _____ |          |          |          |         |          |          |         |            |  |  |  |  |  |  |              |  |  |  |  |  |  |
| A. 02                 | (Question based on observation: Read the value from the nameplate of the electricity supply equipment or ask for the equipment documentation)                                                                                                                                                          | <input type="checkbox"/> 1. Less than 1 Watt<br><input type="checkbox"/> 2. 1 Watt – 50 Watts<br><input type="checkbox"/> 3. 51 Watts – 500 Watts                                                                                                                                                                                                                                                                                                                                                                                                                                                                                                                                                                                                                                                                                                                                                                                                                                                  | <input type="checkbox"/> 4. 501 Watts – 2000 Watts<br><input type="checkbox"/> 5. More than 2000 Watts<br><input type="checkbox"/> 99. No documentation                                                                                                                                          |          |          |          |         |          |          |         |            |  |  |  |  |  |  |              |  |  |  |  |  |  |
| SEASONALITY           |                                                                                                                                                                                                                                                                                                        |                                                                                                                                                                                                                                                                                                                                                                                                                                                                                                                                                                                                                                                                                                                                                                                                                                                                                                                                                                                                    |                                                                                                                                                                                                                                                                                                  |          |          |          |         |          |          |         |            |  |  |  |  |  |  |              |  |  |  |  |  |  |
| A. 03                 | In the last 3 months, did the number of outages of your primary source of electricity vary across seasons?                                                                                                                                                                                             | <input type="checkbox"/> 1. Yes<br><input type="checkbox"/> 2. No → A.06 [ask all questions based on the last 3 months]                                                                                                                                                                                                                                                                                                                                                                                                                                                                                                                                                                                                                                                                                                                                                                                                                                                                            |                                                                                                                                                                                                                                                                                                  |          |          |          |         |          |          |         |            |  |  |  |  |  |  |              |  |  |  |  |  |  |
| A. 04                 | If yes, which is the most difficult season for electricity performance in your household? Please respond to following questions considering the worst season of the year<br>[ask all next questions based on the worst season]                                                                         | <input type="checkbox"/> 1. Season 1 (month specification)<br><input type="checkbox"/> 2. Season 2 (month specification)                                                                                                                                                                                                                                                                                                                                                                                                                                                                                                                                                                                                                                                                                                                                                                                                                                                                           | <input type="checkbox"/> 3. Season 3 (month specification)<br><input type="checkbox"/> 4. Season 4 (month specification)                                                                                                                                                                         |          |          |          |         |          |          |         |            |  |  |  |  |  |  |              |  |  |  |  |  |  |
| QUALITY OF SUPPLY     |                                                                                                                                                                                                                                                                                                        |                                                                                                                                                                                                                                                                                                                                                                                                                                                                                                                                                                                                                                                                                                                                                                                                                                                                                                                                                                                                    |                                                                                                                                                                                                                                                                                                  |          |          |          |         |          |          |         |            |  |  |  |  |  |  |              |  |  |  |  |  |  |
| A. 05                 | [During the worst season/in the last 3 months] Have any appliances been damaged by electricity supply?                                                                                                                                                                                                 | <input type="checkbox"/> 1. Yes<br><input type="checkbox"/> 2. No                                                                                                                                                                                                                                                                                                                                                                                                                                                                                                                                                                                                                                                                                                                                                                                                                                                                                                                                  |                                                                                                                                                                                                                                                                                                  |          |          |          |         |          |          |         |            |  |  |  |  |  |  |              |  |  |  |  |  |  |
| DURATION OF SUPPLY    |                                                                                                                                                                                                                                                                                                        |                                                                                                                                                                                                                                                                                                                                                                                                                                                                                                                                                                                                                                                                                                                                                                                                                                                                                                                                                                                                    |                                                                                                                                                                                                                                                                                                  |          |          |          |         |          |          |         |            |  |  |  |  |  |  |              |  |  |  |  |  |  |
| A. 06                 | [During the worst season/in the last 3 months] On average, how many hours of electricity do you receive from your primary source <b>each day</b> (per 24 hours)?                                                                                                                                       | <div style="display: flex; align-items: center;"> <div style="border: 1px solid black; width: 30px; height: 30px; margin-right: 5px;"></div> <div style="border: 1px solid black; width: 30px; height: 30px; margin-right: 5px;"></div> <div>[hours] (max 24 hours)</div> </div>                                                                                                                                                                                                                                                                                                                                                                                                                                                                                                                                                                                                                                                                                                                   |                                                                                                                                                                                                                                                                                                  |          |          |          |         |          |          |         |            |  |  |  |  |  |  |              |  |  |  |  |  |  |
| A. 07                 | [During the worst season/in the last 3 months] On average, how many hours of electricity do you receive <b>in the evening, from 6 pm to 10 pm</b> from your primary source each day?                                                                                                                   | <div style="display: flex; align-items: center;"> <div style="border: 1px solid black; width: 30px; height: 30px; margin-right: 5px;"></div> <div style="border: 1px solid black; width: 30px; height: 30px; margin-right: 5px;"></div> <div>[hours] (max 4 hours)</div> </div> <p>(check consistency: number of hours cannot be higher than A.07)</p>                                                                                                                                                                                                                                                                                                                                                                                                                                                                                                                                                                                                                                             |                                                                                                                                                                                                                                                                                                  |          |          |          |         |          |          |         |            |  |  |  |  |  |  |              |  |  |  |  |  |  |
| RELIABILITY OF SUPPLY |                                                                                                                                                                                                                                                                                                        |                                                                                                                                                                                                                                                                                                                                                                                                                                                                                                                                                                                                                                                                                                                                                                                                                                                                                                                                                                                                    |                                                                                                                                                                                                                                                                                                  |          |          |          |         |          |          |         |            |  |  |  |  |  |  |              |  |  |  |  |  |  |
| A. 08                 | [During the worst season/in the last 3 months] On average, how many times do you face unpredictable interruptions of your primary source of electricity per week?<br><br>(Note: <b>unscheduled interruptions</b> are unanticipated disruption when the user would expected the supply to be available) | <div style="display: flex; align-items: center;"> <div style="border: 1px solid black; width: 30px; height: 30px; margin-right: 5px;"></div> <div style="border: 1px solid black; width: 30px; height: 30px; margin-right: 5px;"></div> <div>[number of interruptions per week]</div> </div> <p>[insert 00 if none]</p>                                                                                                                                                                                                                                                                                                                                                                                                                                                                                                                                                                                                                                                                            |                                                                                                                                                                                                                                                                                                  |          |          |          |         |          |          |         |            |  |  |  |  |  |  |              |  |  |  |  |  |  |
| A. 09                 | [During the worst season/in the last 3 months] On average, how long is <b>each</b> unpredictable interruption of your primary source of electricity?                                                                                                                                                   | <div style="display: flex; align-items: center;"> <div style="border: 1px solid black; width: 30px; height: 30px; margin-right: 5px;"></div> <div style="border: 1px solid black; width: 30px; height: 30px; margin-right: 5px;"></div> <div>[hours]</div> <div style="margin: 0 10px;">[hours]</div> <div style="border: 1px solid black; width: 30px; height: 30px; margin-right: 5px;"></div> <div style="border: 1px solid black; width: 30px; height: 30px; margin-right: 5px;"></div> <div>[minutes]</div> </div>                                                                                                                                                                                                                                                                                                                                                                                                                                                                            |                                                                                                                                                                                                                                                                                                  |          |          |          |         |          |          |         |            |  |  |  |  |  |  |              |  |  |  |  |  |  |
| A.10                  | At what time of the day do these interruptions normally occur?                                                                                                                                                                                                                                         | <table border="1" style="width: 100%; border-collapse: collapse; text-align: center;"> <thead> <tr> <th></th> <th>6am-10am</th> <th>10am-2pm</th> <th>2pm-6pm</th> <th>6pm-10pm</th> <th>10pm-2am</th> <th>2am-6am</th> </tr> </thead> <tbody> <tr> <td>schedule d</td> <td></td><td></td><td></td><td></td><td></td><td></td> </tr> <tr> <td>unschedu led</td> <td></td><td></td><td></td><td></td><td></td><td></td> </tr> </tbody> </table>                                                                                                                                                                                                                                                                                                                                                                                                                                                                                                                                                     |                                                                                                                                                                                                                                                                                                  |          | 6am-10am | 10am-2pm | 2pm-6pm | 6pm-10pm | 10pm-2am | 2am-6am | schedule d |  |  |  |  |  |  | unschedu led |  |  |  |  |  |  |
|                       | 6am-10am                                                                                                                                                                                                                                                                                               | 10am-2pm                                                                                                                                                                                                                                                                                                                                                                                                                                                                                                                                                                                                                                                                                                                                                                                                                                                                                                                                                                                           | 2pm-6pm                                                                                                                                                                                                                                                                                          | 6pm-10pm | 10pm-2am | 2am-6am  |         |          |          |         |            |  |  |  |  |  |  |              |  |  |  |  |  |  |
| schedule d            |                                                                                                                                                                                                                                                                                                        |                                                                                                                                                                                                                                                                                                                                                                                                                                                                                                                                                                                                                                                                                                                                                                                                                                                                                                                                                                                                    |                                                                                                                                                                                                                                                                                                  |          |          |          |         |          |          |         |            |  |  |  |  |  |  |              |  |  |  |  |  |  |
| unschedu led          |                                                                                                                                                                                                                                                                                                        |                                                                                                                                                                                                                                                                                                                                                                                                                                                                                                                                                                                                                                                                                                                                                                                                                                                                                                                                                                                                    |                                                                                                                                                                                                                                                                                                  |          |          |          |         |          |          |         |            |  |  |  |  |  |  |              |  |  |  |  |  |  |
| AFFORDABILITY         |                                                                                                                                                                                                                                                                                                        |                                                                                                                                                                                                                                                                                                                                                                                                                                                                                                                                                                                                                                                                                                                                                                                                                                                                                                                                                                                                    |                                                                                                                                                                                                                                                                                                  |          |          |          |         |          |          |         |            |  |  |  |  |  |  |              |  |  |  |  |  |  |
| A. 11                 | Does your household have a meter for the primary source of electricity?                                                                                                                                                                                                                                | <input type="checkbox"/> 1. Yes<br><input type="checkbox"/> 2. No                                                                                                                                                                                                                                                                                                                                                                                                                                                                                                                                                                                                                                                                                                                                                                                                                                                                                                                                  |                                                                                                                                                                                                                                                                                                  |          |          |          |         |          |          |         |            |  |  |  |  |  |  |              |  |  |  |  |  |  |
| A. 12                 | In the last 3 months, how much did you spend for your primary source of electricity on average per month?                                                                                                                                                                                              | <div style="display: flex; align-items: center;"> <div style="border: 1px solid black; width: 30px; height: 30px; margin-right: 5px;"></div> <div style="border: 1px solid black; width: 30px; height: 30px; margin-right: 5px;"></div> <div style="border: 1px solid black; width: 30px; height: 30px; margin-right: 5px;"></div> <div style="border: 1px solid black; width: 30px; height: 30px; margin-right: 5px;"></div> <div>[Tk.]</div> </div>                                                                                                                                                                                                                                                                                                                                                                                                                                                                                                                                              |                                                                                                                                                                                                                                                                                                  |          |          |          |         |          |          |         |            |  |  |  |  |  |  |              |  |  |  |  |  |  |
| A. 13                 | What is the price you currently pay:                                                                                                                                                                                                                                                                   | <p><i>If Question A.01 is 1. Grid connection or 2. Local mini-grid</i></p> <div style="display: flex; align-items: center;"> <input type="checkbox"/> by Kwh           <div style="margin-left: 10px;"> <div style="border: 1px solid black; width: 30px; height: 30px; margin-right: 5px;"></div> <div style="border: 1px solid black; width: 30px; height: 30px; margin-right: 5px;"></div> <div style="border: 1px solid black; width: 30px; height: 30px; margin-right: 5px;"></div> <div>[Tk.]</div> </div> <div style="margin-left: 10px;"> </div> <div style="margin-left: 10px;"> <input type="checkbox"/> fixed charged           <div style="margin-left: 10px;"> <div style="border: 1px solid black; width: 30px; height: 30px; margin-right: 5px;"></div> <div style="border: 1px solid black; width: 30px; height: 30px; margin-right: 5px;"></div> <div style="border: 1px solid black; width: 30px; height: 30px; margin-right: 5px;"></div> <div>[Tk.]</div> </div> </div> </div> |                                                                                                                                                                                                                                                                                                  |          |          |          |         |          |          |         |            |  |  |  |  |  |  |              |  |  |  |  |  |  |

## Multi-tier Framework Questionnaire: Bangladesh

|                        |                                                                  |                                                                                                                                                                                                                                                                                                                                                                                                                                                                                                                                                                                                               |                                                                                                                                                                                                                                                            |
|------------------------|------------------------------------------------------------------|---------------------------------------------------------------------------------------------------------------------------------------------------------------------------------------------------------------------------------------------------------------------------------------------------------------------------------------------------------------------------------------------------------------------------------------------------------------------------------------------------------------------------------------------------------------------------------------------------------------|------------------------------------------------------------------------------------------------------------------------------------------------------------------------------------------------------------------------------------------------------------|
|                        |                                                                  | <p><i>If Question A.01 is 3. Fossil fuel based generator</i></p> <p> <input type="checkbox"/> by litre of fuel <span style="border: 1px solid black; padding: 2px 5px;">  </span><span style="border: 1px solid black; padding: 2px 5px;">  </span><span style="border: 1px solid black; padding: 2px 5px;">  </span> [Tk.]                <input type="checkbox"/> fixed charged <span style="border: 1px solid black; padding: 2px 5px;">  </span><span style="border: 1px solid black; padding: 2px 5px;">  </span><span style="border: 1px solid black; padding: 2px 5px;">  </span> [Tk.]           </p> |                                                                                                                                                                                                                                                            |
|                        |                                                                  | <p><i>If Question A.01 is 6. Rechargeable battery system</i></p> <p> <input type="checkbox"/> to recharge the battery one time <span style="border: 1px solid black; padding: 2px 5px;">  </span><span style="border: 1px solid black; padding: 2px 5px;">  </span><span style="border: 1px solid black; padding: 2px 5px;">  </span> [currency]           </p>                                                                                                                                                                                                                                               |                                                                                                                                                                                                                                                            |
|                        |                                                                  | <p><i>If Question A.01 is 4. Solar home system 5. Solar lantern</i></p> <p> <input type="checkbox"/> monthly instalment for the electricity supply equipment <span style="border: 1px solid black; padding: 2px 5px;">  </span><span style="border: 1px solid black; padding: 2px 5px;">  </span><span style="border: 1px solid black; padding: 2px 5px;">  </span> [Tk.]           </p>                                                                                                                                                                                                                      |                                                                                                                                                                                                                                                            |
| LEGALITY OF CONNECTION |                                                                  |                                                                                                                                                                                                                                                                                                                                                                                                                                                                                                                                                                                                               |                                                                                                                                                                                                                                                            |
| A. 14                  | Who do you currently pay for your primary source of electricity? | <input type="checkbox"/> 1. Local representative/official of the electricity company<br><input type="checkbox"/> 2. Pre-paid meter card seller<br><input type="checkbox"/> 3. Community /village/ municipality<br><input type="checkbox"/> 4. Relative<br><input type="checkbox"/> 5. Neighbour                                                                                                                                                                                                                                                                                                               | <input type="checkbox"/> 6. Land lord<br><input type="checkbox"/> 7. No one<br><input type="checkbox"/> 8. No need to pay –I have already paid for the equipment<br><input type="checkbox"/> 9. PO<br><input type="checkbox"/> 10. Others (specify): _____ |



## Multi-tier Framework Questionnaire: Bangladesh

| ADDITIONAL QUESTIONS |                                                                                                                                                  |                                                                                                                                                                                                                                                                                                                                                                                                                                     |
|----------------------|--------------------------------------------------------------------------------------------------------------------------------------------------|-------------------------------------------------------------------------------------------------------------------------------------------------------------------------------------------------------------------------------------------------------------------------------------------------------------------------------------------------------------------------------------------------------------------------------------|
| A.15                 | Overall, are you satisfied with the primary source of electricity in your household?                                                             | <input type="checkbox"/> 1. Yes<br><input type="checkbox"/> 2. No                                                                                                                                                                                                                                                                                                                                                                   |
| A.16                 | Does your primary source of electricity cover all your needs?                                                                                    | <input type="checkbox"/> 1. Yes → <b>B.01</b><br><input type="checkbox"/> 2. No                                                                                                                                                                                                                                                                                                                                                     |
| A.17                 | If not, which of the following aspects of the primary source of electricity would you like to improve?<br>[Rank according to priority from 1- 7] | <input type="checkbox"/> Longer supply hours<br><input type="checkbox"/> More appliances I can use<br><input type="checkbox"/> Lower cost<br><input type="checkbox"/> More flexible payment<br><input type="checkbox"/> Address low voltage issues and voltage fluctuations<br><input type="checkbox"/> Reducing number of unpredictable interruptions<br><input type="checkbox"/> Reducing duration of unpredictable interruptions |
| A.18                 | What do you use when you face problems with your electricity supply? (only if grid)                                                              | <input type="checkbox"/> 1. Invertors<br><input type="checkbox"/> 2. Voltage stabilizer<br><input type="checkbox"/> 3. Generators<br><input type="checkbox"/> 4. Battery and storage devices<br><input type="checkbox"/> 5. Others (specify): _____                                                                                                                                                                                 |
| A.19                 | Would you like to change your primary source of electricity?                                                                                     | <input type="checkbox"/> 1. Yes<br><input type="checkbox"/> 2. No                                                                                                                                                                                                                                                                                                                                                                   |
| A.20                 | If so, which source would be your main preference?                                                                                               | <input type="checkbox"/> 1. National grid connection<br><input type="checkbox"/> 2. Local mini-grid ( <b>Specify source</b> ) _____<br><input type="checkbox"/> 3. Fossil fuel based generator<br><input type="checkbox"/> 4. Solar home system<br><input type="checkbox"/> 5. Solar lantern<br><input type="checkbox"/> 6. Other: _____                                                                                            |

# Multi-tier Framework Questionnaire: Bangladesh

## MODULE B: ACCESS TO ELECTRICITY SERVICES

| B.1 | When do you most use these appliances? [Please mark with a cross, compare A03 for appliances in use]                                               | <table border="1"> <thead> <tr> <th></th><th>Appliance</th><th>Quantity</th><th>Hours of operation per day</th><th>6am-10am</th><th>10am-2pm</th><th>2pm-6pm</th><th>6pm-10pm</th><th>10pm -2am</th><th>2am-6am</th></tr> </thead> <tbody> <tr><td>A</td><td>Incandescent Light Bulbs</td><td></td><td></td><td></td><td></td><td></td><td></td><td></td><td></td></tr> <tr><td>B</td><td>Fluorescent Tube</td><td></td><td></td><td></td><td></td><td></td><td></td><td></td><td></td></tr> <tr><td>C</td><td>CFL</td><td></td><td></td><td></td><td></td><td></td><td></td><td></td><td></td></tr> <tr><td>D</td><td>LED</td><td></td><td></td><td></td><td></td><td></td><td></td><td></td><td></td></tr> <tr><td>E</td><td>Radio</td><td></td><td></td><td></td><td></td><td></td><td></td><td></td><td></td></tr> <tr><td>F</td><td>Phone charger</td><td></td><td></td><td></td><td></td><td></td><td></td><td></td><td></td></tr> <tr><td>G</td><td>Black and white TV</td><td></td><td></td><td></td><td></td><td></td><td></td><td></td><td></td></tr> <tr><td>H</td><td>Colour TV</td><td></td><td></td><td></td><td></td><td></td><td></td><td></td><td></td></tr> <tr><td>I</td><td>Electric Fan</td><td></td><td></td><td></td><td></td><td></td><td></td><td></td><td></td></tr> <tr><td>J</td><td>Computer</td><td></td><td></td><td></td><td></td><td></td><td></td><td></td><td></td></tr> <tr><td>K</td><td>Printer</td><td></td><td></td><td></td><td></td><td></td><td></td><td></td><td></td></tr> <tr><td>L</td><td>Air Cooler</td><td></td><td></td><td></td><td></td><td></td><td></td><td></td><td></td></tr> <tr><td>M</td><td>Electric Food Processor</td><td></td><td></td><td></td><td></td><td></td><td></td><td></td><td></td></tr> <tr><td>N</td><td>Rice Cooker</td><td></td><td></td><td></td><td></td><td></td><td></td><td></td><td></td></tr> <tr><td>O</td><td>Washing Machine</td><td></td><td></td><td></td><td></td><td></td><td></td><td></td><td></td></tr> <tr><td>P</td><td>Water Pump</td><td></td><td></td><td></td><td></td><td></td><td></td><td></td><td></td></tr> <tr><td>Q</td><td>Refrigerator</td><td></td><td></td><td></td><td></td><td></td><td></td><td></td><td></td></tr> <tr><td>R</td><td>Electric Iron</td><td></td><td></td><td></td><td></td><td></td><td></td><td></td><td></td></tr> <tr><td>S</td><td>Electric Hair Dryer</td><td></td><td></td><td></td><td></td><td></td><td></td><td></td><td></td></tr> <tr><td>T</td><td>Microwave Oven</td><td></td><td></td><td></td><td></td><td></td><td></td><td></td><td></td></tr> <tr><td>U</td><td>Electric Toaster</td><td></td><td></td><td></td><td></td><td></td><td></td><td></td><td></td></tr> <tr><td>V</td><td>Water Heater</td><td></td><td></td><td></td><td></td><td></td><td></td><td></td><td></td></tr> <tr><td>W</td><td>Air Conditioner</td><td></td><td></td><td></td><td></td><td></td><td></td><td></td><td></td></tr> <tr><td>X</td><td>Electric Space Heater</td><td></td><td></td><td></td><td></td><td></td><td></td><td></td><td></td></tr> <tr><td>Y</td><td>Electric cooking system</td><td></td><td></td><td></td><td></td><td></td><td></td><td></td><td></td></tr> <tr><td>Z.1</td><td>Dish Washer</td><td></td><td></td><td></td><td></td><td></td><td></td><td></td><td></td></tr> <tr><td>Z.2</td><td>OTHER</td><td></td><td></td><td></td><td></td><td></td><td></td><td></td><td></td></tr> <tr><td>Z.3</td><td>...</td><td></td><td></td><td></td><td></td><td></td><td></td><td></td><td></td></tr> </tbody> </table> |                            |          |          |         |          |           |         |  |           |   | Appliance                | Quantity | Hours of operation per day | 6am-10am | 10am-2pm | 2pm-6pm | 6pm-10pm | 10pm -2am | 2am-6am | A | Incandescent Light Bulbs |  |  |  |  |  |  |  |  | B | Fluorescent Tube |  |  |  |  |  |  |  |  | C | CFL |  |  |  |  |  |  |  |  | D | LED |  |  |  |  |  |  |  |  | E | Radio |  |  |  |  |  |  |  |  | F | Phone charger |  |  |  |  |  |  |  |  | G | Black and white TV |  |  |  |  |  |  |  |  | H | Colour TV |  |  |  |  |  |  |  |  | I | Electric Fan |  |  |  |  |  |  |  |  | J | Computer |  |  |  |  |  |  |  |  | K | Printer |  |  |  |  |  |  |  |  | L | Air Cooler |  |  |  |  |  |  |  |  | M | Electric Food Processor |  |  |  |  |  |  |  |  | N | Rice Cooker |  |  |  |  |  |  |  |  | O | Washing Machine |  |  |  |  |  |  |  |  | P | Water Pump |  |  |  |  |  |  |  |  | Q | Refrigerator |  |  |  |  |  |  |  |  | R | Electric Iron |  |  |  |  |  |  |  |  | S | Electric Hair Dryer |  |  |  |  |  |  |  |  | T | Microwave Oven |  |  |  |  |  |  |  |  | U | Electric Toaster |  |  |  |  |  |  |  |  | V | Water Heater |  |  |  |  |  |  |  |  | W | Air Conditioner |  |  |  |  |  |  |  |  | X | Electric Space Heater |  |  |  |  |  |  |  |  | Y | Electric cooking system |  |  |  |  |  |  |  |  | Z.1 | Dish Washer |  |  |  |  |  |  |  |  | Z.2 | OTHER |  |  |  |  |  |  |  |  | Z.3 | ... |  |  |  |  |  |  |  |  |
|-----|----------------------------------------------------------------------------------------------------------------------------------------------------|-------------------------------------------------------------------------------------------------------------------------------------------------------------------------------------------------------------------------------------------------------------------------------------------------------------------------------------------------------------------------------------------------------------------------------------------------------------------------------------------------------------------------------------------------------------------------------------------------------------------------------------------------------------------------------------------------------------------------------------------------------------------------------------------------------------------------------------------------------------------------------------------------------------------------------------------------------------------------------------------------------------------------------------------------------------------------------------------------------------------------------------------------------------------------------------------------------------------------------------------------------------------------------------------------------------------------------------------------------------------------------------------------------------------------------------------------------------------------------------------------------------------------------------------------------------------------------------------------------------------------------------------------------------------------------------------------------------------------------------------------------------------------------------------------------------------------------------------------------------------------------------------------------------------------------------------------------------------------------------------------------------------------------------------------------------------------------------------------------------------------------------------------------------------------------------------------------------------------------------------------------------------------------------------------------------------------------------------------------------------------------------------------------------------------------------------------------------------------------------------------------------------------------------------------------------------------------------------------------------------------------------------------------------------------------------------------------------------------------------------------------------------------------------------------------------------------------------------------------------------------------------------------------------------------------------------------------------------------------------------------------------------------------------------------------------------------------------------------------------------------------------------------------------------------------------------------------------------------------------------------------------------------------------------------------------------------------------------------------------------------------------------------------------------------------------------------------------------------------------------------------------------------------------------------------------------------------|----------------------------|----------|----------|---------|----------|-----------|---------|--|-----------|---|--------------------------|----------|----------------------------|----------|----------|---------|----------|-----------|---------|---|--------------------------|--|--|--|--|--|--|--|--|---|------------------|--|--|--|--|--|--|--|--|---|-----|--|--|--|--|--|--|--|--|---|-----|--|--|--|--|--|--|--|--|---|-------|--|--|--|--|--|--|--|--|---|---------------|--|--|--|--|--|--|--|--|---|--------------------|--|--|--|--|--|--|--|--|---|-----------|--|--|--|--|--|--|--|--|---|--------------|--|--|--|--|--|--|--|--|---|----------|--|--|--|--|--|--|--|--|---|---------|--|--|--|--|--|--|--|--|---|------------|--|--|--|--|--|--|--|--|---|-------------------------|--|--|--|--|--|--|--|--|---|-------------|--|--|--|--|--|--|--|--|---|-----------------|--|--|--|--|--|--|--|--|---|------------|--|--|--|--|--|--|--|--|---|--------------|--|--|--|--|--|--|--|--|---|---------------|--|--|--|--|--|--|--|--|---|---------------------|--|--|--|--|--|--|--|--|---|----------------|--|--|--|--|--|--|--|--|---|------------------|--|--|--|--|--|--|--|--|---|--------------|--|--|--|--|--|--|--|--|---|-----------------|--|--|--|--|--|--|--|--|---|-----------------------|--|--|--|--|--|--|--|--|---|-------------------------|--|--|--|--|--|--|--|--|-----|-------------|--|--|--|--|--|--|--|--|-----|-------|--|--|--|--|--|--|--|--|-----|-----|--|--|--|--|--|--|--|--|
|     | Appliance                                                                                                                                          | Quantity                                                                                                                                                                                                                                                                                                                                                                                                                                                                                                                                                                                                                                                                                                                                                                                                                                                                                                                                                                                                                                                                                                                                                                                                                                                                                                                                                                                                                                                                                                                                                                                                                                                                                                                                                                                                                                                                                                                                                                                                                                                                                                                                                                                                                                                                                                                                                                                                                                                                                                                                                                                                                                                                                                                                                                                                                                                                                                                                                                                                                                                                                                                                                                                                                                                                                                                                                                                                                                                                                                                                                                      | Hours of operation per day | 6am-10am | 10am-2pm | 2pm-6pm | 6pm-10pm | 10pm -2am | 2am-6am |  |           |   |                          |          |                            |          |          |         |          |           |         |   |                          |  |  |  |  |  |  |  |  |   |                  |  |  |  |  |  |  |  |  |   |     |  |  |  |  |  |  |  |  |   |     |  |  |  |  |  |  |  |  |   |       |  |  |  |  |  |  |  |  |   |               |  |  |  |  |  |  |  |  |   |                    |  |  |  |  |  |  |  |  |   |           |  |  |  |  |  |  |  |  |   |              |  |  |  |  |  |  |  |  |   |          |  |  |  |  |  |  |  |  |   |         |  |  |  |  |  |  |  |  |   |            |  |  |  |  |  |  |  |  |   |                         |  |  |  |  |  |  |  |  |   |             |  |  |  |  |  |  |  |  |   |                 |  |  |  |  |  |  |  |  |   |            |  |  |  |  |  |  |  |  |   |              |  |  |  |  |  |  |  |  |   |               |  |  |  |  |  |  |  |  |   |                     |  |  |  |  |  |  |  |  |   |                |  |  |  |  |  |  |  |  |   |                  |  |  |  |  |  |  |  |  |   |              |  |  |  |  |  |  |  |  |   |                 |  |  |  |  |  |  |  |  |   |                       |  |  |  |  |  |  |  |  |   |                         |  |  |  |  |  |  |  |  |     |             |  |  |  |  |  |  |  |  |     |       |  |  |  |  |  |  |  |  |     |     |  |  |  |  |  |  |  |  |
| A   | Incandescent Light Bulbs                                                                                                                           |                                                                                                                                                                                                                                                                                                                                                                                                                                                                                                                                                                                                                                                                                                                                                                                                                                                                                                                                                                                                                                                                                                                                                                                                                                                                                                                                                                                                                                                                                                                                                                                                                                                                                                                                                                                                                                                                                                                                                                                                                                                                                                                                                                                                                                                                                                                                                                                                                                                                                                                                                                                                                                                                                                                                                                                                                                                                                                                                                                                                                                                                                                                                                                                                                                                                                                                                                                                                                                                                                                                                                                               |                            |          |          |         |          |           |         |  |           |   |                          |          |                            |          |          |         |          |           |         |   |                          |  |  |  |  |  |  |  |  |   |                  |  |  |  |  |  |  |  |  |   |     |  |  |  |  |  |  |  |  |   |     |  |  |  |  |  |  |  |  |   |       |  |  |  |  |  |  |  |  |   |               |  |  |  |  |  |  |  |  |   |                    |  |  |  |  |  |  |  |  |   |           |  |  |  |  |  |  |  |  |   |              |  |  |  |  |  |  |  |  |   |          |  |  |  |  |  |  |  |  |   |         |  |  |  |  |  |  |  |  |   |            |  |  |  |  |  |  |  |  |   |                         |  |  |  |  |  |  |  |  |   |             |  |  |  |  |  |  |  |  |   |                 |  |  |  |  |  |  |  |  |   |            |  |  |  |  |  |  |  |  |   |              |  |  |  |  |  |  |  |  |   |               |  |  |  |  |  |  |  |  |   |                     |  |  |  |  |  |  |  |  |   |                |  |  |  |  |  |  |  |  |   |                  |  |  |  |  |  |  |  |  |   |              |  |  |  |  |  |  |  |  |   |                 |  |  |  |  |  |  |  |  |   |                       |  |  |  |  |  |  |  |  |   |                         |  |  |  |  |  |  |  |  |     |             |  |  |  |  |  |  |  |  |     |       |  |  |  |  |  |  |  |  |     |     |  |  |  |  |  |  |  |  |
| B   | Fluorescent Tube                                                                                                                                   |                                                                                                                                                                                                                                                                                                                                                                                                                                                                                                                                                                                                                                                                                                                                                                                                                                                                                                                                                                                                                                                                                                                                                                                                                                                                                                                                                                                                                                                                                                                                                                                                                                                                                                                                                                                                                                                                                                                                                                                                                                                                                                                                                                                                                                                                                                                                                                                                                                                                                                                                                                                                                                                                                                                                                                                                                                                                                                                                                                                                                                                                                                                                                                                                                                                                                                                                                                                                                                                                                                                                                                               |                            |          |          |         |          |           |         |  |           |   |                          |          |                            |          |          |         |          |           |         |   |                          |  |  |  |  |  |  |  |  |   |                  |  |  |  |  |  |  |  |  |   |     |  |  |  |  |  |  |  |  |   |     |  |  |  |  |  |  |  |  |   |       |  |  |  |  |  |  |  |  |   |               |  |  |  |  |  |  |  |  |   |                    |  |  |  |  |  |  |  |  |   |           |  |  |  |  |  |  |  |  |   |              |  |  |  |  |  |  |  |  |   |          |  |  |  |  |  |  |  |  |   |         |  |  |  |  |  |  |  |  |   |            |  |  |  |  |  |  |  |  |   |                         |  |  |  |  |  |  |  |  |   |             |  |  |  |  |  |  |  |  |   |                 |  |  |  |  |  |  |  |  |   |            |  |  |  |  |  |  |  |  |   |              |  |  |  |  |  |  |  |  |   |               |  |  |  |  |  |  |  |  |   |                     |  |  |  |  |  |  |  |  |   |                |  |  |  |  |  |  |  |  |   |                  |  |  |  |  |  |  |  |  |   |              |  |  |  |  |  |  |  |  |   |                 |  |  |  |  |  |  |  |  |   |                       |  |  |  |  |  |  |  |  |   |                         |  |  |  |  |  |  |  |  |     |             |  |  |  |  |  |  |  |  |     |       |  |  |  |  |  |  |  |  |     |     |  |  |  |  |  |  |  |  |
| C   | CFL                                                                                                                                                |                                                                                                                                                                                                                                                                                                                                                                                                                                                                                                                                                                                                                                                                                                                                                                                                                                                                                                                                                                                                                                                                                                                                                                                                                                                                                                                                                                                                                                                                                                                                                                                                                                                                                                                                                                                                                                                                                                                                                                                                                                                                                                                                                                                                                                                                                                                                                                                                                                                                                                                                                                                                                                                                                                                                                                                                                                                                                                                                                                                                                                                                                                                                                                                                                                                                                                                                                                                                                                                                                                                                                                               |                            |          |          |         |          |           |         |  |           |   |                          |          |                            |          |          |         |          |           |         |   |                          |  |  |  |  |  |  |  |  |   |                  |  |  |  |  |  |  |  |  |   |     |  |  |  |  |  |  |  |  |   |     |  |  |  |  |  |  |  |  |   |       |  |  |  |  |  |  |  |  |   |               |  |  |  |  |  |  |  |  |   |                    |  |  |  |  |  |  |  |  |   |           |  |  |  |  |  |  |  |  |   |              |  |  |  |  |  |  |  |  |   |          |  |  |  |  |  |  |  |  |   |         |  |  |  |  |  |  |  |  |   |            |  |  |  |  |  |  |  |  |   |                         |  |  |  |  |  |  |  |  |   |             |  |  |  |  |  |  |  |  |   |                 |  |  |  |  |  |  |  |  |   |            |  |  |  |  |  |  |  |  |   |              |  |  |  |  |  |  |  |  |   |               |  |  |  |  |  |  |  |  |   |                     |  |  |  |  |  |  |  |  |   |                |  |  |  |  |  |  |  |  |   |                  |  |  |  |  |  |  |  |  |   |              |  |  |  |  |  |  |  |  |   |                 |  |  |  |  |  |  |  |  |   |                       |  |  |  |  |  |  |  |  |   |                         |  |  |  |  |  |  |  |  |     |             |  |  |  |  |  |  |  |  |     |       |  |  |  |  |  |  |  |  |     |     |  |  |  |  |  |  |  |  |
| D   | LED                                                                                                                                                |                                                                                                                                                                                                                                                                                                                                                                                                                                                                                                                                                                                                                                                                                                                                                                                                                                                                                                                                                                                                                                                                                                                                                                                                                                                                                                                                                                                                                                                                                                                                                                                                                                                                                                                                                                                                                                                                                                                                                                                                                                                                                                                                                                                                                                                                                                                                                                                                                                                                                                                                                                                                                                                                                                                                                                                                                                                                                                                                                                                                                                                                                                                                                                                                                                                                                                                                                                                                                                                                                                                                                                               |                            |          |          |         |          |           |         |  |           |   |                          |          |                            |          |          |         |          |           |         |   |                          |  |  |  |  |  |  |  |  |   |                  |  |  |  |  |  |  |  |  |   |     |  |  |  |  |  |  |  |  |   |     |  |  |  |  |  |  |  |  |   |       |  |  |  |  |  |  |  |  |   |               |  |  |  |  |  |  |  |  |   |                    |  |  |  |  |  |  |  |  |   |           |  |  |  |  |  |  |  |  |   |              |  |  |  |  |  |  |  |  |   |          |  |  |  |  |  |  |  |  |   |         |  |  |  |  |  |  |  |  |   |            |  |  |  |  |  |  |  |  |   |                         |  |  |  |  |  |  |  |  |   |             |  |  |  |  |  |  |  |  |   |                 |  |  |  |  |  |  |  |  |   |            |  |  |  |  |  |  |  |  |   |              |  |  |  |  |  |  |  |  |   |               |  |  |  |  |  |  |  |  |   |                     |  |  |  |  |  |  |  |  |   |                |  |  |  |  |  |  |  |  |   |                  |  |  |  |  |  |  |  |  |   |              |  |  |  |  |  |  |  |  |   |                 |  |  |  |  |  |  |  |  |   |                       |  |  |  |  |  |  |  |  |   |                         |  |  |  |  |  |  |  |  |     |             |  |  |  |  |  |  |  |  |     |       |  |  |  |  |  |  |  |  |     |     |  |  |  |  |  |  |  |  |
| E   | Radio                                                                                                                                              |                                                                                                                                                                                                                                                                                                                                                                                                                                                                                                                                                                                                                                                                                                                                                                                                                                                                                                                                                                                                                                                                                                                                                                                                                                                                                                                                                                                                                                                                                                                                                                                                                                                                                                                                                                                                                                                                                                                                                                                                                                                                                                                                                                                                                                                                                                                                                                                                                                                                                                                                                                                                                                                                                                                                                                                                                                                                                                                                                                                                                                                                                                                                                                                                                                                                                                                                                                                                                                                                                                                                                                               |                            |          |          |         |          |           |         |  |           |   |                          |          |                            |          |          |         |          |           |         |   |                          |  |  |  |  |  |  |  |  |   |                  |  |  |  |  |  |  |  |  |   |     |  |  |  |  |  |  |  |  |   |     |  |  |  |  |  |  |  |  |   |       |  |  |  |  |  |  |  |  |   |               |  |  |  |  |  |  |  |  |   |                    |  |  |  |  |  |  |  |  |   |           |  |  |  |  |  |  |  |  |   |              |  |  |  |  |  |  |  |  |   |          |  |  |  |  |  |  |  |  |   |         |  |  |  |  |  |  |  |  |   |            |  |  |  |  |  |  |  |  |   |                         |  |  |  |  |  |  |  |  |   |             |  |  |  |  |  |  |  |  |   |                 |  |  |  |  |  |  |  |  |   |            |  |  |  |  |  |  |  |  |   |              |  |  |  |  |  |  |  |  |   |               |  |  |  |  |  |  |  |  |   |                     |  |  |  |  |  |  |  |  |   |                |  |  |  |  |  |  |  |  |   |                  |  |  |  |  |  |  |  |  |   |              |  |  |  |  |  |  |  |  |   |                 |  |  |  |  |  |  |  |  |   |                       |  |  |  |  |  |  |  |  |   |                         |  |  |  |  |  |  |  |  |     |             |  |  |  |  |  |  |  |  |     |       |  |  |  |  |  |  |  |  |     |     |  |  |  |  |  |  |  |  |
| F   | Phone charger                                                                                                                                      |                                                                                                                                                                                                                                                                                                                                                                                                                                                                                                                                                                                                                                                                                                                                                                                                                                                                                                                                                                                                                                                                                                                                                                                                                                                                                                                                                                                                                                                                                                                                                                                                                                                                                                                                                                                                                                                                                                                                                                                                                                                                                                                                                                                                                                                                                                                                                                                                                                                                                                                                                                                                                                                                                                                                                                                                                                                                                                                                                                                                                                                                                                                                                                                                                                                                                                                                                                                                                                                                                                                                                                               |                            |          |          |         |          |           |         |  |           |   |                          |          |                            |          |          |         |          |           |         |   |                          |  |  |  |  |  |  |  |  |   |                  |  |  |  |  |  |  |  |  |   |     |  |  |  |  |  |  |  |  |   |     |  |  |  |  |  |  |  |  |   |       |  |  |  |  |  |  |  |  |   |               |  |  |  |  |  |  |  |  |   |                    |  |  |  |  |  |  |  |  |   |           |  |  |  |  |  |  |  |  |   |              |  |  |  |  |  |  |  |  |   |          |  |  |  |  |  |  |  |  |   |         |  |  |  |  |  |  |  |  |   |            |  |  |  |  |  |  |  |  |   |                         |  |  |  |  |  |  |  |  |   |             |  |  |  |  |  |  |  |  |   |                 |  |  |  |  |  |  |  |  |   |            |  |  |  |  |  |  |  |  |   |              |  |  |  |  |  |  |  |  |   |               |  |  |  |  |  |  |  |  |   |                     |  |  |  |  |  |  |  |  |   |                |  |  |  |  |  |  |  |  |   |                  |  |  |  |  |  |  |  |  |   |              |  |  |  |  |  |  |  |  |   |                 |  |  |  |  |  |  |  |  |   |                       |  |  |  |  |  |  |  |  |   |                         |  |  |  |  |  |  |  |  |     |             |  |  |  |  |  |  |  |  |     |       |  |  |  |  |  |  |  |  |     |     |  |  |  |  |  |  |  |  |
| G   | Black and white TV                                                                                                                                 |                                                                                                                                                                                                                                                                                                                                                                                                                                                                                                                                                                                                                                                                                                                                                                                                                                                                                                                                                                                                                                                                                                                                                                                                                                                                                                                                                                                                                                                                                                                                                                                                                                                                                                                                                                                                                                                                                                                                                                                                                                                                                                                                                                                                                                                                                                                                                                                                                                                                                                                                                                                                                                                                                                                                                                                                                                                                                                                                                                                                                                                                                                                                                                                                                                                                                                                                                                                                                                                                                                                                                                               |                            |          |          |         |          |           |         |  |           |   |                          |          |                            |          |          |         |          |           |         |   |                          |  |  |  |  |  |  |  |  |   |                  |  |  |  |  |  |  |  |  |   |     |  |  |  |  |  |  |  |  |   |     |  |  |  |  |  |  |  |  |   |       |  |  |  |  |  |  |  |  |   |               |  |  |  |  |  |  |  |  |   |                    |  |  |  |  |  |  |  |  |   |           |  |  |  |  |  |  |  |  |   |              |  |  |  |  |  |  |  |  |   |          |  |  |  |  |  |  |  |  |   |         |  |  |  |  |  |  |  |  |   |            |  |  |  |  |  |  |  |  |   |                         |  |  |  |  |  |  |  |  |   |             |  |  |  |  |  |  |  |  |   |                 |  |  |  |  |  |  |  |  |   |            |  |  |  |  |  |  |  |  |   |              |  |  |  |  |  |  |  |  |   |               |  |  |  |  |  |  |  |  |   |                     |  |  |  |  |  |  |  |  |   |                |  |  |  |  |  |  |  |  |   |                  |  |  |  |  |  |  |  |  |   |              |  |  |  |  |  |  |  |  |   |                 |  |  |  |  |  |  |  |  |   |                       |  |  |  |  |  |  |  |  |   |                         |  |  |  |  |  |  |  |  |     |             |  |  |  |  |  |  |  |  |     |       |  |  |  |  |  |  |  |  |     |     |  |  |  |  |  |  |  |  |
| H   | Colour TV                                                                                                                                          |                                                                                                                                                                                                                                                                                                                                                                                                                                                                                                                                                                                                                                                                                                                                                                                                                                                                                                                                                                                                                                                                                                                                                                                                                                                                                                                                                                                                                                                                                                                                                                                                                                                                                                                                                                                                                                                                                                                                                                                                                                                                                                                                                                                                                                                                                                                                                                                                                                                                                                                                                                                                                                                                                                                                                                                                                                                                                                                                                                                                                                                                                                                                                                                                                                                                                                                                                                                                                                                                                                                                                                               |                            |          |          |         |          |           |         |  |           |   |                          |          |                            |          |          |         |          |           |         |   |                          |  |  |  |  |  |  |  |  |   |                  |  |  |  |  |  |  |  |  |   |     |  |  |  |  |  |  |  |  |   |     |  |  |  |  |  |  |  |  |   |       |  |  |  |  |  |  |  |  |   |               |  |  |  |  |  |  |  |  |   |                    |  |  |  |  |  |  |  |  |   |           |  |  |  |  |  |  |  |  |   |              |  |  |  |  |  |  |  |  |   |          |  |  |  |  |  |  |  |  |   |         |  |  |  |  |  |  |  |  |   |            |  |  |  |  |  |  |  |  |   |                         |  |  |  |  |  |  |  |  |   |             |  |  |  |  |  |  |  |  |   |                 |  |  |  |  |  |  |  |  |   |            |  |  |  |  |  |  |  |  |   |              |  |  |  |  |  |  |  |  |   |               |  |  |  |  |  |  |  |  |   |                     |  |  |  |  |  |  |  |  |   |                |  |  |  |  |  |  |  |  |   |                  |  |  |  |  |  |  |  |  |   |              |  |  |  |  |  |  |  |  |   |                 |  |  |  |  |  |  |  |  |   |                       |  |  |  |  |  |  |  |  |   |                         |  |  |  |  |  |  |  |  |     |             |  |  |  |  |  |  |  |  |     |       |  |  |  |  |  |  |  |  |     |     |  |  |  |  |  |  |  |  |
| I   | Electric Fan                                                                                                                                       |                                                                                                                                                                                                                                                                                                                                                                                                                                                                                                                                                                                                                                                                                                                                                                                                                                                                                                                                                                                                                                                                                                                                                                                                                                                                                                                                                                                                                                                                                                                                                                                                                                                                                                                                                                                                                                                                                                                                                                                                                                                                                                                                                                                                                                                                                                                                                                                                                                                                                                                                                                                                                                                                                                                                                                                                                                                                                                                                                                                                                                                                                                                                                                                                                                                                                                                                                                                                                                                                                                                                                                               |                            |          |          |         |          |           |         |  |           |   |                          |          |                            |          |          |         |          |           |         |   |                          |  |  |  |  |  |  |  |  |   |                  |  |  |  |  |  |  |  |  |   |     |  |  |  |  |  |  |  |  |   |     |  |  |  |  |  |  |  |  |   |       |  |  |  |  |  |  |  |  |   |               |  |  |  |  |  |  |  |  |   |                    |  |  |  |  |  |  |  |  |   |           |  |  |  |  |  |  |  |  |   |              |  |  |  |  |  |  |  |  |   |          |  |  |  |  |  |  |  |  |   |         |  |  |  |  |  |  |  |  |   |            |  |  |  |  |  |  |  |  |   |                         |  |  |  |  |  |  |  |  |   |             |  |  |  |  |  |  |  |  |   |                 |  |  |  |  |  |  |  |  |   |            |  |  |  |  |  |  |  |  |   |              |  |  |  |  |  |  |  |  |   |               |  |  |  |  |  |  |  |  |   |                     |  |  |  |  |  |  |  |  |   |                |  |  |  |  |  |  |  |  |   |                  |  |  |  |  |  |  |  |  |   |              |  |  |  |  |  |  |  |  |   |                 |  |  |  |  |  |  |  |  |   |                       |  |  |  |  |  |  |  |  |   |                         |  |  |  |  |  |  |  |  |     |             |  |  |  |  |  |  |  |  |     |       |  |  |  |  |  |  |  |  |     |     |  |  |  |  |  |  |  |  |
| J   | Computer                                                                                                                                           |                                                                                                                                                                                                                                                                                                                                                                                                                                                                                                                                                                                                                                                                                                                                                                                                                                                                                                                                                                                                                                                                                                                                                                                                                                                                                                                                                                                                                                                                                                                                                                                                                                                                                                                                                                                                                                                                                                                                                                                                                                                                                                                                                                                                                                                                                                                                                                                                                                                                                                                                                                                                                                                                                                                                                                                                                                                                                                                                                                                                                                                                                                                                                                                                                                                                                                                                                                                                                                                                                                                                                                               |                            |          |          |         |          |           |         |  |           |   |                          |          |                            |          |          |         |          |           |         |   |                          |  |  |  |  |  |  |  |  |   |                  |  |  |  |  |  |  |  |  |   |     |  |  |  |  |  |  |  |  |   |     |  |  |  |  |  |  |  |  |   |       |  |  |  |  |  |  |  |  |   |               |  |  |  |  |  |  |  |  |   |                    |  |  |  |  |  |  |  |  |   |           |  |  |  |  |  |  |  |  |   |              |  |  |  |  |  |  |  |  |   |          |  |  |  |  |  |  |  |  |   |         |  |  |  |  |  |  |  |  |   |            |  |  |  |  |  |  |  |  |   |                         |  |  |  |  |  |  |  |  |   |             |  |  |  |  |  |  |  |  |   |                 |  |  |  |  |  |  |  |  |   |            |  |  |  |  |  |  |  |  |   |              |  |  |  |  |  |  |  |  |   |               |  |  |  |  |  |  |  |  |   |                     |  |  |  |  |  |  |  |  |   |                |  |  |  |  |  |  |  |  |   |                  |  |  |  |  |  |  |  |  |   |              |  |  |  |  |  |  |  |  |   |                 |  |  |  |  |  |  |  |  |   |                       |  |  |  |  |  |  |  |  |   |                         |  |  |  |  |  |  |  |  |     |             |  |  |  |  |  |  |  |  |     |       |  |  |  |  |  |  |  |  |     |     |  |  |  |  |  |  |  |  |
| K   | Printer                                                                                                                                            |                                                                                                                                                                                                                                                                                                                                                                                                                                                                                                                                                                                                                                                                                                                                                                                                                                                                                                                                                                                                                                                                                                                                                                                                                                                                                                                                                                                                                                                                                                                                                                                                                                                                                                                                                                                                                                                                                                                                                                                                                                                                                                                                                                                                                                                                                                                                                                                                                                                                                                                                                                                                                                                                                                                                                                                                                                                                                                                                                                                                                                                                                                                                                                                                                                                                                                                                                                                                                                                                                                                                                                               |                            |          |          |         |          |           |         |  |           |   |                          |          |                            |          |          |         |          |           |         |   |                          |  |  |  |  |  |  |  |  |   |                  |  |  |  |  |  |  |  |  |   |     |  |  |  |  |  |  |  |  |   |     |  |  |  |  |  |  |  |  |   |       |  |  |  |  |  |  |  |  |   |               |  |  |  |  |  |  |  |  |   |                    |  |  |  |  |  |  |  |  |   |           |  |  |  |  |  |  |  |  |   |              |  |  |  |  |  |  |  |  |   |          |  |  |  |  |  |  |  |  |   |         |  |  |  |  |  |  |  |  |   |            |  |  |  |  |  |  |  |  |   |                         |  |  |  |  |  |  |  |  |   |             |  |  |  |  |  |  |  |  |   |                 |  |  |  |  |  |  |  |  |   |            |  |  |  |  |  |  |  |  |   |              |  |  |  |  |  |  |  |  |   |               |  |  |  |  |  |  |  |  |   |                     |  |  |  |  |  |  |  |  |   |                |  |  |  |  |  |  |  |  |   |                  |  |  |  |  |  |  |  |  |   |              |  |  |  |  |  |  |  |  |   |                 |  |  |  |  |  |  |  |  |   |                       |  |  |  |  |  |  |  |  |   |                         |  |  |  |  |  |  |  |  |     |             |  |  |  |  |  |  |  |  |     |       |  |  |  |  |  |  |  |  |     |     |  |  |  |  |  |  |  |  |
| L   | Air Cooler                                                                                                                                         |                                                                                                                                                                                                                                                                                                                                                                                                                                                                                                                                                                                                                                                                                                                                                                                                                                                                                                                                                                                                                                                                                                                                                                                                                                                                                                                                                                                                                                                                                                                                                                                                                                                                                                                                                                                                                                                                                                                                                                                                                                                                                                                                                                                                                                                                                                                                                                                                                                                                                                                                                                                                                                                                                                                                                                                                                                                                                                                                                                                                                                                                                                                                                                                                                                                                                                                                                                                                                                                                                                                                                                               |                            |          |          |         |          |           |         |  |           |   |                          |          |                            |          |          |         |          |           |         |   |                          |  |  |  |  |  |  |  |  |   |                  |  |  |  |  |  |  |  |  |   |     |  |  |  |  |  |  |  |  |   |     |  |  |  |  |  |  |  |  |   |       |  |  |  |  |  |  |  |  |   |               |  |  |  |  |  |  |  |  |   |                    |  |  |  |  |  |  |  |  |   |           |  |  |  |  |  |  |  |  |   |              |  |  |  |  |  |  |  |  |   |          |  |  |  |  |  |  |  |  |   |         |  |  |  |  |  |  |  |  |   |            |  |  |  |  |  |  |  |  |   |                         |  |  |  |  |  |  |  |  |   |             |  |  |  |  |  |  |  |  |   |                 |  |  |  |  |  |  |  |  |   |            |  |  |  |  |  |  |  |  |   |              |  |  |  |  |  |  |  |  |   |               |  |  |  |  |  |  |  |  |   |                     |  |  |  |  |  |  |  |  |   |                |  |  |  |  |  |  |  |  |   |                  |  |  |  |  |  |  |  |  |   |              |  |  |  |  |  |  |  |  |   |                 |  |  |  |  |  |  |  |  |   |                       |  |  |  |  |  |  |  |  |   |                         |  |  |  |  |  |  |  |  |     |             |  |  |  |  |  |  |  |  |     |       |  |  |  |  |  |  |  |  |     |     |  |  |  |  |  |  |  |  |
| M   | Electric Food Processor                                                                                                                            |                                                                                                                                                                                                                                                                                                                                                                                                                                                                                                                                                                                                                                                                                                                                                                                                                                                                                                                                                                                                                                                                                                                                                                                                                                                                                                                                                                                                                                                                                                                                                                                                                                                                                                                                                                                                                                                                                                                                                                                                                                                                                                                                                                                                                                                                                                                                                                                                                                                                                                                                                                                                                                                                                                                                                                                                                                                                                                                                                                                                                                                                                                                                                                                                                                                                                                                                                                                                                                                                                                                                                                               |                            |          |          |         |          |           |         |  |           |   |                          |          |                            |          |          |         |          |           |         |   |                          |  |  |  |  |  |  |  |  |   |                  |  |  |  |  |  |  |  |  |   |     |  |  |  |  |  |  |  |  |   |     |  |  |  |  |  |  |  |  |   |       |  |  |  |  |  |  |  |  |   |               |  |  |  |  |  |  |  |  |   |                    |  |  |  |  |  |  |  |  |   |           |  |  |  |  |  |  |  |  |   |              |  |  |  |  |  |  |  |  |   |          |  |  |  |  |  |  |  |  |   |         |  |  |  |  |  |  |  |  |   |            |  |  |  |  |  |  |  |  |   |                         |  |  |  |  |  |  |  |  |   |             |  |  |  |  |  |  |  |  |   |                 |  |  |  |  |  |  |  |  |   |            |  |  |  |  |  |  |  |  |   |              |  |  |  |  |  |  |  |  |   |               |  |  |  |  |  |  |  |  |   |                     |  |  |  |  |  |  |  |  |   |                |  |  |  |  |  |  |  |  |   |                  |  |  |  |  |  |  |  |  |   |              |  |  |  |  |  |  |  |  |   |                 |  |  |  |  |  |  |  |  |   |                       |  |  |  |  |  |  |  |  |   |                         |  |  |  |  |  |  |  |  |     |             |  |  |  |  |  |  |  |  |     |       |  |  |  |  |  |  |  |  |     |     |  |  |  |  |  |  |  |  |
| N   | Rice Cooker                                                                                                                                        |                                                                                                                                                                                                                                                                                                                                                                                                                                                                                                                                                                                                                                                                                                                                                                                                                                                                                                                                                                                                                                                                                                                                                                                                                                                                                                                                                                                                                                                                                                                                                                                                                                                                                                                                                                                                                                                                                                                                                                                                                                                                                                                                                                                                                                                                                                                                                                                                                                                                                                                                                                                                                                                                                                                                                                                                                                                                                                                                                                                                                                                                                                                                                                                                                                                                                                                                                                                                                                                                                                                                                                               |                            |          |          |         |          |           |         |  |           |   |                          |          |                            |          |          |         |          |           |         |   |                          |  |  |  |  |  |  |  |  |   |                  |  |  |  |  |  |  |  |  |   |     |  |  |  |  |  |  |  |  |   |     |  |  |  |  |  |  |  |  |   |       |  |  |  |  |  |  |  |  |   |               |  |  |  |  |  |  |  |  |   |                    |  |  |  |  |  |  |  |  |   |           |  |  |  |  |  |  |  |  |   |              |  |  |  |  |  |  |  |  |   |          |  |  |  |  |  |  |  |  |   |         |  |  |  |  |  |  |  |  |   |            |  |  |  |  |  |  |  |  |   |                         |  |  |  |  |  |  |  |  |   |             |  |  |  |  |  |  |  |  |   |                 |  |  |  |  |  |  |  |  |   |            |  |  |  |  |  |  |  |  |   |              |  |  |  |  |  |  |  |  |   |               |  |  |  |  |  |  |  |  |   |                     |  |  |  |  |  |  |  |  |   |                |  |  |  |  |  |  |  |  |   |                  |  |  |  |  |  |  |  |  |   |              |  |  |  |  |  |  |  |  |   |                 |  |  |  |  |  |  |  |  |   |                       |  |  |  |  |  |  |  |  |   |                         |  |  |  |  |  |  |  |  |     |             |  |  |  |  |  |  |  |  |     |       |  |  |  |  |  |  |  |  |     |     |  |  |  |  |  |  |  |  |
| O   | Washing Machine                                                                                                                                    |                                                                                                                                                                                                                                                                                                                                                                                                                                                                                                                                                                                                                                                                                                                                                                                                                                                                                                                                                                                                                                                                                                                                                                                                                                                                                                                                                                                                                                                                                                                                                                                                                                                                                                                                                                                                                                                                                                                                                                                                                                                                                                                                                                                                                                                                                                                                                                                                                                                                                                                                                                                                                                                                                                                                                                                                                                                                                                                                                                                                                                                                                                                                                                                                                                                                                                                                                                                                                                                                                                                                                                               |                            |          |          |         |          |           |         |  |           |   |                          |          |                            |          |          |         |          |           |         |   |                          |  |  |  |  |  |  |  |  |   |                  |  |  |  |  |  |  |  |  |   |     |  |  |  |  |  |  |  |  |   |     |  |  |  |  |  |  |  |  |   |       |  |  |  |  |  |  |  |  |   |               |  |  |  |  |  |  |  |  |   |                    |  |  |  |  |  |  |  |  |   |           |  |  |  |  |  |  |  |  |   |              |  |  |  |  |  |  |  |  |   |          |  |  |  |  |  |  |  |  |   |         |  |  |  |  |  |  |  |  |   |            |  |  |  |  |  |  |  |  |   |                         |  |  |  |  |  |  |  |  |   |             |  |  |  |  |  |  |  |  |   |                 |  |  |  |  |  |  |  |  |   |            |  |  |  |  |  |  |  |  |   |              |  |  |  |  |  |  |  |  |   |               |  |  |  |  |  |  |  |  |   |                     |  |  |  |  |  |  |  |  |   |                |  |  |  |  |  |  |  |  |   |                  |  |  |  |  |  |  |  |  |   |              |  |  |  |  |  |  |  |  |   |                 |  |  |  |  |  |  |  |  |   |                       |  |  |  |  |  |  |  |  |   |                         |  |  |  |  |  |  |  |  |     |             |  |  |  |  |  |  |  |  |     |       |  |  |  |  |  |  |  |  |     |     |  |  |  |  |  |  |  |  |
| P   | Water Pump                                                                                                                                         |                                                                                                                                                                                                                                                                                                                                                                                                                                                                                                                                                                                                                                                                                                                                                                                                                                                                                                                                                                                                                                                                                                                                                                                                                                                                                                                                                                                                                                                                                                                                                                                                                                                                                                                                                                                                                                                                                                                                                                                                                                                                                                                                                                                                                                                                                                                                                                                                                                                                                                                                                                                                                                                                                                                                                                                                                                                                                                                                                                                                                                                                                                                                                                                                                                                                                                                                                                                                                                                                                                                                                                               |                            |          |          |         |          |           |         |  |           |   |                          |          |                            |          |          |         |          |           |         |   |                          |  |  |  |  |  |  |  |  |   |                  |  |  |  |  |  |  |  |  |   |     |  |  |  |  |  |  |  |  |   |     |  |  |  |  |  |  |  |  |   |       |  |  |  |  |  |  |  |  |   |               |  |  |  |  |  |  |  |  |   |                    |  |  |  |  |  |  |  |  |   |           |  |  |  |  |  |  |  |  |   |              |  |  |  |  |  |  |  |  |   |          |  |  |  |  |  |  |  |  |   |         |  |  |  |  |  |  |  |  |   |            |  |  |  |  |  |  |  |  |   |                         |  |  |  |  |  |  |  |  |   |             |  |  |  |  |  |  |  |  |   |                 |  |  |  |  |  |  |  |  |   |            |  |  |  |  |  |  |  |  |   |              |  |  |  |  |  |  |  |  |   |               |  |  |  |  |  |  |  |  |   |                     |  |  |  |  |  |  |  |  |   |                |  |  |  |  |  |  |  |  |   |                  |  |  |  |  |  |  |  |  |   |              |  |  |  |  |  |  |  |  |   |                 |  |  |  |  |  |  |  |  |   |                       |  |  |  |  |  |  |  |  |   |                         |  |  |  |  |  |  |  |  |     |             |  |  |  |  |  |  |  |  |     |       |  |  |  |  |  |  |  |  |     |     |  |  |  |  |  |  |  |  |
| Q   | Refrigerator                                                                                                                                       |                                                                                                                                                                                                                                                                                                                                                                                                                                                                                                                                                                                                                                                                                                                                                                                                                                                                                                                                                                                                                                                                                                                                                                                                                                                                                                                                                                                                                                                                                                                                                                                                                                                                                                                                                                                                                                                                                                                                                                                                                                                                                                                                                                                                                                                                                                                                                                                                                                                                                                                                                                                                                                                                                                                                                                                                                                                                                                                                                                                                                                                                                                                                                                                                                                                                                                                                                                                                                                                                                                                                                                               |                            |          |          |         |          |           |         |  |           |   |                          |          |                            |          |          |         |          |           |         |   |                          |  |  |  |  |  |  |  |  |   |                  |  |  |  |  |  |  |  |  |   |     |  |  |  |  |  |  |  |  |   |     |  |  |  |  |  |  |  |  |   |       |  |  |  |  |  |  |  |  |   |               |  |  |  |  |  |  |  |  |   |                    |  |  |  |  |  |  |  |  |   |           |  |  |  |  |  |  |  |  |   |              |  |  |  |  |  |  |  |  |   |          |  |  |  |  |  |  |  |  |   |         |  |  |  |  |  |  |  |  |   |            |  |  |  |  |  |  |  |  |   |                         |  |  |  |  |  |  |  |  |   |             |  |  |  |  |  |  |  |  |   |                 |  |  |  |  |  |  |  |  |   |            |  |  |  |  |  |  |  |  |   |              |  |  |  |  |  |  |  |  |   |               |  |  |  |  |  |  |  |  |   |                     |  |  |  |  |  |  |  |  |   |                |  |  |  |  |  |  |  |  |   |                  |  |  |  |  |  |  |  |  |   |              |  |  |  |  |  |  |  |  |   |                 |  |  |  |  |  |  |  |  |   |                       |  |  |  |  |  |  |  |  |   |                         |  |  |  |  |  |  |  |  |     |             |  |  |  |  |  |  |  |  |     |       |  |  |  |  |  |  |  |  |     |     |  |  |  |  |  |  |  |  |
| R   | Electric Iron                                                                                                                                      |                                                                                                                                                                                                                                                                                                                                                                                                                                                                                                                                                                                                                                                                                                                                                                                                                                                                                                                                                                                                                                                                                                                                                                                                                                                                                                                                                                                                                                                                                                                                                                                                                                                                                                                                                                                                                                                                                                                                                                                                                                                                                                                                                                                                                                                                                                                                                                                                                                                                                                                                                                                                                                                                                                                                                                                                                                                                                                                                                                                                                                                                                                                                                                                                                                                                                                                                                                                                                                                                                                                                                                               |                            |          |          |         |          |           |         |  |           |   |                          |          |                            |          |          |         |          |           |         |   |                          |  |  |  |  |  |  |  |  |   |                  |  |  |  |  |  |  |  |  |   |     |  |  |  |  |  |  |  |  |   |     |  |  |  |  |  |  |  |  |   |       |  |  |  |  |  |  |  |  |   |               |  |  |  |  |  |  |  |  |   |                    |  |  |  |  |  |  |  |  |   |           |  |  |  |  |  |  |  |  |   |              |  |  |  |  |  |  |  |  |   |          |  |  |  |  |  |  |  |  |   |         |  |  |  |  |  |  |  |  |   |            |  |  |  |  |  |  |  |  |   |                         |  |  |  |  |  |  |  |  |   |             |  |  |  |  |  |  |  |  |   |                 |  |  |  |  |  |  |  |  |   |            |  |  |  |  |  |  |  |  |   |              |  |  |  |  |  |  |  |  |   |               |  |  |  |  |  |  |  |  |   |                     |  |  |  |  |  |  |  |  |   |                |  |  |  |  |  |  |  |  |   |                  |  |  |  |  |  |  |  |  |   |              |  |  |  |  |  |  |  |  |   |                 |  |  |  |  |  |  |  |  |   |                       |  |  |  |  |  |  |  |  |   |                         |  |  |  |  |  |  |  |  |     |             |  |  |  |  |  |  |  |  |     |       |  |  |  |  |  |  |  |  |     |     |  |  |  |  |  |  |  |  |
| S   | Electric Hair Dryer                                                                                                                                |                                                                                                                                                                                                                                                                                                                                                                                                                                                                                                                                                                                                                                                                                                                                                                                                                                                                                                                                                                                                                                                                                                                                                                                                                                                                                                                                                                                                                                                                                                                                                                                                                                                                                                                                                                                                                                                                                                                                                                                                                                                                                                                                                                                                                                                                                                                                                                                                                                                                                                                                                                                                                                                                                                                                                                                                                                                                                                                                                                                                                                                                                                                                                                                                                                                                                                                                                                                                                                                                                                                                                                               |                            |          |          |         |          |           |         |  |           |   |                          |          |                            |          |          |         |          |           |         |   |                          |  |  |  |  |  |  |  |  |   |                  |  |  |  |  |  |  |  |  |   |     |  |  |  |  |  |  |  |  |   |     |  |  |  |  |  |  |  |  |   |       |  |  |  |  |  |  |  |  |   |               |  |  |  |  |  |  |  |  |   |                    |  |  |  |  |  |  |  |  |   |           |  |  |  |  |  |  |  |  |   |              |  |  |  |  |  |  |  |  |   |          |  |  |  |  |  |  |  |  |   |         |  |  |  |  |  |  |  |  |   |            |  |  |  |  |  |  |  |  |   |                         |  |  |  |  |  |  |  |  |   |             |  |  |  |  |  |  |  |  |   |                 |  |  |  |  |  |  |  |  |   |            |  |  |  |  |  |  |  |  |   |              |  |  |  |  |  |  |  |  |   |               |  |  |  |  |  |  |  |  |   |                     |  |  |  |  |  |  |  |  |   |                |  |  |  |  |  |  |  |  |   |                  |  |  |  |  |  |  |  |  |   |              |  |  |  |  |  |  |  |  |   |                 |  |  |  |  |  |  |  |  |   |                       |  |  |  |  |  |  |  |  |   |                         |  |  |  |  |  |  |  |  |     |             |  |  |  |  |  |  |  |  |     |       |  |  |  |  |  |  |  |  |     |     |  |  |  |  |  |  |  |  |
| T   | Microwave Oven                                                                                                                                     |                                                                                                                                                                                                                                                                                                                                                                                                                                                                                                                                                                                                                                                                                                                                                                                                                                                                                                                                                                                                                                                                                                                                                                                                                                                                                                                                                                                                                                                                                                                                                                                                                                                                                                                                                                                                                                                                                                                                                                                                                                                                                                                                                                                                                                                                                                                                                                                                                                                                                                                                                                                                                                                                                                                                                                                                                                                                                                                                                                                                                                                                                                                                                                                                                                                                                                                                                                                                                                                                                                                                                                               |                            |          |          |         |          |           |         |  |           |   |                          |          |                            |          |          |         |          |           |         |   |                          |  |  |  |  |  |  |  |  |   |                  |  |  |  |  |  |  |  |  |   |     |  |  |  |  |  |  |  |  |   |     |  |  |  |  |  |  |  |  |   |       |  |  |  |  |  |  |  |  |   |               |  |  |  |  |  |  |  |  |   |                    |  |  |  |  |  |  |  |  |   |           |  |  |  |  |  |  |  |  |   |              |  |  |  |  |  |  |  |  |   |          |  |  |  |  |  |  |  |  |   |         |  |  |  |  |  |  |  |  |   |            |  |  |  |  |  |  |  |  |   |                         |  |  |  |  |  |  |  |  |   |             |  |  |  |  |  |  |  |  |   |                 |  |  |  |  |  |  |  |  |   |            |  |  |  |  |  |  |  |  |   |              |  |  |  |  |  |  |  |  |   |               |  |  |  |  |  |  |  |  |   |                     |  |  |  |  |  |  |  |  |   |                |  |  |  |  |  |  |  |  |   |                  |  |  |  |  |  |  |  |  |   |              |  |  |  |  |  |  |  |  |   |                 |  |  |  |  |  |  |  |  |   |                       |  |  |  |  |  |  |  |  |   |                         |  |  |  |  |  |  |  |  |     |             |  |  |  |  |  |  |  |  |     |       |  |  |  |  |  |  |  |  |     |     |  |  |  |  |  |  |  |  |
| U   | Electric Toaster                                                                                                                                   |                                                                                                                                                                                                                                                                                                                                                                                                                                                                                                                                                                                                                                                                                                                                                                                                                                                                                                                                                                                                                                                                                                                                                                                                                                                                                                                                                                                                                                                                                                                                                                                                                                                                                                                                                                                                                                                                                                                                                                                                                                                                                                                                                                                                                                                                                                                                                                                                                                                                                                                                                                                                                                                                                                                                                                                                                                                                                                                                                                                                                                                                                                                                                                                                                                                                                                                                                                                                                                                                                                                                                                               |                            |          |          |         |          |           |         |  |           |   |                          |          |                            |          |          |         |          |           |         |   |                          |  |  |  |  |  |  |  |  |   |                  |  |  |  |  |  |  |  |  |   |     |  |  |  |  |  |  |  |  |   |     |  |  |  |  |  |  |  |  |   |       |  |  |  |  |  |  |  |  |   |               |  |  |  |  |  |  |  |  |   |                    |  |  |  |  |  |  |  |  |   |           |  |  |  |  |  |  |  |  |   |              |  |  |  |  |  |  |  |  |   |          |  |  |  |  |  |  |  |  |   |         |  |  |  |  |  |  |  |  |   |            |  |  |  |  |  |  |  |  |   |                         |  |  |  |  |  |  |  |  |   |             |  |  |  |  |  |  |  |  |   |                 |  |  |  |  |  |  |  |  |   |            |  |  |  |  |  |  |  |  |   |              |  |  |  |  |  |  |  |  |   |               |  |  |  |  |  |  |  |  |   |                     |  |  |  |  |  |  |  |  |   |                |  |  |  |  |  |  |  |  |   |                  |  |  |  |  |  |  |  |  |   |              |  |  |  |  |  |  |  |  |   |                 |  |  |  |  |  |  |  |  |   |                       |  |  |  |  |  |  |  |  |   |                         |  |  |  |  |  |  |  |  |     |             |  |  |  |  |  |  |  |  |     |       |  |  |  |  |  |  |  |  |     |     |  |  |  |  |  |  |  |  |
| V   | Water Heater                                                                                                                                       |                                                                                                                                                                                                                                                                                                                                                                                                                                                                                                                                                                                                                                                                                                                                                                                                                                                                                                                                                                                                                                                                                                                                                                                                                                                                                                                                                                                                                                                                                                                                                                                                                                                                                                                                                                                                                                                                                                                                                                                                                                                                                                                                                                                                                                                                                                                                                                                                                                                                                                                                                                                                                                                                                                                                                                                                                                                                                                                                                                                                                                                                                                                                                                                                                                                                                                                                                                                                                                                                                                                                                                               |                            |          |          |         |          |           |         |  |           |   |                          |          |                            |          |          |         |          |           |         |   |                          |  |  |  |  |  |  |  |  |   |                  |  |  |  |  |  |  |  |  |   |     |  |  |  |  |  |  |  |  |   |     |  |  |  |  |  |  |  |  |   |       |  |  |  |  |  |  |  |  |   |               |  |  |  |  |  |  |  |  |   |                    |  |  |  |  |  |  |  |  |   |           |  |  |  |  |  |  |  |  |   |              |  |  |  |  |  |  |  |  |   |          |  |  |  |  |  |  |  |  |   |         |  |  |  |  |  |  |  |  |   |            |  |  |  |  |  |  |  |  |   |                         |  |  |  |  |  |  |  |  |   |             |  |  |  |  |  |  |  |  |   |                 |  |  |  |  |  |  |  |  |   |            |  |  |  |  |  |  |  |  |   |              |  |  |  |  |  |  |  |  |   |               |  |  |  |  |  |  |  |  |   |                     |  |  |  |  |  |  |  |  |   |                |  |  |  |  |  |  |  |  |   |                  |  |  |  |  |  |  |  |  |   |              |  |  |  |  |  |  |  |  |   |                 |  |  |  |  |  |  |  |  |   |                       |  |  |  |  |  |  |  |  |   |                         |  |  |  |  |  |  |  |  |     |             |  |  |  |  |  |  |  |  |     |       |  |  |  |  |  |  |  |  |     |     |  |  |  |  |  |  |  |  |
| W   | Air Conditioner                                                                                                                                    |                                                                                                                                                                                                                                                                                                                                                                                                                                                                                                                                                                                                                                                                                                                                                                                                                                                                                                                                                                                                                                                                                                                                                                                                                                                                                                                                                                                                                                                                                                                                                                                                                                                                                                                                                                                                                                                                                                                                                                                                                                                                                                                                                                                                                                                                                                                                                                                                                                                                                                                                                                                                                                                                                                                                                                                                                                                                                                                                                                                                                                                                                                                                                                                                                                                                                                                                                                                                                                                                                                                                                                               |                            |          |          |         |          |           |         |  |           |   |                          |          |                            |          |          |         |          |           |         |   |                          |  |  |  |  |  |  |  |  |   |                  |  |  |  |  |  |  |  |  |   |     |  |  |  |  |  |  |  |  |   |     |  |  |  |  |  |  |  |  |   |       |  |  |  |  |  |  |  |  |   |               |  |  |  |  |  |  |  |  |   |                    |  |  |  |  |  |  |  |  |   |           |  |  |  |  |  |  |  |  |   |              |  |  |  |  |  |  |  |  |   |          |  |  |  |  |  |  |  |  |   |         |  |  |  |  |  |  |  |  |   |            |  |  |  |  |  |  |  |  |   |                         |  |  |  |  |  |  |  |  |   |             |  |  |  |  |  |  |  |  |   |                 |  |  |  |  |  |  |  |  |   |            |  |  |  |  |  |  |  |  |   |              |  |  |  |  |  |  |  |  |   |               |  |  |  |  |  |  |  |  |   |                     |  |  |  |  |  |  |  |  |   |                |  |  |  |  |  |  |  |  |   |                  |  |  |  |  |  |  |  |  |   |              |  |  |  |  |  |  |  |  |   |                 |  |  |  |  |  |  |  |  |   |                       |  |  |  |  |  |  |  |  |   |                         |  |  |  |  |  |  |  |  |     |             |  |  |  |  |  |  |  |  |     |       |  |  |  |  |  |  |  |  |     |     |  |  |  |  |  |  |  |  |
| X   | Electric Space Heater                                                                                                                              |                                                                                                                                                                                                                                                                                                                                                                                                                                                                                                                                                                                                                                                                                                                                                                                                                                                                                                                                                                                                                                                                                                                                                                                                                                                                                                                                                                                                                                                                                                                                                                                                                                                                                                                                                                                                                                                                                                                                                                                                                                                                                                                                                                                                                                                                                                                                                                                                                                                                                                                                                                                                                                                                                                                                                                                                                                                                                                                                                                                                                                                                                                                                                                                                                                                                                                                                                                                                                                                                                                                                                                               |                            |          |          |         |          |           |         |  |           |   |                          |          |                            |          |          |         |          |           |         |   |                          |  |  |  |  |  |  |  |  |   |                  |  |  |  |  |  |  |  |  |   |     |  |  |  |  |  |  |  |  |   |     |  |  |  |  |  |  |  |  |   |       |  |  |  |  |  |  |  |  |   |               |  |  |  |  |  |  |  |  |   |                    |  |  |  |  |  |  |  |  |   |           |  |  |  |  |  |  |  |  |   |              |  |  |  |  |  |  |  |  |   |          |  |  |  |  |  |  |  |  |   |         |  |  |  |  |  |  |  |  |   |            |  |  |  |  |  |  |  |  |   |                         |  |  |  |  |  |  |  |  |   |             |  |  |  |  |  |  |  |  |   |                 |  |  |  |  |  |  |  |  |   |            |  |  |  |  |  |  |  |  |   |              |  |  |  |  |  |  |  |  |   |               |  |  |  |  |  |  |  |  |   |                     |  |  |  |  |  |  |  |  |   |                |  |  |  |  |  |  |  |  |   |                  |  |  |  |  |  |  |  |  |   |              |  |  |  |  |  |  |  |  |   |                 |  |  |  |  |  |  |  |  |   |                       |  |  |  |  |  |  |  |  |   |                         |  |  |  |  |  |  |  |  |     |             |  |  |  |  |  |  |  |  |     |       |  |  |  |  |  |  |  |  |     |     |  |  |  |  |  |  |  |  |
| Y   | Electric cooking system                                                                                                                            |                                                                                                                                                                                                                                                                                                                                                                                                                                                                                                                                                                                                                                                                                                                                                                                                                                                                                                                                                                                                                                                                                                                                                                                                                                                                                                                                                                                                                                                                                                                                                                                                                                                                                                                                                                                                                                                                                                                                                                                                                                                                                                                                                                                                                                                                                                                                                                                                                                                                                                                                                                                                                                                                                                                                                                                                                                                                                                                                                                                                                                                                                                                                                                                                                                                                                                                                                                                                                                                                                                                                                                               |                            |          |          |         |          |           |         |  |           |   |                          |          |                            |          |          |         |          |           |         |   |                          |  |  |  |  |  |  |  |  |   |                  |  |  |  |  |  |  |  |  |   |     |  |  |  |  |  |  |  |  |   |     |  |  |  |  |  |  |  |  |   |       |  |  |  |  |  |  |  |  |   |               |  |  |  |  |  |  |  |  |   |                    |  |  |  |  |  |  |  |  |   |           |  |  |  |  |  |  |  |  |   |              |  |  |  |  |  |  |  |  |   |          |  |  |  |  |  |  |  |  |   |         |  |  |  |  |  |  |  |  |   |            |  |  |  |  |  |  |  |  |   |                         |  |  |  |  |  |  |  |  |   |             |  |  |  |  |  |  |  |  |   |                 |  |  |  |  |  |  |  |  |   |            |  |  |  |  |  |  |  |  |   |              |  |  |  |  |  |  |  |  |   |               |  |  |  |  |  |  |  |  |   |                     |  |  |  |  |  |  |  |  |   |                |  |  |  |  |  |  |  |  |   |                  |  |  |  |  |  |  |  |  |   |              |  |  |  |  |  |  |  |  |   |                 |  |  |  |  |  |  |  |  |   |                       |  |  |  |  |  |  |  |  |   |                         |  |  |  |  |  |  |  |  |     |             |  |  |  |  |  |  |  |  |     |       |  |  |  |  |  |  |  |  |     |     |  |  |  |  |  |  |  |  |
| Z.1 | Dish Washer                                                                                                                                        |                                                                                                                                                                                                                                                                                                                                                                                                                                                                                                                                                                                                                                                                                                                                                                                                                                                                                                                                                                                                                                                                                                                                                                                                                                                                                                                                                                                                                                                                                                                                                                                                                                                                                                                                                                                                                                                                                                                                                                                                                                                                                                                                                                                                                                                                                                                                                                                                                                                                                                                                                                                                                                                                                                                                                                                                                                                                                                                                                                                                                                                                                                                                                                                                                                                                                                                                                                                                                                                                                                                                                                               |                            |          |          |         |          |           |         |  |           |   |                          |          |                            |          |          |         |          |           |         |   |                          |  |  |  |  |  |  |  |  |   |                  |  |  |  |  |  |  |  |  |   |     |  |  |  |  |  |  |  |  |   |     |  |  |  |  |  |  |  |  |   |       |  |  |  |  |  |  |  |  |   |               |  |  |  |  |  |  |  |  |   |                    |  |  |  |  |  |  |  |  |   |           |  |  |  |  |  |  |  |  |   |              |  |  |  |  |  |  |  |  |   |          |  |  |  |  |  |  |  |  |   |         |  |  |  |  |  |  |  |  |   |            |  |  |  |  |  |  |  |  |   |                         |  |  |  |  |  |  |  |  |   |             |  |  |  |  |  |  |  |  |   |                 |  |  |  |  |  |  |  |  |   |            |  |  |  |  |  |  |  |  |   |              |  |  |  |  |  |  |  |  |   |               |  |  |  |  |  |  |  |  |   |                     |  |  |  |  |  |  |  |  |   |                |  |  |  |  |  |  |  |  |   |                  |  |  |  |  |  |  |  |  |   |              |  |  |  |  |  |  |  |  |   |                 |  |  |  |  |  |  |  |  |   |                       |  |  |  |  |  |  |  |  |   |                         |  |  |  |  |  |  |  |  |     |             |  |  |  |  |  |  |  |  |     |       |  |  |  |  |  |  |  |  |     |     |  |  |  |  |  |  |  |  |
| Z.2 | OTHER                                                                                                                                              |                                                                                                                                                                                                                                                                                                                                                                                                                                                                                                                                                                                                                                                                                                                                                                                                                                                                                                                                                                                                                                                                                                                                                                                                                                                                                                                                                                                                                                                                                                                                                                                                                                                                                                                                                                                                                                                                                                                                                                                                                                                                                                                                                                                                                                                                                                                                                                                                                                                                                                                                                                                                                                                                                                                                                                                                                                                                                                                                                                                                                                                                                                                                                                                                                                                                                                                                                                                                                                                                                                                                                                               |                            |          |          |         |          |           |         |  |           |   |                          |          |                            |          |          |         |          |           |         |   |                          |  |  |  |  |  |  |  |  |   |                  |  |  |  |  |  |  |  |  |   |     |  |  |  |  |  |  |  |  |   |     |  |  |  |  |  |  |  |  |   |       |  |  |  |  |  |  |  |  |   |               |  |  |  |  |  |  |  |  |   |                    |  |  |  |  |  |  |  |  |   |           |  |  |  |  |  |  |  |  |   |              |  |  |  |  |  |  |  |  |   |          |  |  |  |  |  |  |  |  |   |         |  |  |  |  |  |  |  |  |   |            |  |  |  |  |  |  |  |  |   |                         |  |  |  |  |  |  |  |  |   |             |  |  |  |  |  |  |  |  |   |                 |  |  |  |  |  |  |  |  |   |            |  |  |  |  |  |  |  |  |   |              |  |  |  |  |  |  |  |  |   |               |  |  |  |  |  |  |  |  |   |                     |  |  |  |  |  |  |  |  |   |                |  |  |  |  |  |  |  |  |   |                  |  |  |  |  |  |  |  |  |   |              |  |  |  |  |  |  |  |  |   |                 |  |  |  |  |  |  |  |  |   |                       |  |  |  |  |  |  |  |  |   |                         |  |  |  |  |  |  |  |  |     |             |  |  |  |  |  |  |  |  |     |       |  |  |  |  |  |  |  |  |     |     |  |  |  |  |  |  |  |  |
| Z.3 | ...                                                                                                                                                |                                                                                                                                                                                                                                                                                                                                                                                                                                                                                                                                                                                                                                                                                                                                                                                                                                                                                                                                                                                                                                                                                                                                                                                                                                                                                                                                                                                                                                                                                                                                                                                                                                                                                                                                                                                                                                                                                                                                                                                                                                                                                                                                                                                                                                                                                                                                                                                                                                                                                                                                                                                                                                                                                                                                                                                                                                                                                                                                                                                                                                                                                                                                                                                                                                                                                                                                                                                                                                                                                                                                                                               |                            |          |          |         |          |           |         |  |           |   |                          |          |                            |          |          |         |          |           |         |   |                          |  |  |  |  |  |  |  |  |   |                  |  |  |  |  |  |  |  |  |   |     |  |  |  |  |  |  |  |  |   |     |  |  |  |  |  |  |  |  |   |       |  |  |  |  |  |  |  |  |   |               |  |  |  |  |  |  |  |  |   |                    |  |  |  |  |  |  |  |  |   |           |  |  |  |  |  |  |  |  |   |              |  |  |  |  |  |  |  |  |   |          |  |  |  |  |  |  |  |  |   |         |  |  |  |  |  |  |  |  |   |            |  |  |  |  |  |  |  |  |   |                         |  |  |  |  |  |  |  |  |   |             |  |  |  |  |  |  |  |  |   |                 |  |  |  |  |  |  |  |  |   |            |  |  |  |  |  |  |  |  |   |              |  |  |  |  |  |  |  |  |   |               |  |  |  |  |  |  |  |  |   |                     |  |  |  |  |  |  |  |  |   |                |  |  |  |  |  |  |  |  |   |                  |  |  |  |  |  |  |  |  |   |              |  |  |  |  |  |  |  |  |   |                 |  |  |  |  |  |  |  |  |   |                       |  |  |  |  |  |  |  |  |   |                         |  |  |  |  |  |  |  |  |     |             |  |  |  |  |  |  |  |  |     |       |  |  |  |  |  |  |  |  |     |     |  |  |  |  |  |  |  |  |
| B.2 | Do you use your appliances always at those times the most?                                                                                         | <input type="checkbox"/> Yes, always<br><input type="checkbox"/> No, only during the week, specify: _____<br><input type="checkbox"/> No, depends on the season: specify: _____<br><input type="checkbox"/> Other: _____                                                                                                                                                                                                                                                                                                                                                                                                                                                                                                                                                                                                                                                                                                                                                                                                                                                                                                                                                                                                                                                                                                                                                                                                                                                                                                                                                                                                                                                                                                                                                                                                                                                                                                                                                                                                                                                                                                                                                                                                                                                                                                                                                                                                                                                                                                                                                                                                                                                                                                                                                                                                                                                                                                                                                                                                                                                                                                                                                                                                                                                                                                                                                                                                                                                                                                                                                      |                            |          |          |         |          |           |         |  |           |   |                          |          |                            |          |          |         |          |           |         |   |                          |  |  |  |  |  |  |  |  |   |                  |  |  |  |  |  |  |  |  |   |     |  |  |  |  |  |  |  |  |   |     |  |  |  |  |  |  |  |  |   |       |  |  |  |  |  |  |  |  |   |               |  |  |  |  |  |  |  |  |   |                    |  |  |  |  |  |  |  |  |   |           |  |  |  |  |  |  |  |  |   |              |  |  |  |  |  |  |  |  |   |          |  |  |  |  |  |  |  |  |   |         |  |  |  |  |  |  |  |  |   |            |  |  |  |  |  |  |  |  |   |                         |  |  |  |  |  |  |  |  |   |             |  |  |  |  |  |  |  |  |   |                 |  |  |  |  |  |  |  |  |   |            |  |  |  |  |  |  |  |  |   |              |  |  |  |  |  |  |  |  |   |               |  |  |  |  |  |  |  |  |   |                     |  |  |  |  |  |  |  |  |   |                |  |  |  |  |  |  |  |  |   |                  |  |  |  |  |  |  |  |  |   |              |  |  |  |  |  |  |  |  |   |                 |  |  |  |  |  |  |  |  |   |                       |  |  |  |  |  |  |  |  |   |                         |  |  |  |  |  |  |  |  |     |             |  |  |  |  |  |  |  |  |     |       |  |  |  |  |  |  |  |  |     |     |  |  |  |  |  |  |  |  |
| B.3 | In the last 3 months, has any appliance caused tripping OR have you been advised not to use any appliance with your primary source of electricity? | <table border="1"> <thead> <tr> <th></th><th>Appliance</th></tr> </thead> <tbody> <tr><td>A</td><td>Incandescent Light Bulbs</td></tr> <tr><td>B</td><td>Fluorescent Tube</td></tr> <tr><td>C</td><td>CFL</td></tr> <tr><td>D</td><td>LED</td></tr> <tr><td>E</td><td>Radio</td></tr> </tbody> </table>                                                                                                                                                                                                                                                                                                                                                                                                                                                                                                                                                                                                                                                                                                                                                                                                                                                                                                                                                                                                                                                                                                                                                                                                                                                                                                                                                                                                                                                                                                                                                                                                                                                                                                                                                                                                                                                                                                                                                                                                                                                                                                                                                                                                                                                                                                                                                                                                                                                                                                                                                                                                                                                                                                                                                                                                                                                                                                                                                                                                                                                                                                                                                                                                                                                                       |                            |          |          |         |          |           |         |  | Appliance | A | Incandescent Light Bulbs | B        | Fluorescent Tube           | C        | CFL      | D       | LED      | E         | Radio   |   |                          |  |  |  |  |  |  |  |  |   |                  |  |  |  |  |  |  |  |  |   |     |  |  |  |  |  |  |  |  |   |     |  |  |  |  |  |  |  |  |   |       |  |  |  |  |  |  |  |  |   |               |  |  |  |  |  |  |  |  |   |                    |  |  |  |  |  |  |  |  |   |           |  |  |  |  |  |  |  |  |   |              |  |  |  |  |  |  |  |  |   |          |  |  |  |  |  |  |  |  |   |         |  |  |  |  |  |  |  |  |   |            |  |  |  |  |  |  |  |  |   |                         |  |  |  |  |  |  |  |  |   |             |  |  |  |  |  |  |  |  |   |                 |  |  |  |  |  |  |  |  |   |            |  |  |  |  |  |  |  |  |   |              |  |  |  |  |  |  |  |  |   |               |  |  |  |  |  |  |  |  |   |                     |  |  |  |  |  |  |  |  |   |                |  |  |  |  |  |  |  |  |   |                  |  |  |  |  |  |  |  |  |   |              |  |  |  |  |  |  |  |  |   |                 |  |  |  |  |  |  |  |  |   |                       |  |  |  |  |  |  |  |  |   |                         |  |  |  |  |  |  |  |  |     |             |  |  |  |  |  |  |  |  |     |       |  |  |  |  |  |  |  |  |     |     |  |  |  |  |  |  |  |  |
|     | Appliance                                                                                                                                          |                                                                                                                                                                                                                                                                                                                                                                                                                                                                                                                                                                                                                                                                                                                                                                                                                                                                                                                                                                                                                                                                                                                                                                                                                                                                                                                                                                                                                                                                                                                                                                                                                                                                                                                                                                                                                                                                                                                                                                                                                                                                                                                                                                                                                                                                                                                                                                                                                                                                                                                                                                                                                                                                                                                                                                                                                                                                                                                                                                                                                                                                                                                                                                                                                                                                                                                                                                                                                                                                                                                                                                               |                            |          |          |         |          |           |         |  |           |   |                          |          |                            |          |          |         |          |           |         |   |                          |  |  |  |  |  |  |  |  |   |                  |  |  |  |  |  |  |  |  |   |     |  |  |  |  |  |  |  |  |   |     |  |  |  |  |  |  |  |  |   |       |  |  |  |  |  |  |  |  |   |               |  |  |  |  |  |  |  |  |   |                    |  |  |  |  |  |  |  |  |   |           |  |  |  |  |  |  |  |  |   |              |  |  |  |  |  |  |  |  |   |          |  |  |  |  |  |  |  |  |   |         |  |  |  |  |  |  |  |  |   |            |  |  |  |  |  |  |  |  |   |                         |  |  |  |  |  |  |  |  |   |             |  |  |  |  |  |  |  |  |   |                 |  |  |  |  |  |  |  |  |   |            |  |  |  |  |  |  |  |  |   |              |  |  |  |  |  |  |  |  |   |               |  |  |  |  |  |  |  |  |   |                     |  |  |  |  |  |  |  |  |   |                |  |  |  |  |  |  |  |  |   |                  |  |  |  |  |  |  |  |  |   |              |  |  |  |  |  |  |  |  |   |                 |  |  |  |  |  |  |  |  |   |                       |  |  |  |  |  |  |  |  |   |                         |  |  |  |  |  |  |  |  |     |             |  |  |  |  |  |  |  |  |     |       |  |  |  |  |  |  |  |  |     |     |  |  |  |  |  |  |  |  |
| A   | Incandescent Light Bulbs                                                                                                                           |                                                                                                                                                                                                                                                                                                                                                                                                                                                                                                                                                                                                                                                                                                                                                                                                                                                                                                                                                                                                                                                                                                                                                                                                                                                                                                                                                                                                                                                                                                                                                                                                                                                                                                                                                                                                                                                                                                                                                                                                                                                                                                                                                                                                                                                                                                                                                                                                                                                                                                                                                                                                                                                                                                                                                                                                                                                                                                                                                                                                                                                                                                                                                                                                                                                                                                                                                                                                                                                                                                                                                                               |                            |          |          |         |          |           |         |  |           |   |                          |          |                            |          |          |         |          |           |         |   |                          |  |  |  |  |  |  |  |  |   |                  |  |  |  |  |  |  |  |  |   |     |  |  |  |  |  |  |  |  |   |     |  |  |  |  |  |  |  |  |   |       |  |  |  |  |  |  |  |  |   |               |  |  |  |  |  |  |  |  |   |                    |  |  |  |  |  |  |  |  |   |           |  |  |  |  |  |  |  |  |   |              |  |  |  |  |  |  |  |  |   |          |  |  |  |  |  |  |  |  |   |         |  |  |  |  |  |  |  |  |   |            |  |  |  |  |  |  |  |  |   |                         |  |  |  |  |  |  |  |  |   |             |  |  |  |  |  |  |  |  |   |                 |  |  |  |  |  |  |  |  |   |            |  |  |  |  |  |  |  |  |   |              |  |  |  |  |  |  |  |  |   |               |  |  |  |  |  |  |  |  |   |                     |  |  |  |  |  |  |  |  |   |                |  |  |  |  |  |  |  |  |   |                  |  |  |  |  |  |  |  |  |   |              |  |  |  |  |  |  |  |  |   |                 |  |  |  |  |  |  |  |  |   |                       |  |  |  |  |  |  |  |  |   |                         |  |  |  |  |  |  |  |  |     |             |  |  |  |  |  |  |  |  |     |       |  |  |  |  |  |  |  |  |     |     |  |  |  |  |  |  |  |  |
| B   | Fluorescent Tube                                                                                                                                   |                                                                                                                                                                                                                                                                                                                                                                                                                                                                                                                                                                                                                                                                                                                                                                                                                                                                                                                                                                                                                                                                                                                                                                                                                                                                                                                                                                                                                                                                                                                                                                                                                                                                                                                                                                                                                                                                                                                                                                                                                                                                                                                                                                                                                                                                                                                                                                                                                                                                                                                                                                                                                                                                                                                                                                                                                                                                                                                                                                                                                                                                                                                                                                                                                                                                                                                                                                                                                                                                                                                                                                               |                            |          |          |         |          |           |         |  |           |   |                          |          |                            |          |          |         |          |           |         |   |                          |  |  |  |  |  |  |  |  |   |                  |  |  |  |  |  |  |  |  |   |     |  |  |  |  |  |  |  |  |   |     |  |  |  |  |  |  |  |  |   |       |  |  |  |  |  |  |  |  |   |               |  |  |  |  |  |  |  |  |   |                    |  |  |  |  |  |  |  |  |   |           |  |  |  |  |  |  |  |  |   |              |  |  |  |  |  |  |  |  |   |          |  |  |  |  |  |  |  |  |   |         |  |  |  |  |  |  |  |  |   |            |  |  |  |  |  |  |  |  |   |                         |  |  |  |  |  |  |  |  |   |             |  |  |  |  |  |  |  |  |   |                 |  |  |  |  |  |  |  |  |   |            |  |  |  |  |  |  |  |  |   |              |  |  |  |  |  |  |  |  |   |               |  |  |  |  |  |  |  |  |   |                     |  |  |  |  |  |  |  |  |   |                |  |  |  |  |  |  |  |  |   |                  |  |  |  |  |  |  |  |  |   |              |  |  |  |  |  |  |  |  |   |                 |  |  |  |  |  |  |  |  |   |                       |  |  |  |  |  |  |  |  |   |                         |  |  |  |  |  |  |  |  |     |             |  |  |  |  |  |  |  |  |     |       |  |  |  |  |  |  |  |  |     |     |  |  |  |  |  |  |  |  |
| C   | CFL                                                                                                                                                |                                                                                                                                                                                                                                                                                                                                                                                                                                                                                                                                                                                                                                                                                                                                                                                                                                                                                                                                                                                                                                                                                                                                                                                                                                                                                                                                                                                                                                                                                                                                                                                                                                                                                                                                                                                                                                                                                                                                                                                                                                                                                                                                                                                                                                                                                                                                                                                                                                                                                                                                                                                                                                                                                                                                                                                                                                                                                                                                                                                                                                                                                                                                                                                                                                                                                                                                                                                                                                                                                                                                                                               |                            |          |          |         |          |           |         |  |           |   |                          |          |                            |          |          |         |          |           |         |   |                          |  |  |  |  |  |  |  |  |   |                  |  |  |  |  |  |  |  |  |   |     |  |  |  |  |  |  |  |  |   |     |  |  |  |  |  |  |  |  |   |       |  |  |  |  |  |  |  |  |   |               |  |  |  |  |  |  |  |  |   |                    |  |  |  |  |  |  |  |  |   |           |  |  |  |  |  |  |  |  |   |              |  |  |  |  |  |  |  |  |   |          |  |  |  |  |  |  |  |  |   |         |  |  |  |  |  |  |  |  |   |            |  |  |  |  |  |  |  |  |   |                         |  |  |  |  |  |  |  |  |   |             |  |  |  |  |  |  |  |  |   |                 |  |  |  |  |  |  |  |  |   |            |  |  |  |  |  |  |  |  |   |              |  |  |  |  |  |  |  |  |   |               |  |  |  |  |  |  |  |  |   |                     |  |  |  |  |  |  |  |  |   |                |  |  |  |  |  |  |  |  |   |                  |  |  |  |  |  |  |  |  |   |              |  |  |  |  |  |  |  |  |   |                 |  |  |  |  |  |  |  |  |   |                       |  |  |  |  |  |  |  |  |   |                         |  |  |  |  |  |  |  |  |     |             |  |  |  |  |  |  |  |  |     |       |  |  |  |  |  |  |  |  |     |     |  |  |  |  |  |  |  |  |
| D   | LED                                                                                                                                                |                                                                                                                                                                                                                                                                                                                                                                                                                                                                                                                                                                                                                                                                                                                                                                                                                                                                                                                                                                                                                                                                                                                                                                                                                                                                                                                                                                                                                                                                                                                                                                                                                                                                                                                                                                                                                                                                                                                                                                                                                                                                                                                                                                                                                                                                                                                                                                                                                                                                                                                                                                                                                                                                                                                                                                                                                                                                                                                                                                                                                                                                                                                                                                                                                                                                                                                                                                                                                                                                                                                                                                               |                            |          |          |         |          |           |         |  |           |   |                          |          |                            |          |          |         |          |           |         |   |                          |  |  |  |  |  |  |  |  |   |                  |  |  |  |  |  |  |  |  |   |     |  |  |  |  |  |  |  |  |   |     |  |  |  |  |  |  |  |  |   |       |  |  |  |  |  |  |  |  |   |               |  |  |  |  |  |  |  |  |   |                    |  |  |  |  |  |  |  |  |   |           |  |  |  |  |  |  |  |  |   |              |  |  |  |  |  |  |  |  |   |          |  |  |  |  |  |  |  |  |   |         |  |  |  |  |  |  |  |  |   |            |  |  |  |  |  |  |  |  |   |                         |  |  |  |  |  |  |  |  |   |             |  |  |  |  |  |  |  |  |   |                 |  |  |  |  |  |  |  |  |   |            |  |  |  |  |  |  |  |  |   |              |  |  |  |  |  |  |  |  |   |               |  |  |  |  |  |  |  |  |   |                     |  |  |  |  |  |  |  |  |   |                |  |  |  |  |  |  |  |  |   |                  |  |  |  |  |  |  |  |  |   |              |  |  |  |  |  |  |  |  |   |                 |  |  |  |  |  |  |  |  |   |                       |  |  |  |  |  |  |  |  |   |                         |  |  |  |  |  |  |  |  |     |             |  |  |  |  |  |  |  |  |     |       |  |  |  |  |  |  |  |  |     |     |  |  |  |  |  |  |  |  |
| E   | Radio                                                                                                                                              |                                                                                                                                                                                                                                                                                                                                                                                                                                                                                                                                                                                                                                                                                                                                                                                                                                                                                                                                                                                                                                                                                                                                                                                                                                                                                                                                                                                                                                                                                                                                                                                                                                                                                                                                                                                                                                                                                                                                                                                                                                                                                                                                                                                                                                                                                                                                                                                                                                                                                                                                                                                                                                                                                                                                                                                                                                                                                                                                                                                                                                                                                                                                                                                                                                                                                                                                                                                                                                                                                                                                                                               |                            |          |          |         |          |           |         |  |           |   |                          |          |                            |          |          |         |          |           |         |   |                          |  |  |  |  |  |  |  |  |   |                  |  |  |  |  |  |  |  |  |   |     |  |  |  |  |  |  |  |  |   |     |  |  |  |  |  |  |  |  |   |       |  |  |  |  |  |  |  |  |   |               |  |  |  |  |  |  |  |  |   |                    |  |  |  |  |  |  |  |  |   |           |  |  |  |  |  |  |  |  |   |              |  |  |  |  |  |  |  |  |   |          |  |  |  |  |  |  |  |  |   |         |  |  |  |  |  |  |  |  |   |            |  |  |  |  |  |  |  |  |   |                         |  |  |  |  |  |  |  |  |   |             |  |  |  |  |  |  |  |  |   |                 |  |  |  |  |  |  |  |  |   |            |  |  |  |  |  |  |  |  |   |              |  |  |  |  |  |  |  |  |   |               |  |  |  |  |  |  |  |  |   |                     |  |  |  |  |  |  |  |  |   |                |  |  |  |  |  |  |  |  |   |                  |  |  |  |  |  |  |  |  |   |              |  |  |  |  |  |  |  |  |   |                 |  |  |  |  |  |  |  |  |   |                       |  |  |  |  |  |  |  |  |   |                         |  |  |  |  |  |  |  |  |     |             |  |  |  |  |  |  |  |  |     |       |  |  |  |  |  |  |  |  |     |     |  |  |  |  |  |  |  |  |

# Multi-tier Framework Questionnaire: Bangladesh

|  |  |     |                         |  |
|--|--|-----|-------------------------|--|
|  |  | F   | Phone charger           |  |
|  |  | G   | Black and white TV      |  |
|  |  | H   | Colour TV               |  |
|  |  | I   | Electric Fan            |  |
|  |  | J   | Computer                |  |
|  |  | K   | Printer                 |  |
|  |  | L   | Air Cooler              |  |
|  |  | M   | Electric Food Processor |  |
|  |  | N   | Rice Cooker             |  |
|  |  | O   | Washing Machine         |  |
|  |  | P   | Water Pump              |  |
|  |  | Q   | Refrigerator            |  |
|  |  | R   | Electric Iron           |  |
|  |  | S   | Electric Hair Dryer     |  |
|  |  | T   | Microwave Oven          |  |
|  |  | U   | Electric Toaster        |  |
|  |  | V   | Water Heater            |  |
|  |  | W   | Air Conditioner         |  |
|  |  | X   | Electric Space Heater   |  |
|  |  | Y   | Electric cooking system |  |
|  |  | Z.1 | Dish Washer             |  |
|  |  | Z.2 | OTHER                   |  |
|  |  | Z.3 | ...                     |  |
|  |  |     |                         |  |

**MODULE AB: SOURCES OF LIGHTING USED WITHIN THE HOUSEHOLD**

(All households should respond)

| ENERGY SOURCES FOR LIGHTING                |                                                                   |                                                   |                                                                                                                                                                                            |                                                                                                                              |                                                             |
|--------------------------------------------|-------------------------------------------------------------------|---------------------------------------------------|--------------------------------------------------------------------------------------------------------------------------------------------------------------------------------------------|------------------------------------------------------------------------------------------------------------------------------|-------------------------------------------------------------|
|                                            | AB                                                                | AB.01                                             | AB.02                                                                                                                                                                                      | AB.03                                                                                                                        | AB.04                                                       |
| Type of lighting source                    | Does the household use this energy source for lighting?           | How many lamps/bulbs do you use? [number]         | What is the frequency of use?                                                                                                                                                              | On average, how much do you spend per month for each lighting fuel? [currency]                                               | On average, what quantity of fuel to do use each month?     |
| a. Candle                                  | <input type="checkbox"/> 1. Yes<br><input type="checkbox"/> 2. No |                                                   | <input type="checkbox"/> Every day or almost<br><input type="checkbox"/> Few times per week<br><input type="checkbox"/> Few times per month<br><input type="checkbox"/> Few times per year | <input type="checkbox"/> <input type="checkbox"/> <input type="checkbox"/> <input type="checkbox"/> <input type="checkbox"/> | <input type="checkbox"/> <input type="checkbox"/> candles   |
| b. Kerosene lamp                           | <input type="checkbox"/> 1. Yes<br><input type="checkbox"/> 2. No | <input type="checkbox"/> <input type="checkbox"/> | <input type="checkbox"/> Every day or almost<br><input type="checkbox"/> Few times per week<br><input type="checkbox"/> Few times per month<br><input type="checkbox"/> Few times per year | <input type="checkbox"/> <input type="checkbox"/> <input type="checkbox"/> <input type="checkbox"/> <input type="checkbox"/> | <input type="checkbox"/> <input type="checkbox"/> liters    |
| c. Diesel/gasoline lamp                    | <input type="checkbox"/> 1. Yes<br><input type="checkbox"/> 2. No | <input type="checkbox"/> <input type="checkbox"/> | <input type="checkbox"/> Every day or almost<br><input type="checkbox"/> Few times per week<br><input type="checkbox"/> Few times per month<br><input type="checkbox"/> Few times per year | <input type="checkbox"/> <input type="checkbox"/> <input type="checkbox"/> <input type="checkbox"/> <input type="checkbox"/> | <input type="checkbox"/> <input type="checkbox"/> liters    |
| d. LPG lamp                                | <input type="checkbox"/> 1. Yes<br><input type="checkbox"/> 2. No | <input type="checkbox"/> <input type="checkbox"/> | <input type="checkbox"/> Every day or almost<br><input type="checkbox"/> Few times per week<br><input type="checkbox"/> Few times per month<br><input type="checkbox"/> Few times per year | <input type="checkbox"/> <input type="checkbox"/> <input type="checkbox"/> <input type="checkbox"/> <input type="checkbox"/> | <input type="checkbox"/> <input type="checkbox"/> cylinders |
| e. Biogas lamp                             | <input type="checkbox"/> 1. Yes<br><input type="checkbox"/> 2. No | <input type="checkbox"/> <input type="checkbox"/> | <input type="checkbox"/> Every day or almost<br><input type="checkbox"/> Few times per week<br><input type="checkbox"/> Few times per month<br><input type="checkbox"/> Few times per year | <input type="checkbox"/> <input type="checkbox"/> <input type="checkbox"/> <input type="checkbox"/> <input type="checkbox"/> |                                                             |
| f. Dry-cell battery torch                  | <input type="checkbox"/> 1. Yes<br><input type="checkbox"/> 2. No | <input type="checkbox"/> <input type="checkbox"/> | <input type="checkbox"/> Every day or almost<br><input type="checkbox"/> Few times per week<br><input type="checkbox"/> Few times per month<br><input type="checkbox"/> Few times per year | <input type="checkbox"/> <input type="checkbox"/> <input type="checkbox"/> <input type="checkbox"/> <input type="checkbox"/> | <input type="checkbox"/> <input type="checkbox"/> batteries |
| g. Rechargeable battery (e.g. car battery) | <input type="checkbox"/> 1. Yes<br><input type="checkbox"/> 2. No | <input type="checkbox"/> <input type="checkbox"/> | <input type="checkbox"/> Every day or almost<br><input type="checkbox"/> Few times per week<br><input type="checkbox"/> Few times per month<br><input type="checkbox"/> Few times per year | <input type="checkbox"/> <input type="checkbox"/> <input type="checkbox"/> <input type="checkbox"/> <input type="checkbox"/> | <input type="checkbox"/> <input type="checkbox"/> recharges |
| h. solar lantern                           | <input type="checkbox"/> 1. Yes<br><input type="checkbox"/> 2. No | <input type="checkbox"/> <input type="checkbox"/> | <input type="checkbox"/> Every day or almost<br><input type="checkbox"/> Few times per week<br><input type="checkbox"/> Few times per month<br><input type="checkbox"/> Few times per year | <input type="checkbox"/> <input type="checkbox"/> <input type="checkbox"/> <input type="checkbox"/> <input type="checkbox"/> |                                                             |
| i. solar home system                       | <input type="checkbox"/> 1. Yes<br><input type="checkbox"/> 2. No | <input type="checkbox"/> <input type="checkbox"/> | <input type="checkbox"/> Every day or almost<br><input type="checkbox"/> Few times per week<br><input type="checkbox"/> Few times per month<br><input type="checkbox"/> Few times per year | <input type="checkbox"/> <input type="checkbox"/> <input type="checkbox"/> <input type="checkbox"/> <input type="checkbox"/> |                                                             |
| j. mini-grid                               | <input type="checkbox"/> 1. Yes<br><input type="checkbox"/> 2. No | <input type="checkbox"/> <input type="checkbox"/> | <input type="checkbox"/> Every day or almost<br><input type="checkbox"/> Few times per week<br><input type="checkbox"/> Few times per month<br><input type="checkbox"/> Few times per year |                                                                                                                              |                                                             |
| k. national grid                           | <input type="checkbox"/> 1. Yes<br><input type="checkbox"/> 2. No | <input type="checkbox"/> <input type="checkbox"/> | <input type="checkbox"/> Every day or almost<br><input type="checkbox"/> Few times per week<br><input type="checkbox"/> Few times per month<br><input type="checkbox"/> Few times per year |                                                                                                                              |                                                             |
| l. Others (specify)<br>_____               | <input type="checkbox"/> 1. Yes<br><input type="checkbox"/> 2. No | <input type="checkbox"/> <input type="checkbox"/> | <input type="checkbox"/> Every day or almost<br><input type="checkbox"/> Few times per week<br><input type="checkbox"/> Few times per month<br><input type="checkbox"/> Few times per year | <input type="checkbox"/> <input type="checkbox"/> <input type="checkbox"/> <input type="checkbox"/> <input type="checkbox"/> | <input type="checkbox"/> <input type="checkbox"/> [unit]    |

## Multi-tier Framework Questionnaire: Bangladesh

### MODULE AC: SOLAR BASED LIGHTING SYSTEMS

Only households that have responded yes to **AB.01.h** (solar lantern) and **AB.01.i** (solar home system); please ask for the installment plan/ documentation

| QUALITY OF SUPPLY  |                                                                                                         |                                                                                                                                                                                                                                                                                                                                                                                                                                                                                                                                                                                                   |         |          |           |         |  |  |          |          |         |          |           |         |       |  |  |  |  |  |  |     |  |  |  |  |  |  |    |  |  |  |  |  |  |        |  |  |  |  |  |  |
|--------------------|---------------------------------------------------------------------------------------------------------|---------------------------------------------------------------------------------------------------------------------------------------------------------------------------------------------------------------------------------------------------------------------------------------------------------------------------------------------------------------------------------------------------------------------------------------------------------------------------------------------------------------------------------------------------------------------------------------------------|---------|----------|-----------|---------|--|--|----------|----------|---------|----------|-----------|---------|-------|--|--|--|--|--|--|-----|--|--|--|--|--|--|----|--|--|--|--|--|--|--------|--|--|--|--|--|--|
| AC. 01             | How many solar systems or devices do you currently use in the household?                                | <input type="text"/> <input type="text"/> [number]                                                                                                                                                                                                                                                                                                                                                                                                                                                                                                                                                |         |          |           |         |  |  |          |          |         |          |           |         |       |  |  |  |  |  |  |     |  |  |  |  |  |  |    |  |  |  |  |  |  |        |  |  |  |  |  |  |
| PRIMARY SYSTEM (A) |                                                                                                         |                                                                                                                                                                                                                                                                                                                                                                                                                                                                                                                                                                                                   |         |          |           |         |  |  |          |          |         |          |           |         |       |  |  |  |  |  |  |     |  |  |  |  |  |  |    |  |  |  |  |  |  |        |  |  |  |  |  |  |
| AC.02a             | In this device, are the solar panel and the storage battery together or separate (connected by a wire)? | <input type="checkbox"/> 1. Together, in a single casing<br><input type="checkbox"/> 2. Separate, connected by a wire<br><input type="checkbox"/> 3. There is no storage battery                                                                                                                                                                                                                                                                                                                                                                                                                  |         |          |           |         |  |  |          |          |         |          |           |         |       |  |  |  |  |  |  |     |  |  |  |  |  |  |    |  |  |  |  |  |  |        |  |  |  |  |  |  |
| AC. 03a            | In this device, are the battery and the bulb together or separate?                                      | <input type="checkbox"/> 1. At least one light bulb is separated from the battery by a wire<br><input type="checkbox"/> 2. Light bulbs are together with the battery<br><input type="checkbox"/> 3. This system or device does not power any lights<br><input type="checkbox"/> 4. There is no storage battery                                                                                                                                                                                                                                                                                    |         |          |           |         |  |  |          |          |         |          |           |         |       |  |  |  |  |  |  |     |  |  |  |  |  |  |    |  |  |  |  |  |  |        |  |  |  |  |  |  |
| AC.04a             | In this device, how many light bulbs do you have?                                                       | <input type="checkbox"/> 1. One light bulb<br><input type="checkbox"/> 2. Two light bulbs (that can be separated from each other)<br><input type="checkbox"/> 3. Three (that can be separated from each other)<br><input type="checkbox"/> 4. Four (that can be separated from each other)<br><input type="checkbox"/> 5. Five or more light bulbs (that can be separated from each other)<br><input type="checkbox"/> 6. Zero – this system or device does not power lights                                                                                                                      |         |          |           |         |  |  |          |          |         |          |           |         |       |  |  |  |  |  |  |     |  |  |  |  |  |  |    |  |  |  |  |  |  |        |  |  |  |  |  |  |
| AC. 05a            | What type of light bulbs do you use?                                                                    | <input type="checkbox"/> 1. LED<br><input type="checkbox"/> 2. CFL<br><input type="checkbox"/> 3. Incandescent<br><input type="checkbox"/> 4. Other (Specify) _____                                                                                                                                                                                                                                                                                                                                                                                                                               |         |          |           |         |  |  |          |          |         |          |           |         |       |  |  |  |  |  |  |     |  |  |  |  |  |  |    |  |  |  |  |  |  |        |  |  |  |  |  |  |
| AC.06a             | What is the size of the solar module [centimetres]                                                      | <input type="text"/> <input type="text"/> <input type="text"/> x <input type="text"/> <input type="text"/> <input type="text"/>                                                                                                                                                                                                                                                                                                                                                                                                                                                                   |         |          |           |         |  |  |          |          |         |          |           |         |       |  |  |  |  |  |  |     |  |  |  |  |  |  |    |  |  |  |  |  |  |        |  |  |  |  |  |  |
| AC. 07a            | What is the power rating of the solar module? [watts peak]                                              | <input type="text"/> <input type="text"/> <input type="text"/>                                                                                                                                                                                                                                                                                                                                                                                                                                                                                                                                    |         |          |           |         |  |  |          |          |         |          |           |         |       |  |  |  |  |  |  |     |  |  |  |  |  |  |    |  |  |  |  |  |  |        |  |  |  |  |  |  |
| AC.08a             | Please identify the device using the photos provided<br>Name: PO                                        | _____                                                                                                                                                                                                                                                                                                                                                                                                                                                                                                                                                                                             |         |          |           |         |  |  |          |          |         |          |           |         |       |  |  |  |  |  |  |     |  |  |  |  |  |  |    |  |  |  |  |  |  |        |  |  |  |  |  |  |
| AC. 09a            | How long do you expect this system to last before it needs repair or replacement?                       | <input type="text"/> <input type="text"/> months                                                                                                                                                                                                                                                                                                                                                                                                                                                                                                                                                  |         |          |           |         |  |  |          |          |         |          |           |         |       |  |  |  |  |  |  |     |  |  |  |  |  |  |    |  |  |  |  |  |  |        |  |  |  |  |  |  |
| AC. 10a            | On average how many hours do you use this system for lighting each day?                                 | <input type="text"/> <input type="text"/> hours                                                                                                                                                                                                                                                                                                                                                                                                                                                                                                                                                   |         |          |           |         |  |  |          |          |         |          |           |         |       |  |  |  |  |  |  |     |  |  |  |  |  |  |    |  |  |  |  |  |  |        |  |  |  |  |  |  |
| AC.10b             | At what times do you use the system most?                                                               | <table border="1" style="width: 100%; border-collapse: collapse; text-align: center;"> <thead> <tr> <th></th> <th>6am-10am</th> <th>10am-2pm</th> <th>2pm-6pm</th> <th>6pm-10pm</th> <th>10pm -2am</th> <th>2am-6am</th> </tr> </thead> <tbody> <tr> <td>Light</td> <td></td><td></td><td></td><td></td><td></td><td></td> </tr> <tr> <td>Fan</td> <td></td><td></td><td></td><td></td><td></td><td></td> </tr> <tr> <td>TV</td> <td></td><td></td><td></td><td></td><td></td><td></td> </tr> <tr> <td>Mobile</td> <td></td><td></td><td></td><td></td><td></td><td></td> </tr> </tbody> </table> |         |          |           |         |  |  | 6am-10am | 10am-2pm | 2pm-6pm | 6pm-10pm | 10pm -2am | 2am-6am | Light |  |  |  |  |  |  | Fan |  |  |  |  |  |  | TV |  |  |  |  |  |  | Mobile |  |  |  |  |  |  |
|                    | 6am-10am                                                                                                | 10am-2pm                                                                                                                                                                                                                                                                                                                                                                                                                                                                                                                                                                                          | 2pm-6pm | 6pm-10pm | 10pm -2am | 2am-6am |  |  |          |          |         |          |           |         |       |  |  |  |  |  |  |     |  |  |  |  |  |  |    |  |  |  |  |  |  |        |  |  |  |  |  |  |
| Light              |                                                                                                         |                                                                                                                                                                                                                                                                                                                                                                                                                                                                                                                                                                                                   |         |          |           |         |  |  |          |          |         |          |           |         |       |  |  |  |  |  |  |     |  |  |  |  |  |  |    |  |  |  |  |  |  |        |  |  |  |  |  |  |
| Fan                |                                                                                                         |                                                                                                                                                                                                                                                                                                                                                                                                                                                                                                                                                                                                   |         |          |           |         |  |  |          |          |         |          |           |         |       |  |  |  |  |  |  |     |  |  |  |  |  |  |    |  |  |  |  |  |  |        |  |  |  |  |  |  |
| TV                 |                                                                                                         |                                                                                                                                                                                                                                                                                                                                                                                                                                                                                                                                                                                                   |         |          |           |         |  |  |          |          |         |          |           |         |       |  |  |  |  |  |  |     |  |  |  |  |  |  |    |  |  |  |  |  |  |        |  |  |  |  |  |  |
| Mobile             |                                                                                                         |                                                                                                                                                                                                                                                                                                                                                                                                                                                                                                                                                                                                   |         |          |           |         |  |  |          |          |         |          |           |         |       |  |  |  |  |  |  |     |  |  |  |  |  |  |    |  |  |  |  |  |  |        |  |  |  |  |  |  |

# Multi-tier Framework Questionnaire: Bangladesh

|                      |                                                                                                                                                                                      | Radio                                                                                                                                                                                                                                                                                                                                                                                                                                                                                                                                                                                                                                                              |         |          |           |  |  |  |  |  |          |          |         |          |           |       |  |  |  |  |  |     |  |  |  |  |  |    |  |  |  |  |  |        |  |  |  |  |  |       |  |  |  |  |  |     |  |  |  |  |  |      |  |  |  |  |  |
|----------------------|--------------------------------------------------------------------------------------------------------------------------------------------------------------------------------------|--------------------------------------------------------------------------------------------------------------------------------------------------------------------------------------------------------------------------------------------------------------------------------------------------------------------------------------------------------------------------------------------------------------------------------------------------------------------------------------------------------------------------------------------------------------------------------------------------------------------------------------------------------------------|---------|----------|-----------|--|--|--|--|--|----------|----------|---------|----------|-----------|-------|--|--|--|--|--|-----|--|--|--|--|--|----|--|--|--|--|--|--------|--|--|--|--|--|-------|--|--|--|--|--|-----|--|--|--|--|--|------|--|--|--|--|--|
|                      |                                                                                                                                                                                      | ...                                                                                                                                                                                                                                                                                                                                                                                                                                                                                                                                                                                                                                                                |         |          |           |  |  |  |  |  |          |          |         |          |           |       |  |  |  |  |  |     |  |  |  |  |  |    |  |  |  |  |  |        |  |  |  |  |  |       |  |  |  |  |  |     |  |  |  |  |  |      |  |  |  |  |  |
|                      |                                                                                                                                                                                      | ....                                                                                                                                                                                                                                                                                                                                                                                                                                                                                                                                                                                                                                                               |         |          |           |  |  |  |  |  |          |          |         |          |           |       |  |  |  |  |  |     |  |  |  |  |  |    |  |  |  |  |  |        |  |  |  |  |  |       |  |  |  |  |  |     |  |  |  |  |  |      |  |  |  |  |  |
| AC. 11a              | How many people can use this device / system at the same time without moving the lamp around for task lighting (e.g. for reading or for cutting vegetables)? / Can all people use it | <input type="checkbox"/> <input type="checkbox"/> yes/ no                                                                                                                                                                                                                                                                                                                                                                                                                                                                                                                                                                                                          |         |          |           |  |  |  |  |  |          |          |         |          |           |       |  |  |  |  |  |     |  |  |  |  |  |    |  |  |  |  |  |        |  |  |  |  |  |       |  |  |  |  |  |     |  |  |  |  |  |      |  |  |  |  |  |
| AC. 12a              | Are you able to power mobile phones or other loads with this device?                                                                                                                 | <input type="checkbox"/> 1. Yes<br><input type="checkbox"/> 2. No                                                                                                                                                                                                                                                                                                                                                                                                                                                                                                                                                                                                  |         |          |           |  |  |  |  |  |          |          |         |          |           |       |  |  |  |  |  |     |  |  |  |  |  |    |  |  |  |  |  |        |  |  |  |  |  |       |  |  |  |  |  |     |  |  |  |  |  |      |  |  |  |  |  |
| SECONDARY SYSTEM (B) |                                                                                                                                                                                      |                                                                                                                                                                                                                                                                                                                                                                                                                                                                                                                                                                                                                                                                    |         |          |           |  |  |  |  |  |          |          |         |          |           |       |  |  |  |  |  |     |  |  |  |  |  |    |  |  |  |  |  |        |  |  |  |  |  |       |  |  |  |  |  |     |  |  |  |  |  |      |  |  |  |  |  |
| AC.02b               | In this device, are the solar panel and the storage battery together or separate (connected by a wire)?                                                                              | <input type="checkbox"/> 1. Together, in a single casing<br><input type="checkbox"/> 2. Separate, connected by a wire<br><input type="checkbox"/> 3. There is no storage battery                                                                                                                                                                                                                                                                                                                                                                                                                                                                                   |         |          |           |  |  |  |  |  |          |          |         |          |           |       |  |  |  |  |  |     |  |  |  |  |  |    |  |  |  |  |  |        |  |  |  |  |  |       |  |  |  |  |  |     |  |  |  |  |  |      |  |  |  |  |  |
| AC. 03b              | In this device, are the battery and the bulb together or separate?                                                                                                                   | <input type="checkbox"/> 1. At least one light bulb is separated from the battery by a wire<br><input type="checkbox"/> 2. Light bulbs are together with the battery<br><input type="checkbox"/> 3. This system or device does not power any lights<br><input type="checkbox"/> 4. There is no storage battery                                                                                                                                                                                                                                                                                                                                                     |         |          |           |  |  |  |  |  |          |          |         |          |           |       |  |  |  |  |  |     |  |  |  |  |  |    |  |  |  |  |  |        |  |  |  |  |  |       |  |  |  |  |  |     |  |  |  |  |  |      |  |  |  |  |  |
| AC.04b               | In this device, how many light bulbs do you have?                                                                                                                                    | <input type="checkbox"/> 1. One light bulb<br><input type="checkbox"/> 2. Two light bulbs (that can be separated from each other)<br><input type="checkbox"/> 3. Three or more light bulbs (that can be separated from each other)<br><input type="checkbox"/> 4. Zero – this system or device does not power lights                                                                                                                                                                                                                                                                                                                                               |         |          |           |  |  |  |  |  |          |          |         |          |           |       |  |  |  |  |  |     |  |  |  |  |  |    |  |  |  |  |  |        |  |  |  |  |  |       |  |  |  |  |  |     |  |  |  |  |  |      |  |  |  |  |  |
| AC. 05b              | What type of light bulbs do you use?                                                                                                                                                 | <input type="checkbox"/> 1. LED<br><input type="checkbox"/> 2. CFL<br><input type="checkbox"/> 3. Incandescent<br><input type="checkbox"/> 4. Other (Specify) _____                                                                                                                                                                                                                                                                                                                                                                                                                                                                                                |         |          |           |  |  |  |  |  |          |          |         |          |           |       |  |  |  |  |  |     |  |  |  |  |  |    |  |  |  |  |  |        |  |  |  |  |  |       |  |  |  |  |  |     |  |  |  |  |  |      |  |  |  |  |  |
| AC.06b               | What is the size of the solar module [centimetres]                                                                                                                                   | <input type="text"/> x <input type="text"/>                                                                                                                                                                                                                                                                                                                                                                                                                                                                                                                                                                                                                        |         |          |           |  |  |  |  |  |          |          |         |          |           |       |  |  |  |  |  |     |  |  |  |  |  |    |  |  |  |  |  |        |  |  |  |  |  |       |  |  |  |  |  |     |  |  |  |  |  |      |  |  |  |  |  |
| AC. 07b              | What is the power rating of the solar module? [watts peak]                                                                                                                           | <input type="text"/>                                                                                                                                                                                                                                                                                                                                                                                                                                                                                                                                                                                                                                               |         |          |           |  |  |  |  |  |          |          |         |          |           |       |  |  |  |  |  |     |  |  |  |  |  |    |  |  |  |  |  |        |  |  |  |  |  |       |  |  |  |  |  |     |  |  |  |  |  |      |  |  |  |  |  |
| AC.08b               | Please name the brand of the system                                                                                                                                                  | -----<br><br><input type="checkbox"/> Not identifiable                                                                                                                                                                                                                                                                                                                                                                                                                                                                                                                                                                                                             |         |          |           |  |  |  |  |  |          |          |         |          |           |       |  |  |  |  |  |     |  |  |  |  |  |    |  |  |  |  |  |        |  |  |  |  |  |       |  |  |  |  |  |     |  |  |  |  |  |      |  |  |  |  |  |
| AC. 09b              | How long do you expect this system to last before it needs repair or replacement?                                                                                                    | <input type="text"/> <input type="text"/> months                                                                                                                                                                                                                                                                                                                                                                                                                                                                                                                                                                                                                   |         |          |           |  |  |  |  |  |          |          |         |          |           |       |  |  |  |  |  |     |  |  |  |  |  |    |  |  |  |  |  |        |  |  |  |  |  |       |  |  |  |  |  |     |  |  |  |  |  |      |  |  |  |  |  |
| AC. 10c              | How many hours do you use this system for lighting each day?                                                                                                                         | <input type="text"/> <input type="text"/> hours                                                                                                                                                                                                                                                                                                                                                                                                                                                                                                                                                                                                                    |         |          |           |  |  |  |  |  |          |          |         |          |           |       |  |  |  |  |  |     |  |  |  |  |  |    |  |  |  |  |  |        |  |  |  |  |  |       |  |  |  |  |  |     |  |  |  |  |  |      |  |  |  |  |  |
| AC.10d               | At what times do you use the system most?                                                                                                                                            | <table border="1"> <thead> <tr> <th></th><th>6am-10am</th><th>10am-2pm</th><th>2pm-6pm</th><th>6pm-10pm</th><th>10pm -2am</th></tr> </thead> <tbody> <tr><td>Light</td><td></td><td></td><td></td><td></td><td></td></tr> <tr><td>Fan</td><td></td><td></td><td></td><td></td><td></td></tr> <tr><td>TV</td><td></td><td></td><td></td><td></td><td></td></tr> <tr><td>Mobile</td><td></td><td></td><td></td><td></td><td></td></tr> <tr><td>Radio</td><td></td><td></td><td></td><td></td><td></td></tr> <tr><td>...</td><td></td><td></td><td></td><td></td><td></td></tr> <tr><td>....</td><td></td><td></td><td></td><td></td><td></td></tr> </tbody> </table> |         |          |           |  |  |  |  |  | 6am-10am | 10am-2pm | 2pm-6pm | 6pm-10pm | 10pm -2am | Light |  |  |  |  |  | Fan |  |  |  |  |  | TV |  |  |  |  |  | Mobile |  |  |  |  |  | Radio |  |  |  |  |  | ... |  |  |  |  |  | .... |  |  |  |  |  |
|                      | 6am-10am                                                                                                                                                                             | 10am-2pm                                                                                                                                                                                                                                                                                                                                                                                                                                                                                                                                                                                                                                                           | 2pm-6pm | 6pm-10pm | 10pm -2am |  |  |  |  |  |          |          |         |          |           |       |  |  |  |  |  |     |  |  |  |  |  |    |  |  |  |  |  |        |  |  |  |  |  |       |  |  |  |  |  |     |  |  |  |  |  |      |  |  |  |  |  |
| Light                |                                                                                                                                                                                      |                                                                                                                                                                                                                                                                                                                                                                                                                                                                                                                                                                                                                                                                    |         |          |           |  |  |  |  |  |          |          |         |          |           |       |  |  |  |  |  |     |  |  |  |  |  |    |  |  |  |  |  |        |  |  |  |  |  |       |  |  |  |  |  |     |  |  |  |  |  |      |  |  |  |  |  |
| Fan                  |                                                                                                                                                                                      |                                                                                                                                                                                                                                                                                                                                                                                                                                                                                                                                                                                                                                                                    |         |          |           |  |  |  |  |  |          |          |         |          |           |       |  |  |  |  |  |     |  |  |  |  |  |    |  |  |  |  |  |        |  |  |  |  |  |       |  |  |  |  |  |     |  |  |  |  |  |      |  |  |  |  |  |
| TV                   |                                                                                                                                                                                      |                                                                                                                                                                                                                                                                                                                                                                                                                                                                                                                                                                                                                                                                    |         |          |           |  |  |  |  |  |          |          |         |          |           |       |  |  |  |  |  |     |  |  |  |  |  |    |  |  |  |  |  |        |  |  |  |  |  |       |  |  |  |  |  |     |  |  |  |  |  |      |  |  |  |  |  |
| Mobile               |                                                                                                                                                                                      |                                                                                                                                                                                                                                                                                                                                                                                                                                                                                                                                                                                                                                                                    |         |          |           |  |  |  |  |  |          |          |         |          |           |       |  |  |  |  |  |     |  |  |  |  |  |    |  |  |  |  |  |        |  |  |  |  |  |       |  |  |  |  |  |     |  |  |  |  |  |      |  |  |  |  |  |
| Radio                |                                                                                                                                                                                      |                                                                                                                                                                                                                                                                                                                                                                                                                                                                                                                                                                                                                                                                    |         |          |           |  |  |  |  |  |          |          |         |          |           |       |  |  |  |  |  |     |  |  |  |  |  |    |  |  |  |  |  |        |  |  |  |  |  |       |  |  |  |  |  |     |  |  |  |  |  |      |  |  |  |  |  |
| ...                  |                                                                                                                                                                                      |                                                                                                                                                                                                                                                                                                                                                                                                                                                                                                                                                                                                                                                                    |         |          |           |  |  |  |  |  |          |          |         |          |           |       |  |  |  |  |  |     |  |  |  |  |  |    |  |  |  |  |  |        |  |  |  |  |  |       |  |  |  |  |  |     |  |  |  |  |  |      |  |  |  |  |  |
| ....                 |                                                                                                                                                                                      |                                                                                                                                                                                                                                                                                                                                                                                                                                                                                                                                                                                                                                                                    |         |          |           |  |  |  |  |  |          |          |         |          |           |       |  |  |  |  |  |     |  |  |  |  |  |    |  |  |  |  |  |        |  |  |  |  |  |       |  |  |  |  |  |     |  |  |  |  |  |      |  |  |  |  |  |

## Multi-tier Framework Questionnaire: Bangladesh

|         |                                                                                                                                                              |                                                                   |
|---------|--------------------------------------------------------------------------------------------------------------------------------------------------------------|-------------------------------------------------------------------|
| AC. 11b | How many people can use this device / system at the same time without moving the lamp around for task lighting (e.g. for reading or for cutting vegetables)? | <input type="text"/> <input type="text"/>                         |
| AC. 12b | Are you able to power mobile phones or other loads?                                                                                                          | <input type="checkbox"/> 1. Yes<br><input type="checkbox"/> 2. No |

### Questions for all respondents

|        |                                                                               |                                                                   |
|--------|-------------------------------------------------------------------------------|-------------------------------------------------------------------|
| AC. 13 | Are you able to recharge mobile phones within 500m from your house?           | <input type="checkbox"/> 1. Yes<br><input type="checkbox"/> 2. No |
| AC. 14 | How many times per month do you recharge mobile phones outside the household? | <input type="text"/> <input type="text"/>                         |
| AC. 15 | How much does a recharge cost?                                                | <input type="text"/> <input type="text"/> {Tk.}                   |

### Questions for RSF customers only

|        |                                                                                               |                                                                                                                                                                        |
|--------|-----------------------------------------------------------------------------------------------|------------------------------------------------------------------------------------------------------------------------------------------------------------------------|
| AC. 16 | How many times have you faced a technical problem with the system within in the last 3months? | <input type="text"/> <input type="text"/> times                                                                                                                        |
| AC. 17 | If yes, how long did it take until RSF people were there to fix?                              | <input type="text"/> <input type="text"/> days                                                                                                                         |
| AC. 18 | Did they manage to f ix the problem?                                                          | <input type="checkbox"/> 1. Yes<br><input type="checkbox"/> 2. No. What happened? -----                                                                                |
| AC.19  | How often do you receive visits from RSF staff per month?                                     | <input type="text"/> <input type="text"/> times                                                                                                                        |
| AC.20  | Are these visits only for collection or also for fixing?                                      | <input type="checkbox"/> 1. Yes, only for collection<br><input type="checkbox"/> 2. No, also for fixing, how many in the last three months? <input type="text"/> times |
| AC.21  | Did you miss any payments in the last three month?                                            | <input type="checkbox"/> 1. Yes, why? -----<br><input type="checkbox"/> 2. No                                                                                          |

### Multi-tier Framework Questionnaire: Bangladesh

|       |                                                                                          |                                                                                                                                                                                         |
|-------|------------------------------------------------------------------------------------------|-----------------------------------------------------------------------------------------------------------------------------------------------------------------------------------------|
| AC.22 | What is your level of satisfaction of the system? (1 being very low; 6 being very high)  | <div>1 2 3 4 5 6</div> <div><input type="checkbox"/> <input type="checkbox"/> <input type="checkbox"/> <input type="checkbox"/> <input type="checkbox"/> <input type="checkbox"/></div> |
| AC.23 | What is your level of satisfaction of the service? (1 being very low; 6 being very high) | <div>1 2 3 4 5 6</div> <div><input type="checkbox"/> <input type="checkbox"/> <input type="checkbox"/> <input type="checkbox"/> <input type="checkbox"/> <input type="checkbox"/></div> |
| AC.24 | Is there anything you would like to change in the current payment model?                 | <div><input type="checkbox"/> 1. Yes, what? -----</div> <div><input type="checkbox"/> 2. No</div>                                                                                       |
| AC.25 | Is there anything you would like to change in the current service model?                 | <div><input type="checkbox"/> 1. Yes, what? -----</div> <div><input type="checkbox"/> 2. No</div>                                                                                       |
| AC.26 | When was the system installed?                                                           | <div>d d m m y y</div> <div><input type="checkbox"/> <input type="checkbox"/> <input type="checkbox"/> <input type="checkbox"/> <input type="checkbox"/> <input type="checkbox"/></div> |



## Multi-tier Framework Questionnaire: Bangladesh

### MODULE D: PRODUCTIVE USE OF ENERGY

NOTE: Please select members of household who replies YES to question 0.9

**Only** business owners and self-employed/freelancers working within the targeted area will be considered.

| D.01 | D.02                                                                                                                            | D.03                                                                                                                                                                                                                                                                                                                                                                                                                    | D.04                                                                                                                                                                                                                                                               | D.05                                                                                                                                                                                             | D.06                                      | D.07                            |
|------|---------------------------------------------------------------------------------------------------------------------------------|-------------------------------------------------------------------------------------------------------------------------------------------------------------------------------------------------------------------------------------------------------------------------------------------------------------------------------------------------------------------------------------------------------------------------|--------------------------------------------------------------------------------------------------------------------------------------------------------------------------------------------------------------------------------------------------------------------|--------------------------------------------------------------------------------------------------------------------------------------------------------------------------------------------------|-------------------------------------------|---------------------------------|
| CODE | Who in the household manages a business or an enterprise?<br><br>LIST UP TO 2 FROM HOUSEHOLD ROSTER<br><br>(roster HH code 0.2) | What is the nature of the business activity that you own?<br><br>1. FARMER (SPECIFY CROPS)<br>2. LIVESTOCK/POULTRY<br>3. FISHERY<br>4. TRANSPORT/DRIVER<br>5. CONSTRUCTION<br>6. HOUSE REPAIR /CARPENTRY<br>7. MECHANIC<br>8. DOMESTIC HELP/ MAID<br>9. TAILORING/SEWING<br>10. POTTERY<br>11. BLACKSMITH<br>12. TRADE/ RETAIL SHOP (SPECIFY)<br>13. PHYSICIAN/ HEALER<br>14. HAIRDRESSER/BARBER<br>15. OTHERS/ SPECIFY | Where do you operate this [ENTERPRISE]?<br><br>READ RESPONSES<br><br>1. HOME (INSIDE RESIDENCE)<br>2. HOME (OUTSIDE RESIDENCE)<br>3. INDUSTRIAL SITE<br>4. TRADITIONAL MARKET PLACE<br>5. COMMERCIAL AREA SHOP<br>6. ROADSIDE<br>7. OTHER FIXED PLACE<br>8. MOBILE | Do you run this business alone or you have partners?<br><br>READ RESPONSES<br><br>1. ALONE/ no partner<br>2. ONE PARTNER –shared profit<br>3. TWO PARTNERS- shared profits<br>4. OTHER (SPECIFY) | On average, how long is your working day? | How many employees do you have? |
| 1    |                                                                                                                                 |                                                                                                                                                                                                                                                                                                                                                                                                                         |                                                                                                                                                                                                                                                                    |                                                                                                                                                                                                  |                                           |                                 |
| 2    |                                                                                                                                 |                                                                                                                                                                                                                                                                                                                                                                                                                         |                                                                                                                                                                                                                                                                    |                                                                                                                                                                                                  |                                           |                                 |
| 3    |                                                                                                                                 |                                                                                                                                                                                                                                                                                                                                                                                                                         |                                                                                                                                                                                                                                                                    |                                                                                                                                                                                                  |                                           |                                 |
| 4    |                                                                                                                                 |                                                                                                                                                                                                                                                                                                                                                                                                                         |                                                                                                                                                                                                                                                                    |                                                                                                                                                                                                  |                                           |                                 |
| 5    |                                                                                                                                 |                                                                                                                                                                                                                                                                                                                                                                                                                         |                                                                                                                                                                                                                                                                    |                                                                                                                                                                                                  |                                           |                                 |

## Multi-tier Framework Questionnaire: Bangladesh

|               |                                                                                                                                                                                                                                                                                         | Lighting*                                                                                                                   | ICT & Entertainment*                                                                                            | Motive power*                                               | Cooling                                                     | Product heating*                                            | Water heating*                                              |                                                             |
|---------------|-----------------------------------------------------------------------------------------------------------------------------------------------------------------------------------------------------------------------------------------------------------------------------------------|-----------------------------------------------------------------------------------------------------------------------------|-----------------------------------------------------------------------------------------------------------------|-------------------------------------------------------------|-------------------------------------------------------------|-------------------------------------------------------------|-------------------------------------------------------------|-------------------------------------------------------------|
| Relevance     | 8. Please indicate which of the following application you <b>consider strictly necessary</b> to enable you to undertake your productive activity?                                                                                                                                       | 1. Yes<br>2. No                                                                                                             | 1. Yes<br>2. No                                                                                                 | 1. Yes<br>2. No                                             | 1. Yes<br>2. No                                             | 1. Yes<br>2. No                                             | 1. Yes<br>2. No                                             |                                                             |
|               | 9. Would the lack of this application significantly make your business suffer in one of the following aspects:                                                                                                                                                                          | 1. Productivity<br>2. Sales<br>3. Costs<br>4. Quality                                                                       | 1. Productivity<br>2. Sales<br>3. Costs<br>4. Quality                                                           | 1. Productivity<br>2. Sales<br>3. Costs<br>4. Quality       | 1. Productivity<br>2. Sales<br>3. Costs<br>4. Quality       | 1. Productivity<br>2. Sales<br>3. Costs<br>4. Quality       | 1. Productivity<br>2. Sales<br>3. Costs<br>4. Quality       |                                                             |
| Applications  | 10. Please indicate if you <b>regularly use</b> each of the following applications in your productive activity? <sup>3</sup>                                                                                                                                                            | 1. Yes<br>2. No                                                                                                             | 1. Yes<br>2. No                                                                                                 | 1. Yes<br>2. No                                             | 1. Yes<br>2. No                                             | 1. Yes<br>2. No                                             | 1. Yes<br>2. No                                             |                                                             |
|               | 10a. For those you do use regularly, at what time do you use them most?                                                                                                                                                                                                                 | 10am-2pm<br><input type="checkbox"/>                                                                                        | 2pm-6pm<br><input type="checkbox"/>                                                                             | 6pm-10pm<br><input type="checkbox"/>                        | 10pm-2am<br><input type="checkbox"/>                        | 2am-6am<br><input type="checkbox"/>                         | 6am-10am<br><input type="checkbox"/>                        |                                                             |
|               | 11. If you indicated an application that you consider strictly necessary for your productive activity but which you do not use regularly, (7 is Yes and to 9 is No), please indicate <b>which is the most important reason why you do not use the application. (Select from Code A)</b> |                                                                                                                             |                                                                                                                 |                                                             |                                                             |                                                             |                                                             |                                                             |
| Energy Source | 12. What is the <b>primary energy source</b> being used for this application? (Select from code B)                                                                                                                                                                                      |                                                                                                                             |                                                                                                                 |                                                             |                                                             |                                                             |                                                             |                                                             |
|               | 13. <u>If non-BLEN<sup>4</sup> fuel</u> : Is your primary equipment of fuel combustion (e.g. stove) for this application?                                                                                                                                                               | 1. Self-made<br>2. Manufactured                                                                                             | 1. Self-made<br>2. Manufactured                                                                                 | 1. Self-made<br>2. Manufactured                             | 1. Self-made<br>2. Manufactured                             | 1. Self-made<br>2. Manufactured                             | 1. Self-made<br>2. Manufactured                             |                                                             |
|               | 14. <u>If non-BLEN fuel</u> : Do you use a smoke extraction device? (e.g. chimney, hood)                                                                                                                                                                                                | 1. Yes<br>2. No                                                                                                             | 1. Yes<br>2. No                                                                                                 | 1. Yes<br>2. No                                             | 1. Yes<br>2. No                                             | 1. Yes<br>2. No                                             | 1. Yes<br>2. No                                             |                                                             |
| Seasonality   | 15. In the last 3 months, does the availability of your primary source of electricity vary across seasons?                                                                                                                                                                              | 1. Yes<br>2. No                                                                                                             | 1. Yes<br>2. No                                                                                                 | 1. Yes<br>2. No                                             | 1. Yes<br>2. No                                             | 1. Yes<br>2. No                                             | 1. Yes<br>2. No                                             |                                                             |
|               | 16. If yes, which is the most difficult season for electricity supply in your household? Please respond to all the next questions considering the worst season of the year                                                                                                              | I. Monsoon<br>II. Non-Monsoon                                                                                               |                                                                                                                 |                                                             |                                                             |                                                             |                                                             |                                                             |
| Capacity      | <b>Report the capacity of the system in WATT : read the value from the name plate of the electricity supply equipment. If not available read question 16.</b>                                                                                                                           |                                                                                                                             | _____ W or<br>_____ Wh                                                                                          | _____ W or<br>_____ Wh                                      | _____ W or<br>_____ Wh                                      | _____ W or<br>_____ Wh                                      | _____ W or<br>_____ Wh                                      |                                                             |
|               | Electricity                                                                                                                                                                                                                                                                             | 17. What is the capacity (in watts or watt hours <sup>5</sup> ) of your primary source of electricity for this application? | _____ W or<br>_____ Wh                                                                                          | _____ W or<br>_____ Wh                                      | _____ W or<br>_____ Wh                                      | _____ W or<br>_____ Wh                                      | _____ W or<br>_____ Wh                                      | _____ W or<br>_____ Wh                                      |
|               |                                                                                                                                                                                                                                                                                         | 18. Which of the following electrical appliances (see Code D) do you run with the primary energy source?                    |                                                                                                                 |                                                             |                                                             |                                                             |                                                             |                                                             |
|               | Electricity or RM&T or A&H                                                                                                                                                                                                                                                              | 19. Does the capacity of the primary energy source cover your needs for this application?                                   | 1. Totally <sup>6</sup><br>2. Largely <sup>7</sup><br>3. Partially <sup>8</sup><br>4. No or little <sup>9</sup> | 1. Totally<br>2. Largely<br>3. Partially<br>4. No or little |

<sup>3</sup> If answer is NO only ask question 8 and then the questionnaire is over for this application.

<sup>4</sup> Non-BLEN refers to kerosene, biomass, biofuels, diesel, gasoline and other petroleum products (BLEN stands for Biogas, LPG, Electricity and Natural Gas)

<sup>5</sup> For grid, mini-grid and fuel-based electricity generators (fossil fuel, biofuels, biogas), capacity is measured in watts. For all other off-grid systems, capacity is measured in watt hours.

<sup>6</sup> Totally means 100% of the needs are covered

<sup>7</sup> Largely means between 75% and 100% of the needs are covered

<sup>8</sup> Partially means between 25% and 75% of the needs are covered

## Multi-tier Framework Questionnaire: Bangladesh

|                           |                                  |                                                                                                                                                                                                                                                |                                                                                                                |                                                                                                                |                                                                                                             |                                                                                                             |                                                                                                             |                                                                                                             |
|---------------------------|----------------------------------|------------------------------------------------------------------------------------------------------------------------------------------------------------------------------------------------------------------------------------------------|----------------------------------------------------------------------------------------------------------------|----------------------------------------------------------------------------------------------------------------|-------------------------------------------------------------------------------------------------------------|-------------------------------------------------------------------------------------------------------------|-------------------------------------------------------------------------------------------------------------|-------------------------------------------------------------------------------------------------------------|
| Duration/<br>Availability | Electricity<br>or RM&T<br>or A&H | 20. [During the worst season/in the last 3 months] , out t of the average number of hours you are working each day, how many hours is the primary energy source available for running the following application (should you decide to use it)? | <input type="text"/> <input type="text"/><br>[hours]                                                           | <input type="text"/> <input type="text"/><br>[hours]                                                           | <input type="text"/> <input type="text"/> [hours]                                                           |
|                           | Fuel                             | 21. [During the worst season/in the last 3 months] What percentage of you needs are you able to cover with the average quantity of fuel available for running the following application? To be rephrased?                                      | 1. <25%<br>2. 25%-50%<br>3. 50%-75%<br>4. 75%-100%<br>5. 100%+ <sup>10</sup>                                   | 1. <25%<br>2. 25%-50%<br>3. 50%-75%<br>4. 75%-100%<br>5. 100%+                                                 | 1. <25%<br>2. 25%-50%<br>3. 50%-75%<br>4. 75%-100%<br>5. 100%+                                              | 1. <25%<br>2. 25%-50%<br>3. 50%-75%<br>4. 75%-100%<br>5. 100%+                                              | 1. <25%<br>2. 25%-50%<br>3. 50%-75%<br>4. 75%-100%<br>5. 100%+                                              | 1. <25%<br>2. 25%-50%<br>3. 50%-75%<br>4. 75%-100%<br>5. 100%+                                              |
|                           |                                  | 22. [During the worst season/in the last 3 months] On average, how many times do you face unpredictable interruptions of your primary source of electricity per week? (Add a definition of interruption)                                       | <input type="text"/> <input type="text"/><br>interruptions                                                     | <input type="text"/> <input type="text"/><br>interruptions                                                     | <input type="text"/> <input type="text"/><br>interruptions                                                  | <input type="text"/> <input type="text"/><br>interruptions                                                  | <input type="text"/> <input type="text"/><br>interruptions                                                  | <input type="text"/> <input type="text"/><br>interruptions                                                  |
|                           |                                  | 23. [During the worst season/in the last 3 months] On average, how long is <b>each</b> unpredictable interruption of your primary source of electricity?                                                                                       | <input type="text"/> <input type="text"/><br>[hours]<br><input type="text"/> <input type="text"/><br>[minutes] | <input type="text"/> <input type="text"/><br>[hours]<br><input type="text"/> <input type="text"/><br>[minutes] | <input type="text"/> <input type="text"/> [hours]<br><input type="text"/> <input type="text"/><br>[minutes] | <input type="text"/> <input type="text"/> [hours]<br><input type="text"/> <input type="text"/><br>[minutes] | <input type="text"/> <input type="text"/> [hours]<br><input type="text"/> <input type="text"/><br>[minutes] | <input type="text"/> <input type="text"/> [hours]<br><input type="text"/> <input type="text"/><br>[minutes] |
|                           |                                  | 24. How do unscheduled interruptions to energy access for this application impact your business operations <sup>11</sup> ?                                                                                                                     | 1. A little or not<br>2. Moderately<br>3. Severely                                                             | 1. A little or not<br>2. Moderately<br>3. Severely                                                             | 1. A little or not<br>2. Moderately<br>3. Severely                                                          | 1. A little or not<br>2. Moderately<br>3. Severely                                                          | 1. A little or not<br>2. Moderately<br>3. Severely                                                          | 1. A little or not<br>2. Moderately<br>3. Severely                                                          |
| Quality                   | Electricity                      | 25. [During the worst season/in the last 3 months] have you experienced situations in which appliances cannot be used or may get damaged because of low voltage or voltage fluctuations from the primary source?                               | 1. Yes<br>2. No                                                                                                | 1. Yes<br>2. No                                                                                                | 1. Yes<br>2. No                                                                                             | 1. Yes<br>2. No                                                                                             | 1. Yes<br>2. No                                                                                             | 1. Yes<br>2. No                                                                                             |
|                           | Fuel                             | 26. [During the worst season/in the last 3 months] did you face problems of adulteration or fluctuating calorific value of the fuel resulting in poor combustion <sup>12</sup> or slower RPM? Simplify language                                | 1. Yes<br>2. No                                                                                                | 1. Yes<br>2. No                                                                                                | 1. Yes<br>2. No                                                                                             | 1. Yes<br>2. No                                                                                             | 1. Yes<br>2. No                                                                                             | 1. Yes<br>2. No                                                                                             |
|                           | RME<br>or A&H                    | 27. [During the worst season/in the last 3 months] did you face problems of low or fluctuating RPM (e.g. due to variable wind speed or water flow) or speed? Simplify language                                                                 | 1. Yes<br>2. No                                                                                                | 1. Yes<br>2. No                                                                                                | 1. Yes<br>2. No                                                                                             | 1. Yes<br>2. No                                                                                             | 1. Yes<br>2. No                                                                                             | 1. Yes<br>2. No                                                                                             |
|                           | RTE                              | 28. [During the worst season/in the last 3 months] did you face problems of low or fluctuating heat or temperature? <b>In each attribute? Needs explanation</b>                                                                                | 1. Yes<br>2. No                                                                                                | 1. Yes<br>2. No                                                                                                | 1. Yes<br>2. No                                                                                             | 1. Yes<br>2. No                                                                                             | 1. Yes<br>2. No                                                                                             | 1. Yes<br>2. No                                                                                             |
|                           |                                  | 29. How does inadequate quality of energy supply impact your business operations or to what extent has it damaged any equipment for each of the applications you use <sup>13</sup> ?                                                           | 1. A little or not<br>2. Moderately<br>3. Severely                                                             | 1. A little or not<br>2. Moderately<br>3. Severely                                                             | 1. A little or not<br>2. Moderately<br>3. Severely                                                          | 1. A little or not<br>2. Moderately<br>3. Severely                                                          | 1. A little or not<br>2. Moderately<br>3. Severely                                                          | 1. A little or not<br>2. Moderately<br>3. Severely                                                          |

<sup>9</sup> No or little means that less than 25% of the needs are covered

<sup>10</sup> 100% of the needs are covered and there are no constraints in extending operating hours

<sup>11</sup> The definition of the impact level (little or not; moderately; severely) is left to the respondent's perception within the context of his/her business and experience.

<sup>12</sup> Poor combustion may be the result of wet biomass, or adulterated fuel, resulting in weak flame, excessive black smoke, etc.

<sup>13</sup> The definition of the impact level (little or not; moderately; severely) is left to the respondent's perception within the context of his/her business and experience.

## Multi-tier Framework Questionnaire: Bangladesh

|                          |                                                                                                                                                                                             |                                                                                                                                                                                                                                  |                                                                                              |                                                                  |                                                                  |                                                                  |                                                                  |                                                                  |
|--------------------------|---------------------------------------------------------------------------------------------------------------------------------------------------------------------------------------------|----------------------------------------------------------------------------------------------------------------------------------------------------------------------------------------------------------------------------------|----------------------------------------------------------------------------------------------|------------------------------------------------------------------|------------------------------------------------------------------|------------------------------------------------------------------|------------------------------------------------------------------|------------------------------------------------------------------|
| <b>Health and Safety</b> | 30. [During the worst season/in the last 3 months] has your primary energy source for this application caused any health issue (i.e. Electrocuting; smoke/fumes; Burns; Fire; Injuries etc. |                                                                                                                                                                                                                                  | 1. Yes<br>2. No → <b>D.32</b>                                                                | 1. Yes<br>2. No → <b>D.32</b>                                    | 1. Yes<br>2. No → <b>D.32</b>                                    | 1. Yes<br>2. No → <b>D.32</b>                                    | 1. Yes<br>2. No → <b>D.32</b>                                    | 1. Yes<br>2. No → <b>D.32</b>                                    |
|                          | 31. IF YES, what level of damage has caused?                                                                                                                                                |                                                                                                                                                                                                                                  | 1. Severe damage <sup>14</sup><br>2. Moderate damage <sup>15</sup><br>3. No or little damage | 1. Severe damage<br>2. Moderate damage<br>3. No or little damage | 1. Severe damage<br>2. Moderate damage<br>3. No or little damage | 1. Severe damage<br>2. Moderate damage<br>3. No or little damage | 1. Severe damage<br>2. Moderate damage<br>3. No or little damage | 1. Severe damage<br>2. Moderate damage<br>3. No or little damage |
|                          | 32. Does your primary energy source for this application likely to cause any health issue (i.e. Electrocuting; smoke/fumes; Burns; Fire; Injuries etc.                                      |                                                                                                                                                                                                                                  | 1. Yes<br>2. No → <b>D.34</b>                                                                | 1. Yes<br>2. No → <b>D.34</b>                                    | 1. Yes<br>2. No → <b>D.34</b>                                    | 1. Yes<br>2. No → <b>D.34</b>                                    | 1. Yes<br>2. No → <b>D.34</b>                                    | 1. Yes<br>2. No → <b>D.34</b>                                    |
|                          | 33. IF YES, what level of damage is likely to cause?                                                                                                                                        |                                                                                                                                                                                                                                  | 1. Severe damage <sup>16</sup><br>2. Moderate damage <sup>17</sup><br>3. No or little damage | 1. Severe damage<br>2. Moderate damage<br>3. No or little damage | 1. Severe damage<br>2. Moderate damage<br>3. No or little damage | 1. Severe damage<br>2. Moderate damage<br>3. No or little damage | 1. Severe damage<br>2. Moderate damage<br>3. No or little damage | 1. Severe damage<br>2. Moderate damage<br>3. No or little damage |
| <b>Legality</b>          | <b>Electricity</b>                                                                                                                                                                          | 34. Who do you pay for your primary electricity supply? (Select from code C)                                                                                                                                                     |                                                                                              |                                                                  |                                                                  |                                                                  |                                                                  |                                                                  |
|                          |                                                                                                                                                                                             | 35. Does your household have a meter for the primary source of electricity?                                                                                                                                                      | 1. Yes<br>2. No                                                                              | 1. Yes<br>2. No                                                  | 1. Yes<br>2. No                                                  | 1. Yes<br>2. No                                                  | 1. Yes<br>2. No                                                  | 1. Yes<br>2. No                                                  |
| <b>Affordability</b>     | <b>Electricity</b>                                                                                                                                                                          | a. <b>If metered connection</b> (grid or mini-grid): [During the worst season/in the last 3 months] what is the price per kWh that you pay?                                                                                      | _____ Tk.                                                                                    |                                                                  |                                                                  |                                                                  |                                                                  |                                                                  |
|                          |                                                                                                                                                                                             | b. [This price excludes any fixed fees, connection fees, etc.]                                                                                                                                                                   |                                                                                              |                                                                  |                                                                  |                                                                  |                                                                  |                                                                  |
|                          |                                                                                                                                                                                             | c. <b>If flat rate</b> <sup>18</sup> (grid, mini-grid or solar stand-alone system): [During the worst season/in the last 3 months] what is the monthly flat rate that you pay in the last 3 months?                              | _____ Tk.                                                                                    |                                                                  |                                                                  |                                                                  |                                                                  |                                                                  |
|                          |                                                                                                                                                                                             | d. <b>If rechargeable battery</b> <sup>19</sup> : [During the worst season/in the last 3 months] how much does it cost to recharge one of your batteries each time?                                                              | _____ Tk.                                                                                    |                                                                  |                                                                  |                                                                  |                                                                  |                                                                  |
|                          |                                                                                                                                                                                             | e. <b>If fuel based generator</b> <sup>20</sup> : [During the worst season/in the last 3 months] what is the average price per litre or kg or m <sup>3</sup> that you pay for fuel to power your generator in the last 3 months? | _____ Tk.                                                                                    |                                                                  |                                                                  |                                                                  |                                                                  |                                                                  |

<sup>14</sup> Severe damage means death or permanent limb/organ failure or incapacity for > 1 week.

<sup>15</sup> Moderate damage means damage (short of death, permanent limb/organ failure or incapacity for > 1 week) which requires medical treatment or time off work or is likely to cause a reduction in lifespan.

<sup>16</sup> Severe damage means death or permanent limb/organ failure or incapacity for > 1 week.

<sup>17</sup> Moderate damage means damage (short of death, permanent limb/organ failure or incapacity for > 1 week) which requires medical treatment or time off work or is likely to cause a reduction in lifespan.

<sup>18</sup> To obtain the price per kWh, the flat rate will be divided by the capacity (information obtained through question 11 or estimated based on information gathered from the mini-grid operator).

<sup>19</sup> To obtain the price per kWh, recharging cost will be divided by the capacity of a rechargeable battery (information obtained through question 11 or estimated).

<sup>20</sup> To obtain the price per kWh, the price per litre is multiplied by the number of liters needed by kWh (e.g. for diesel it is estimated at 3 litres/kWh).

## Multi-tier Framework Questionnaire: Bangladesh

|  |                             |                                                                                                                                                                                                                                                                    |                                                                                                                                                      |                                                                                                                                                      |                                                                                                                                           |                                                                                                                                           |                                                                                                                                           |                                                                                                                                           |  |
|--|-----------------------------|--------------------------------------------------------------------------------------------------------------------------------------------------------------------------------------------------------------------------------------------------------------------|------------------------------------------------------------------------------------------------------------------------------------------------------|------------------------------------------------------------------------------------------------------------------------------------------------------|-------------------------------------------------------------------------------------------------------------------------------------------|-------------------------------------------------------------------------------------------------------------------------------------------|-------------------------------------------------------------------------------------------------------------------------------------------|-------------------------------------------------------------------------------------------------------------------------------------------|--|
|  | <b>Fuel<sup>21</sup></b>    | f. [During the worst season/in the last 3 months] What is the average price per litre or kg or m <sup>3</sup> that you pay for fuel to power your equipment?                                                                                                       | _____ Tk.                                                                                                                                            |                                                                                                                                                      |                                                                                                                                           |                                                                                                                                           |                                                                                                                                           |                                                                                                                                           |  |
|  | <b>RM&amp;TE or A&amp;H</b> | g. [During the worst season/in the last 3 months] How much do you spend on <b>average per month</b> for running the following application?<br><br>h. [The price excludes capital and maintenance costs]                                                            | _____ Tk.                                                                                                                                            |                                                                                                                                                      |                                                                                                                                           |                                                                                                                                           |                                                                                                                                           |                                                                                                                                           |  |
|  |                             | 36. [During the worst season/in the last 3 months], how many hours in a week on average do you spend on collecting, producing, purchasing your primary energy source for the following applications?                                                               | <div style="display: flex; flex-direction: column; align-items: center;"> <div>□□</div> <div>[hours]</div> <div>□□</div> <div>[minutes]</div> </div> | <div style="display: flex; flex-direction: column; align-items: center;"> <div>□□</div> <div>[hours]</div> <div>□□</div> <div>[minutes]</div> </div> | <div style="display: flex; flex-direction: column; align-items: center;"> <div>□□ [hours]</div> <div>□□</div> <div>[minutes]</div> </div> | <div style="display: flex; flex-direction: column; align-items: center;"> <div>□□ [hours]</div> <div>□□</div> <div>[minutes]</div> </div> | <div style="display: flex; flex-direction: column; align-items: center;"> <div>□□ [hours]</div> <div>□□</div> <div>[minutes]</div> </div> | <div style="display: flex; flex-direction: column; align-items: center;"> <div>□□ [hours]</div> <div>□□</div> <div>[minutes]</div> </div> |  |
|  |                             | 37. [During the worst season/in the last 3 months] How many hours in a week on average do you (or any of the members of your productive activity) spend on maintaining (cleaning, oiling, repairing) the primary energy source used for the following application? | <div style="display: flex; flex-direction: column; align-items: center;"> <div>□□</div> <div>[hours]</div> <div>□□</div> <div>[minutes]</div> </div> | <div style="display: flex; flex-direction: column; align-items: center;"> <div>□□</div> <div>[hours]</div> <div>□□</div> <div>[minutes]</div> </div> | <div style="display: flex; flex-direction: column; align-items: center;"> <div>□□ [hours]</div> <div>□□</div> <div>[minutes]</div> </div> | <div style="display: flex; flex-direction: column; align-items: center;"> <div>□□ [hours]</div> <div>□□</div> <div>[minutes]</div> </div> | <div style="display: flex; flex-direction: column; align-items: center;"> <div>□□ [hours]</div> <div>□□</div> <div>[minutes]</div> </div> | <div style="display: flex; flex-direction: column; align-items: center;"> <div>□□ [hours]</div> <div>□□</div> <div>[minutes]</div> </div> |  |
|  |                             | 38. [During the worst season/in the last 3 months] Does spending the time above (question 32 and 33) subtract relevant time to your productive activity and reduce business productivity?                                                                          | 1. Yes<br>2. No                                                                                                                                      | 1. Yes<br>2. No                                                                                                                                      | 1. Yes<br>2. No                                                                                                                           | 1. Yes<br>2. No                                                                                                                           | 1. Yes<br>2. No                                                                                                                           | 1. Yes<br>2. No                                                                                                                           |  |
|  |                             | 39. Which alternative energy sources that could significantly reduce the time and/or effort involved? (Select from Code B)                                                                                                                                         |                                                                                                                                                      |                                                                                                                                                      |                                                                                                                                           |                                                                                                                                           |                                                                                                                                           |                                                                                                                                           |  |

**\* Application definitions:**

**1) Lighting:** Use of energy to light working spaces to enable workers to undertake tasks, and for the comfort of customers (particularly in retail and hospitality).

*Examples: task lighting, general lighting, security lighting*

**2) ICT:** Use of energy for computing, electronics and other communication and audio-visual purposes

*Examples: computing, communications (including phone charging), photography, photocopying, printing and media (radio/TV/sound systems)*

**3) Motive power:** Mechanical uses of energy in which motion (either linear or rotational) is imparted to machinery

*Examples: ploughing, harrowing, planting, irrigation, hoeing/weeding, harvesting, logging/felling, digging, lifting, grinding, milling, hulling, sawing, planning, drilling, turning, pumping, throwing (pots), sewing, cutting, spinning, weaving, air circulation, air conditioning, refrigeration, freezing, mechanical printing*

**4) Space heating:** Use of energy to heat interior working spaces for the welfare and comfort of workers and customers

*Examples: local space heating and central heating*

**5) Product heating:** Uses of energy for heating as a direct part of the production process

*Examples: cooking, baking, firing, drying, distilling, brewing, curing, smoking, forging, smelting, annealing, welding, soldering, ironing, incubating, pasteurizing, dissolving substances, sterilizing.*

**6) Water heating:** Use of energy to heat water for hygienic and cleaning purposes<sup>22</sup>

*Examples: heating, boiling, steam production (eg for wood bending), evaporation*

<sup>21</sup> Each unit of fuel (litre, kg, m3) will be converted into the equivalent in kWh. The derived unit price per kWh equivalent will be then compared with the grid tariff. Affordability will not be assessed for fuels used for transport.

<sup>22</sup> Water heating as a means of achieving space heating is regarded as part of Space Heating

## Multi-tier Framework Questionnaire: Bangladesh

| Code A (single answer) |                                     | Code B (single answer) |                                                                                                                                                                                                      | Code C (single answer)                                                                                                                                                                                                                                                                                 |                                                     |                                |
|------------------------|-------------------------------------|------------------------|------------------------------------------------------------------------------------------------------------------------------------------------------------------------------------------------------|--------------------------------------------------------------------------------------------------------------------------------------------------------------------------------------------------------------------------------------------------------------------------------------------------------|-----------------------------------------------------|--------------------------------|
| I.                     | Energy is not available in the area | Electricity            | I. IPS<br>II. Solar lantern<br>III. Solar stand-alone system<br>IV. Rechargeable battery<br>V. Electricity generator<br>VI. Mini grid<br>VII. National grid connection from <i>[name of utility]</i> | I.                                                                                                                                                                                                                                                                                                     | Local representative/official of the energy company |                                |
| II.                    | Energy in not affordable            |                        | Fuel                                                                                                                                                                                                 | VIII. Direct use of biomass (fuel wood, charcoal,...)<br>IX. Direct use of biofuels<br>X. Direct use of biogas<br>XI. Direct use of natural gas<br>XII. Direct use of kerosene<br>XIII. Direct use of LPG<br>XIV. Direct use of diesel, gasoline, and other petroleum products (except kerosene & LPG) | II.                                                 | Pre-paid meter card seller     |
| III.                   | Appliance is not available          |                        |                                                                                                                                                                                                      |                                                                                                                                                                                                                                                                                                        | III.                                                | Community/village/municipality |
| IV.                    | Appliance in not affordable         |                        |                                                                                                                                                                                                      |                                                                                                                                                                                                                                                                                                        | IV.                                                 | Neighbour                      |
| V.                     | Load shedding                       | V.                     |                                                                                                                                                                                                      |                                                                                                                                                                                                                                                                                                        | Land lord                                           |                                |
| VI.                    | Other (specify)                     | VII.                   |                                                                                                                                                                                                      |                                                                                                                                                                                                                                                                                                        | Fuel purchase to power generator                    |                                |
|                        |                                     | RME                    | XV. Direct use of wind energy<br>XVI. Direct use of water energy                                                                                                                                     | VI.                                                                                                                                                                                                                                                                                                    |                                                     |                                |
|                        |                                     | RTE                    | XVII. Direct use of solar energy                                                                                                                                                                     | VII.                                                                                                                                                                                                                                                                                                   | PO                                                  |                                |
|                        |                                     | A&H                    | XVIII. Animal power<br>XIX. Human power                                                                                                                                                              | VIII.                                                                                                                                                                                                                                                                                                  | None                                                |                                |
|                        |                                     |                        |                                                                                                                                                                                                      | XX.                                                                                                                                                                                                                                                                                                    | No energy sources                                   | IX.                            |

| Code D (multiple answers)                                                                                                                                                                |                                                                                                                                                                                                                                                                                                                                                                |                                                                                                                                                                                                                                                                                                                                                                                                                                                                                |                                                                                                                                                                                                                                             |                                                                                                                                                                                                                                                                                                                                                                                                                                                                                                   |                                                                                                                                                                                                           |
|------------------------------------------------------------------------------------------------------------------------------------------------------------------------------------------|----------------------------------------------------------------------------------------------------------------------------------------------------------------------------------------------------------------------------------------------------------------------------------------------------------------------------------------------------------------|--------------------------------------------------------------------------------------------------------------------------------------------------------------------------------------------------------------------------------------------------------------------------------------------------------------------------------------------------------------------------------------------------------------------------------------------------------------------------------|---------------------------------------------------------------------------------------------------------------------------------------------------------------------------------------------------------------------------------------------|---------------------------------------------------------------------------------------------------------------------------------------------------------------------------------------------------------------------------------------------------------------------------------------------------------------------------------------------------------------------------------------------------------------------------------------------------------------------------------------------------|-----------------------------------------------------------------------------------------------------------------------------------------------------------------------------------------------------------|
| Lighting                                                                                                                                                                                 | ICT                                                                                                                                                                                                                                                                                                                                                            | Motive power                                                                                                                                                                                                                                                                                                                                                                                                                                                                   | Cooling                                                                                                                                                                                                                                     | Product heating                                                                                                                                                                                                                                                                                                                                                                                                                                                                                   | Water heating                                                                                                                                                                                             |
| a ___ # of fluorescent bulbs<br>b ___ # of halogen (PAR) bulbs<br>c ___ # of incandescent lamps<br>d ___ # of LED bulbs<br>e ___ # of LED streetlights<br>f ___ # of sodium streetlights | ___ Camera charger<br>___ Cell phone charger<br>___ DVD player<br>___ Fax machine<br>___ Internet router<br>___ Hand-held computing device<br>___ Personal computer<br>___ Photocopier<br>___ Portable media player<br>___ Printer (inkjet)<br>___ Printer (laser)<br>___ Projector<br>___ Radio<br>___ Recording device (industrial)<br>___ Satellite decoder | ___ Belt sander<br>___ Cold room<br>___ Drill (electric hand drill)<br>___ Drill machine <16mm<br>___ Drill machine 16-40mm<br>___ Drill machines 41-50mm<br>___ Excavator <1,200 kg<br>___ Excavator >1,200kg<br>___ Grain mill (<13kg per hour)<br>___ Grain mill (13-50kg per hour)<br>___ Grain mill (51-250kg/hour)<br>___ Grain mill (>250kg/hour)<br>___ Hand plough/hoe<br>___ Lathe (metal)<br>___ Lathe (treadle)<br>___ Lathe (wood)<br>___ Milling machine 12-25mm | a ___ Air conditioner (central)<br>b ___ Air conditioner (industrial)<br>___ Air conditioner (room)<br>___ Fan (small table fan)<br>___ Fan (standing fan or ceiling fan)<br>___ Refrigerator/freezer (500 liters)<br>-----Bought iceblocks | ___ Brewing kettle (2,000 liters)<br>___ Brewing kettle (200 liters)<br>___ Cooker, rice (domestic)<br>___ Cooker, rice (commercial)<br>___ Cooker (pressure cooker)<br>___ Cooker (commercial range cooker)<br>___ Cooker (slow cooker, 3.5 liters)<br>___ Distillation apparatus (1.5liter/hour)<br>___ Distillation apparatus (5liter/hour)<br>___ Electric burner (single)<br>___ Electric burners (2)<br>___ Electric burners (4)<br>___ Fan for grain drying shed<br>___ Forge (industrial) | ___ Domestic electric shower<br>___ Steam cleaner (3kg/hour at 4 bar)<br>___ Steam generator (portable) (2kg/hour)<br>___ Steam generator (23kg/hour) with 6000 cylinder<br>___ Water heater (7-30liters) |

## Multi-tier Framework Questionnaire: Bangladesh

|  |                                                                                                                                                                                                                                                                                                                                                                                                                         |                                                                                                                                                                                                                                                                                                                                                                                                                                                                                                                                                                                                                                                                                                                                       |  |                                                                                                                                                                                                                                                                                                                                                                                                                                                                                                                                                                                                                                                                                                                                                                                                                                                                                                                                                                               |  |
|--|-------------------------------------------------------------------------------------------------------------------------------------------------------------------------------------------------------------------------------------------------------------------------------------------------------------------------------------------------------------------------------------------------------------------------|---------------------------------------------------------------------------------------------------------------------------------------------------------------------------------------------------------------------------------------------------------------------------------------------------------------------------------------------------------------------------------------------------------------------------------------------------------------------------------------------------------------------------------------------------------------------------------------------------------------------------------------------------------------------------------------------------------------------------------------|--|-------------------------------------------------------------------------------------------------------------------------------------------------------------------------------------------------------------------------------------------------------------------------------------------------------------------------------------------------------------------------------------------------------------------------------------------------------------------------------------------------------------------------------------------------------------------------------------------------------------------------------------------------------------------------------------------------------------------------------------------------------------------------------------------------------------------------------------------------------------------------------------------------------------------------------------------------------------------------------|--|
|  | <input type="checkbox"/> Satellite dish<br><input type="checkbox"/> Scanner<br><input type="checkbox"/> Server (quad core)<br><input type="checkbox"/> Server (system)<br><input type="checkbox"/> Server room power distribution unit<br><input type="checkbox"/> Television (black & white)<br><input type="checkbox"/> Television (color)<br><input type="checkbox"/> VHS<br><input type="checkbox"/> Voice recorder | <input type="checkbox"/> Potter's wheel <25kg clay<br><input type="checkbox"/> Potter's wheel 30-50kg clay<br><input type="checkbox"/> Power loom<br><input type="checkbox"/> Saw (chain)<br><input type="checkbox"/> Saw (circular)<br><input type="checkbox"/> Saw (rip saw)<br><input type="checkbox"/> Sewing machine<br><input type="checkbox"/> Spinning wheels/machines, looms<br><input type="checkbox"/> Vacuum cleaner<br><input type="checkbox"/> Washing machine (domestic)<br><input type="checkbox"/> Water pump <3m <sup>3</sup> /hour over <30m head<br><input type="checkbox"/> Water pump 3-4m <sup>3</sup> /hour over 30-70m head<br><input type="checkbox"/> Water pump 5-80m <sup>3</sup> /hour over 30-70m head |  | <input type="checkbox"/> Grain dryer >10Te/hour<br><input type="checkbox"/> Grill<br><input type="checkbox"/> Hair dryer<br><input type="checkbox"/> Incubator (25-400 eggs)<br><input type="checkbox"/> Iron (cloth iron)<br><input type="checkbox"/> Kettle (domestic, 1,7 liters)<br><input type="checkbox"/> Metal arc welding (500A)<br><input type="checkbox"/> Microwave (commercial)<br><input type="checkbox"/> Microwave (domestic)<br><input type="checkbox"/> Oven (commercial)<br><input type="checkbox"/> Oven (domestic)<br><input type="checkbox"/> Pasteurizer (5,000 liters/hour)<br><input type="checkbox"/> Pottery kiln 1,300°C (>140 liters)<br><input type="checkbox"/> Pottery kiln 1,300°C (25-140 liters)<br><input type="checkbox"/> Soldering iron<br><input type="checkbox"/> Tea dryer<br><input type="checkbox"/> Toaster<br><input type="checkbox"/> Tobacco curing kiln fan<br><input type="checkbox"/> Wood-drying kiln (46m <sup>3</sup> ) |  |
|--|-------------------------------------------------------------------------------------------------------------------------------------------------------------------------------------------------------------------------------------------------------------------------------------------------------------------------------------------------------------------------------------------------------------------------|---------------------------------------------------------------------------------------------------------------------------------------------------------------------------------------------------------------------------------------------------------------------------------------------------------------------------------------------------------------------------------------------------------------------------------------------------------------------------------------------------------------------------------------------------------------------------------------------------------------------------------------------------------------------------------------------------------------------------------------|--|-------------------------------------------------------------------------------------------------------------------------------------------------------------------------------------------------------------------------------------------------------------------------------------------------------------------------------------------------------------------------------------------------------------------------------------------------------------------------------------------------------------------------------------------------------------------------------------------------------------------------------------------------------------------------------------------------------------------------------------------------------------------------------------------------------------------------------------------------------------------------------------------------------------------------------------------------------------------------------|--|
